1 Genome-scale Model Constrained by  
2 Proteomics Reveals Metabolic Changes in  
3 *Streptomyces coelicolor* M1152  
4 Compared to M145  
5

6 Snorre Sulheim<sup>1,2</sup>, Tjaša Kumelj<sup>2</sup>, Dino van Dissel<sup>1</sup>, Ali Salehzadeh-Yazdi<sup>3</sup>, Chao Du<sup>4</sup>, Gilles P.  
7 van Wezel<sup>4</sup>, Kay Nieselt<sup>5</sup>, Eivind Almaas<sup>2,6</sup>, Alexander Wentzel<sup>1</sup>, Eduard J Kerkhoven<sup>7,8,\*</sup>

- 8 1. Department of Biotechnology and Nanomedicine, SINTEF Industry, Trondheim,  
9 Norway
- 10 2. Network Systems Biology Group, Department of Biotechnology and Food Science,  
11 NTNU - Norwegian University of Science and Technology, Trondheim, Norway
- 12 3. Department of Systems Biology and Bioinformatics, Faculty of Computer Science and  
13 Electrical Engineering, University of Rostock, Rostock, Germany
- 14 4. Microbial Biotechnology, Institute of Biology, Leiden University, Leiden, The  
15 Netherlands
- 16 5. Integrative transcriptomics, Center for Bioinformatics, University of Tübingen,  
17 Tübingen, Germany
- 18 6. K.G. Jebsen Center for Genetic Epidemiology, Department of Public Health and  
19 General Practice, NTNU - Norwegian University of Science and Technology,  
20 Trondheim, Norway
- 21 7. Systems and Synthetic Biology, Department of Biology and Biological Engineering,  
22 Chalmers University of Technology, Gothenburg, Sweden
- 23 8. Novo Nordisk Foundation Center for Biosustainability, Chalmers University of  
24 Technology, Gothenburg, Sweden
- 25 \* Corresponding author. Email: [eduardk@chalmers.se](mailto:eduardk@chalmers.se)

## 26 Abstract

27 Many biosynthetic gene clusters (BGCs) in the genomes of environmental microorganisms  
28 require heterologous expression in order to realize their genetic potential, including cryptic  
29 and metagenomic BGCs. *Streptomyces coelicolor* M1152 is a widely used host strain for the  
30 heterologous expression of BGCs, as it has been genetically engineered for this purpose via  
31 the deletion of four of its native biosynthetic gene clusters (BGCs) and the introduction of a  
32 point mutation in the *rpoB* gene that encodes the beta subunit of RNA polymerase. This  
33 latter mutation was shown to have a strong positive impact on antibiotic biosynthesis via  
34 processes that remain poorly understood. Therefore, a systemic understanding of the  
35 consequences on cellular metabolism of the genomic changes of M1152 could greatly  
36 contribute to this understanding. Here we carried out a comparative analysis of M1152 and  
37 its ancestor strain M145, connecting observed phenotypic differences to changes in  
38 transcript and protein abundance. Measured protein abundance was used to constrain an  
39 amended genome-scale model (GEM) and to predict metabolic fluxes. This approach  
40 connects observed differences in growth rate and glucose consumption to changes in central  
41 carbon metabolism, accompanied by differential expression of important regulons. Our  
42 results suggest that precursor availability is not limiting the biosynthesis of secondary  
43 metabolites. This implies that alternative strategies could be beneficial for further  
44 development of *S. coelicolor* for heterologous production of novel compounds.

## 45 Importance

46 This study provides the first systems description of *S. coelicolor* M1152, an engineered host  
47 widely used for the heterologous expression of BGCs directing the synthesis of natural  
48 products. By combining time-series proteomics and transcriptomics, batch fermentation

49 data and genome-scale modelling, we can connect observed phenotypes to known genetic  
50 modifications and find extensive metabolic rewiring in the M1152 strain compared to the  
51 wild-type strain M145. Our study indicates that the deletion of secondary metabolite  
52 biosynthetic pathways thought to enhance precursor availability, only has a minor impact on  
53 the ability of the modified strain to produce heterologous molecules. In contrast, the *rpoB*  
54 mutation is likely responsible for the most dramatic changes in regulatory features and  
55 precursor availability. The amended genome-scale model, reconstructed in an open-science  
56 framework, allowed us to contextualize the transcriptional changes. This framework  
57 facilitates further development by the research community in an organized manner,  
58 including version control, continuous integration and quality control and tracking of  
59 individual contributions.

## 60 Introduction

61 The bacterium *Streptomyces coelicolor* has been the *de facto* model actinomycete for the  
62 production and regulation of antibiotics (1). Being known for over 100 years, the interest in  
63 this organism predates the golden age of antibiotic research. With its complex life cycle,  
64 featuring mycelial growth and differentiation, spore formation, programmed cell death and  
65 the ability to produce multiple secondary metabolites, including calcium-dependent  
66 antibiotic (CDA) and the conveniently coloured actinorhodin (Act, blue) and  
67 undecylprodigiosin (Red, red), it has assisted greatly in our understanding how  
68 streptomycetes sense their surroundings (2–6), activate their developmental cycle (7) and  
69 regulate the production of antibiotics (8, 9). Further aided by the publication of its genome  
70 sequence (10), the antibiotic coelimycin P1 (yellow), produced from the formerly cryptic  
71 polyketide gene cluster known as *cpk*, was added to this list (11). Today, the widespread use

72 of *S. coelicolor* continues as a host for heterologous production of biosynthetic gene clusters  
73 (BGCs) (12–17). Heterologous expression is a powerful strategy for novel compound  
74 discovery from BGCs that are either natively silent or originate from an unculturable source  
75 (18). Both are large untapped resources of microbial biodiversity, nowadays made evident  
76 and accessible due to recent advances within the fields of metagenomics, molecular biology  
77 and bioinformatics (19).

78 The efficiency of *S. coelicolor* as a heterologous production host relies on a metabolism that  
79 has evolved to provide the necessary precursors to produce a broad range of complex  
80 molecules. Many of these molecules are produced when the strain is experiencing nutrient-  
81 limiting conditions that lead to growth cessation and complex re-modelling of its metabolism  
82 (20). Metabolic switching in *S. coelicolor* M145 in response to phosphate and glutamate  
83 depletion has previously been studied in detail at a wide variety of metabolic levels (1–3),  
84 unravelling a complex sequence of switching events that ultimately lead to the biosynthesis  
85 of the antibiotics CDA, Red and Act. The biosynthesis of coelimycin P1 occurs earlier than the  
86 three other compounds in the growth cycle and appears to be independent of the major  
87 metabolic switch (8).

88 To improve *S. coelicolor* M145 as a host for heterologous BGCs expression, strain M1146 was  
89 created by the sequential deletion of its four major BGCs (*act*, *red*, *cda* and *cpk*) (13). This  
90 should increase precursor availability for the production of a whole range of heterologous  
91 products and provides a cleaner chromatographic background to easier identify novel  
92 compounds. *S. coelicolor* M1152 is a derivative of M1146, that besides the deletion of the  
93 four main BGCs bears the C1298T point mutation in the *rpoB* gene that encodes the beta  
94 subunit of RNA polymerase. This mutation was shown to have strong positive effects on the

95 production of various antibiotics (13, 22). Up to now, M1152 is a preferred general  
96 'superhost' for heterologous BGC expression (12, 16, 23–25) and is the starting point for  
97 further strain development.

98 A hurdle in further development of *S. coelicolor* as a 'superhost' is the limited knowledge of  
99 M1152 metabolism and its regulatory systems, even if some insight can be gained from  
100 analysing snapshots of gene expression levels during regular time intervals of a batch  
101 fermentation (26–30). Since enzymes are catalysing most metabolic transformations,  
102 assessing protein abundance or gene expression contributes to the elucidation of metabolic  
103 behaviour. Here, we therefore apply proteomics data as constraints (31) on a genome-scale  
104 metabolic model (GEM) of *S. coelicolor* to reveal how proteome changes affect the  
105 metabolic fluxes during the different stages of growth and development, and how the  
106 metabolism of *S. coelicolor* M1152 differs from its parent strain, M145.

107 GEMs are both valuable resources of strain-specific knowledge, mathematical models able to  
108 predict steady-state flux distributions, and frameworks for interpretation and integration of  
109 different 'omics' data, e.g. transcriptomics and proteomics (32). The increased interest in  
110 using genome-scale models of *S. coelicolor* is conspicuous. Since the first reconstruction in  
111 2005 (33), five GEMs have been published (15, 34–37), including three in 2018: iKS1317 (15),  
112 Sco4 (37) and iAA1259 (35). Additionally, as a model organism for the *Actinomycetes*, the  
113 GEMs of *S. coelicolor* are frequently used as template for model development of closely  
114 related strains (38), such as *S. clavuligerus* (39), *Saccharopolyspora erythraea* (40) and *S.*  
115 *lividans* (41). The recent updates of the *S. coelicolor* GEM were developed in parallel by  
116 different research groups: while all groups share the common interest of utilizing a high-  
117 quality model for predictions and data analysis, the prevailing approach of independent

118 parallel development is inefficient. Additional to duplicating a considerable amount of work,  
119 lack of common standards for documentation of progress and issues, evaluation of model  
120 performance, as well as the use of different annotations makes it cumbersome to compare  
121 and merge models.

122 To increase the rate and quality of model reconstruction, in this study two research groups  
123 of the Sco-GEM community, responsible for two of the latest model updates (15, 37), have  
124 joined forces to merge existing GEMs of *S. coelicolor* into one consensus-model that is  
125 publicly hosted on GitHub and can be continuously updated and improved by all members of  
126 the community. Hosting the model on GitHub has many advantages: (i) open access and  
127 contribution; (ii) version control; (iii) continuous development and integrated quality control  
128 with memote (42); (iv) new improvements released instantly (no publication lag time); and  
129 (v) complete documentation of model reconstruction. Such an approach has historic  
130 precedents: model reconstruction as a community effort has been a success for the human  
131 GEM (43), baker's yeast (44–49) and Chinese Hamster Ovary cells (50). The recent  
132 developments in *S. coelicolor* model and strain improvements in different research groups  
133 prove that it is an opportune time now to join forces in the *Streptomyces* modelling efforts  
134 as well.

## 135 Results

### 136 Improvement of Sco-GEM

137 We conducted a stepwise reconstruction of Sco-GEM, the consensus genome-scale  
138 metabolic model of *S. coelicolor*, while tracking development using Git for version control  
139 (**Figure 1A; Data Set S1, Tab 1**). Sco-GEM is the most comprehensive and highest quality  
140 GEM of this organism (**Figure 1B**), comprising 1777 genes, 2612 reactions, 2073 metabolites

141 and a memote score of 77%, which is indicative of the overall model quality (42). Sco-GEM  
142 features accuracy of 96.5% and 74.5% (**Figure 1C**) in predicting correct phenotypes for  
143 growth environments and knockout mutants, respectively.

144 Sco-GEM has been reconstructed by curating the recently published iKS1317 model (15) to  
145 include genes, reactions and metabolites from the equally recently published models  
146 iAA1259 (35) and Sco4 (37). While the curations from iAA1259 were primarily related to  
147 coelimycin P1, butyrolactone, xylan and cellulose pathways, the 377 reactions added to Sco-  
148 GEM from Sco4 were scattered across a large range of different subsystems, covering both  
149 primary and secondary metabolism (**Figure S1**).

150 Subsequent to merging the existing *S. coelicolor* GEMs, we performed a number of further  
151 curations of the model: including improvement of annotations, both in terms of coverage  
152 and number of different databases, e.g. KEGG (51, 52), BioCyC (53), ChEBI (54) and  
153 MetaNetX (55). All reactions and metabolites have been given identifiers according to the  
154 BiGG namespace (56), and all reactions are categorized into 15 different subsystems,  
155 covering 128 different pathways.

156 The biomass composition was curated to reflect estimated levels of prosthetic groups that  
157 are associated to cellular proteins. Proteomics data, as discussed below, were used to  
158 estimate protein levels, while UniProt (57) provided annotations of proteins with prosthetic  
159 groups, which was used to estimate overall prosthetic group levels (**Data Set S1, Tab 2**).

160 Reaction reversibility updated for almost a third of queried reactions

161 The determination of reaction directionality and reversibility is an important step in a GEM  
162 reconstruction (58). However, the thermodynamic consistency of reactions was not  
163 considered in previous *S. coelicolor* models. We calculated Gibbs free energy changes for 770

164 of the 2612 model reactions (**Data Set S1, Tab 3**) using eQuilibrator (59), and inconsistencies  
165 in assigned reaction bounds transpired from a significant overlap of the range of Gibbs free  
166 energies between reversible and irreversible reactions (**Figure 1D**). A relatively lenient  
167 threshold of  $-30$  kJ/mol was defined to classify a reaction as irreversible; with the intent not  
168 to over-constrain the model (**Figure 1E**). The proposed changes in reversibility were  
169 evaluated against growth and knockout data (15), discarding 59 of 770 of the proposed  
170 reactions. Consequentially, the flux bounds of 273 reactions were modified, while all ATP-  
171 driven reactions were manually curated and generally assumed irreversible, unless they had  
172 an estimated positive change in Gibbs free energy or were known to be reversible. Examples  
173 of this include nucleoside diphosphate kinase (60) and ATP synthase (61).

#### 174 Curation of transport reactions

175 As transport reactions have previously not been extensively curated in *S. coelicolor* models,  
176 we performed a thorough curation of transporters by querying various databases and BLAST  
177 analysis as detailed in Materials and Methods. This culminated in adding 43 new transport  
178 reactions and updating 39 of the 262 existing reactions in Sco-GEM (**Figure 1F; Data Set S1,**  
179 **Tab 4**). The majority of the transporters comprises primary active transport proteins and  
180 secondary carriers (46%), in accordance with previous work (62). Most primary active  
181 transporters are ATP-binding cassette (ABC) transporters (30%), while proton symports  
182 (30%) dominate the secondary carriers.

#### 183 Development of the enzyme-constrained model EcSco-GEM

184 To include explicit constraints regarding enzymes catalysing metabolic reactions, the GECKO  
185 formalism (31) was applied to introduce enzyme turnover rates ( $k_{\text{cat}}$ ) and prepare the model  
186 for integration of proteome data. The flux variability of the resulting enzyme-constrained



187 model (EcSco-GEM) is strongly reduced compared to the classic genome-scale model (**Figure**  
188 **1G**), as infeasible solutions due to limitation in protein allocation are discarded, significantly  
189 improving model predictions. From this, 17 time- and strain-specific EcSco-GEM models  
190 were generated by incorporation of estimated growth-, secretion- and uptake rates, as well  
191 as proteome data from cultivations that are detailed and analysed below.

192 [Framework for further development of Sco-GEM by the community](#)

193 The Sco-GEM model is hosted as an open repository as suggested by memote, a recently  
194 developed tool for transparent and collaborative model development (42). The memote tool  
195 is incorporated in the repository through Travis CI and tracks the model development on  
196 every change of the model. Sco-GEM v1.2.0 achieved a memote-score of 77%, which is  
197 superior to any previous model of *S. coelicolor* (**Figure 1B; Supplemental Information**).

198 Hosting Sco-GEM on GitHub with memote integration ensures continuous quality control  
199 and enables public insight into all aspects of model reconstruction and curation: any user  
200 can report errors or suggest changes through issues and pull requests. As contributions to  
201 the model development are fully trackable and can therefore be credited fairly, Sco-GEM is  
202 positioned as a community model that we envision to be continuously updated and widely  
203 used by the *S. coelicolor* research community.

204 In the remaining parts of the Results section, we have applied Sco-GEM along with  
205 transcriptome and proteome data, to study and compare the responses of *S. coelicolor*  
206 M145 and M1152 to phosphate depletion on a systems level and for the first time provide  
207 detailed insight into the distinct physiological features of engineered 'superhost' strain  
208 M1152, which will be of value for its further development.

209

210 The enzyme-constrained model connects regulatory changes in *S. coelicolor* M145 in  
211 response to phosphate depletion with the production of the major secondary  
212 metabolites.

213 To evaluate whether the (Ec)Sco-GEM models can simulate behaviours of *S. coelicolor*  
214 metabolism, we performed and analysed time-course sampled cultivations of secondary  
215 metabolite producing strain M145 in the context of the generated models. For that purpose,  
216 *S. coelicolor* M145 was cultivated in batch fermentations using standardized protocols  
217 reported earlier (20). Cultures were sampled for 'omics data, as well as substrate utilization  
218 and secondary metabolite measurements to identify regulatory, proteomic and metabolic  
219 changes during the metabolic switch. The online and offline measurements showed that  
220 phosphate depletion in the cultivation medium was reached approximately 35 hours after  
221 inoculation. Shortly after, the culture growth ceased, and first Red and subsequently Act  
222 were detected in the culture medium (**Figure 2A and 2B**). Both D-glucose and L-glutamate  
223 were consumed concomitantly, and their consumption continued after phosphate depletion,  
224 while both remained in excess until the end of cultivation. Note that *Streptomyces* can utilize  
225 intracellular phosphate storages after the medium is phosphate depleted (63). The RNA-seq  
226 and untargeted proteomic data were analysed in the light of previous studies (8, 9) and were  
227 in good agreement with data previously obtained from microarrays or targeted proteomics  
228 (8, 34) (**Figure 2C and S2**). This confirmed the high reproducibility of the experiments across  
229 independent cultivations and high reliability of the chosen cultivation and analytic  
230 procedures (**Figure 2**).

231 The proteome data were incorporated into EcSco-GEM to yield time-specific metabolic  
232 models of M145, giving insight on the changes occurring in the metabolic activity of different

233 pathways during batch cultivation. Metabolic fluxes were estimated using an unbiased  
234 approach of random sampling, as alternative to optimization of a well-defined cellular  
235 objective used in flux balance analysis (64). It is possible that *S. coelicolor* is wired to  
236 maximize its growth rate prior to phosphate depletion, but after the metabolic switch, it is  
237 difficult to define a clear cellular objective. We applied an approach that samples the  
238 vertices of the solution space (65), and used their mean values to compare the metabolic  
239 fluxes between the two strains and between different time points. The general overview  
240 from **Figure 2D** is an initial validation of the model. It shows that the metabolic switch  
241 induces a large shift in global gene expression (8) and predicts that the most drastic changes  
242 in fluxes occur in response to phosphate depletion.

243 The response to phosphate depletion from the medium is achieved by a set of genes,  
244 positively regulated by PhoP, that are involved in phosphate scavenging, uptake and saving  
245 (66–68). The metabolic switch can be readily identified by the rapid upregulation of this  
246 regulon after 35 hours of cultivation in M145 and 47 hours in M1152 (**Figure 2C**). PhoP also  
247 negatively regulates nitrogen assimilation (69), which can partly explain the change in amino  
248 acids metabolism after phosphate depletion. Indeed, from the RNA-seq data we find that  
249 glutamate import, the glutamate sensing system *gluR-gluK* (70), *glnR* (71) and *glnA* are  
250 downregulated immediately subsequent to phosphate depletion (**Figure S3**). Since PhoP is  
251 also known to regulate negatively the biosynthesis of secondary metabolites, the switching  
252 of its expression likely delays these pathways (69, 72). However, after 37 hours of cultivation  
253 the upregulation of the *cda* and *red* genes was observed, whereas that of the *act* genes was  
254 initiated at 41 hours (**Figure 2F**). Production of Red and Act was measurable in the culture  
255 medium after 41 and 49 hours of cultivation, respectively (**Figure 2B**). The enzyme-  
256 constrained models predict an immediate increase in fluxes through the biosynthetic

257 pathways for the four main compounds Act, Red, CDA and coelimycin P1 after the metabolic  
258 switch (**Figure 2D**).

259 The onset of secondary metabolism is strongly correlated with an increase in oxidative  
260 phosphorylation and a decrease in fatty acid biosynthesis in M145.

261 The metabolic switch was shown to be correlated with an enhanced degradation of  
262 branched-chain amino acids (valine, leucine and isoleucine), an increase in oxidative  
263 phosphorylation and a decrease in fatty acid biosynthesis (**Figure 2D and S4**). An active  
264 oxidative phosphorylation relies on an active TCA cycle that generates reduced co-factors  
265 whose re-oxidation by the respiratory chain generates a proton gradient that drives ATP  
266 synthesis by the ATP synthase. The feeding of the TCA cycle requires acetyl-CoA, as well as  
267 nitrogen. Nitrogen likely originates from degradation of glutamate and branched-chain  
268 amino acids, whereas acetyl-CoA likely originates from glycolysis, as well as from the  
269 degradation of these amino acids as previously demonstrated (73). Indeed, the model  
270 predicts an increased flux through citrate synthase feeding acetyl-CoA into the TCA cycle  
271 (**Figure S5A**). The predicted increase in oxidative phosphorylation is supported by the RNA-  
272 seq data showing upregulation of enzymes belonging to the respiratory chain (**Figure S5B**).  
273 This is consistent with the clear correlation previously reported between high ATP/ADP ratio,  
274 resulting from an active oxidative phosphorylation, and actinorhodin production (74).  
275 Furthermore, the consumption of acetyl-CoA by the TCA cycle to support the oxidative  
276 metabolism logically impairs fatty acids biosynthesis (74).

277

278 The pentose phosphate pathway provides the main redox cofactor NADPH for polyketide  
279 biosynthesis, as well as to combat oxidative stress, and its model-predicted flux increase

280 upon initiation of polyketide synthesis is in agreement with previous studies (75, 76). A clear  
281 positive correlation was also noticed between the biosynthesis of alanine, aspartate and  
282 glutamate, which are precursors for CDA and/or coelimycin P1 (**Figure 2D**) and the  
283 biosynthesis of these antibiotics. Similar observations were made in the antibiotic-producing  
284 *Amycolatopsis sp.* (77). Our EcSco-GEM model proved to be in good agreement with  
285 previously reported findings, indicating that it is able to capture *S. coelicolor* metabolic  
286 behaviour.

287 [Model-assisted characterization of engineered \*S. coelicolor\* M1152 and its responses](#)  
288 [to phosphate depletion](#).

289 As detailed above, EcSco-GEM shed a new light on the metabolic switch in secondary  
290 metabolite producing strain M145. *S. coelicolor* M1152 (13) is a M145 derivative devoid of  
291 the four major BGCs and bearing a point mutation in the *rpoB* gene. A better systemic  
292 understanding of M1152 metabolism would benefit to its further development as a  
293 performing host. To do so, a comparative analysis of gene expression levels and metabolic  
294 fluxes was carried out in the strains M145 and M1152.

295 Batch cultivations of M1152 were performed using identical conditions and comparable  
296 sampling regimes as for M145 reported above. This enabled a direct comparison of the two  
297 strains at a systems level, revealing both expected and unexpected effects of the strains'  
298 genetic differences (**Figure 3**). As anticipated, the products of the Cpk, CDA, Red, and Act  
299 biosynthetic pathways were undetectable in M1152 (**Figure 3A**). As previously observed  
300 (13), the growth rate of M1152 is reduced compared to M145 ( $0.15 \text{ h}^{-1}$  vs  $0.21 \text{ h}^{-1}$  in the  
301 initial exponential growth phase), delaying phosphate depletion by M1152 to 47 hours after  
302 inoculation (**Figure 3A**).

303 The sampling time points for proteome and transcriptome were adjusted accordingly (**Figure**  
304 **3B**), enabling pairwise comparison of measurements between the two strains. Genes  
305 responsive to phosphate depletion, members of the PhoP regulon (8), were used to align the  
306 different sample datasets for M145 or M1152 (**Figure 3C**). Interestingly, most of the  
307 responses of M145 to phosphate depletion were retained in M1152 (**Figure 3D**). Principle  
308 component analysis of the proteome data confirms high consistency between corresponding  
309 biological replicates and incremental changes between sample points for both M145 and  
310 M1152 (mainly explained by PC1: 18.6% variance, **Figure 3E**). A clear strain dependent  
311 clustering of the data (PC2: 15.5% variance) indicates global significant differences at the  
312 protein level. EcSco-GEM was subsequently used to predict metabolic changes in M1152  
313 (**Figure 3E**).

314 The different glutamate and glucose consumption rates of M145 and M1152 (**Figure 4A and**  
315 **4B**) resulted in substantial metabolic differences between the two strains prior to phosphate  
316 depletion. During cultivation on SSBM-P medium, where glutamate is the sole nitrogen  
317 source, glucose and glutamate are co-consumed. M1152, as M1146 (74), has a reduced  
318 specific glucose uptake rate compared to M145. It thus obtains a larger share of its carbon  
319 from glutamate (**Figure 4A and 4B**) and has consequently also a higher nitrogen availability  
320 than M145. A reduced flux through glycolysis has also been reported previously for strain  
321 M1146 (78). This might be an effect of the predicted increased concentration of ATP in  
322 M1146 compared to M145, which inhibits glucose uptake and phosphofructokinase (74, 78).  
323 Since Act was proposed to act as an electron acceptor reducing the efficiency of the  
324 oxidative phosphorylation, it is suggested that the lack of Act in M1146 causes the elevated  
325 ATP levels (74). However, we find the largest difference in glycolytic flux at early time points,

326 prior to phosphate depletion and Act production in M145, proving that Act itself cannot  
327 explain this observation.

328 The EcSco-GEM predicts the consequences of the reduced glucose uptake of M1152 on its  
329 central carbon metabolism (**Figure 4C**). A less active glycolysis in M1152 than in M145 leads  
330 to a lower carbon flow towards acetyl-CoA and thus lower excretion of acetate compared to  
331 M145 (**Figure 4B**). Furthermore, EcSco-GEM reveals an increased flux from glutamate to  
332 alpha-ketoglutarate. Indeed, a fraction of the pool of oxaloacetate might be converted into  
333 alpha-ketoglutarate by aspartate transaminase to feed the TCA cycle. The rest might be  
334 converted into phosphoenolpyruvate (PEP) by PEP carboxykinase for gluconeogenesis, since  
335 PEP carboxykinase was shown to carry higher fluxes in M1152 than in M145 (**Figure 4C**).

336 Since recent studies have demonstrated a reverse correlation between antibiotic and  
337 triacylglycerol biosynthesis in *S. lividans* and *S. coelicolor* (74, 79), one can speculate that the  
338 acetyl-CoA/malonyl-CoA units yielded by glycolysis for the biosynthesis of antibiotics in  
339 M145 are being used for enhanced growth and/or fatty acids and TAG biosynthesis in  
340 M1152. However, this is likely not the case, as M1152 has rather a reduced growth rate  
341 compared to M145, and fatty acid biosynthesis remains downregulated after the switch  
342 (**Figure 5**). It is noteworthy that the flux toward this acetyl-CoA/malonyl-CoA sink is still 3- to  
343 6-fold larger than the total flux going into secondary metabolite biosynthesis. We thus  
344 propose that together with enhanced nitrogen availability, acetyl-CoA made available from  
345 the deletion of these BGCs is used to feed the TCA cycle to support the oxidative metabolism  
346 in M1152. This would generate oxidative stress whose toxic effects might be responsible for  
347 the growth delay of this strain.

348 Transcriptome analysis reveal differential expression of global regulators

349 While the proteome data are an integral part of the EcSco-GEM models, RNA-seq data were  
350 used to both verify the trends and to gain further insights in the regulatory changes that are  
351 not captured by the metabolic models. As the proteomic data, the RNA-seq data showed  
352 large global differences between M1152 and M145, revealing 499 differentially expressed  
353 genes with a significance threshold of  $p < 0.01$ .

354 Unsupervised clustering of the significantly changed genes reveal differences in regulatory  
355 systems related to redox regulation, signalling and secondary metabolism. The significantly  
356 changed genes were clustered into 7 groups with K-means clustering, with clusters 1-3  
357 containing genes that are upregulated in M1152 compared to M145 and clusters 4-7 vice  
358 versa (**Figure S6A and Data Set S1, Tab 5**). A Gene Ontology (80, 81) enrichment analysis of  
359 the seven clusters was conducted to identify upregulated processes in each of the two  
360 strains (**Figure S7, cf. Figure S6A**).

361 The enriched processes upregulated in M1152 point to increased oxidative stress (**Figure S7**):  
362 antioxidant and peroxidase activity (SCO2633 [sodF]; SCO4834-35) in addition to  
363 biosynthesis of carotenoid (SCO0185–SCO0188), a known antioxidant (82, 83). The putative  
364 proteins within the cytochrome-P450 family (SCO7416–SCO7422) found in cluster 1 might  
365 also be linked to increased oxidative stress (84), but also to oxidation of precursors used for  
366 the synthesis of macrolides (85). Indeed, by comparing the time series expression levels for  
367 genes related to oxidative stress we observe that the majority of genes related to oxidative  
368 stress are upregulated in M1152 (**Figure 6**). These changes correlate to a more active  
369 oxidative metabolism and TCA cycle as predicted by Ec-ScoGEM (**Figure 4**).



370 In cluster 2 we find *scbA* (SCO6266) and its downstream gene *scbC* (SCO6267), which stands  
371 out by being almost 6-fold upregulated in M1152. This high expression level is likely due to  
372 the deletion of *scbR2* (SCO6286), the last gene selected to be part of the *cpk* BGC (86).  
373 Besides regulation of the *cpk* cluster, ScbR2 binds upstream of several global regulators of  
374 development and secondary metabolism, including AfsK, SigR, NagE2, AtrA, AdpA and ArgR  
375 (87). It also acts together with ScbR to regulate ScbA, which produces the  $\gamma$ -butyrolactone  
376 SCB1. However, when looking at the genes regulated by ScbR (87), we only observe a clear  
377 difference in expression for genes regulated by AfsR (phosphorylated by AfsK) (88, 89), while  
378 this is not the case for genes regulated by ArgR, AdpA or ScbR itself (**Figure S5C-F**).

379 Amongst the genes upregulated in M145, in cluster 4 we find genes related to the redox  
380 regulated transcription factor SoxR (90), and a similar pattern is observed for the entire SoxR  
381 regulon (**Figure S6B**). SoxR is known to react directly to the presence of actinorhodin (91,  
382 92), and indeed, in M145 this group of genes follows the production profile of actinorhodin,  
383 while their expression remains low in M1152 since Act is not produced. The benzoquinone  
384 Act, as electron acceptor, is thought to reduce respiration efficiency and thus energy charge  
385 as well as to combat oxidative stress (74). Consistently, the RNA-seq data revealed that the  
386 ATP-synthase gene cluster (SCO5366–SCO5374) was upregulated almost 2-fold in M1152  
387 compared to M145, most prominently in the stationary phase during Act production (**Figure**  
388 **S6C**). This agrees with observations in the M1146 strain (78). Cluster 4 also contains the  
389 genes directly up- and downstream of the deleted actinorhodin BGC in M1152 (SCO5071–  
390 SCO5072, encoding 3-hydroxyacyl-CoA dehydrogenase, and SCO5091–SCO5092, encoding a  
391 two-component flavin-dependent monooxygenase system) (93). In clusters 5, 6 and 7 we  
392 find genes with reduced expression in M1152, and the enriched processes are related to

393 cellular and iron ion homeostasis, development, signalling and morphology. This

394 corresponds to the delayed sporulation observed for M1152 (13).

### 395 Elevated expression of ribosomal proteins in M1152 after phosphate depletion

396 An increased transcription of genes encoding ribosomal proteins could be observed in

397 M1152 after phosphate depletion (**Figure S6D**). The *rpoB* mutation of the RNA polymerase

398 present in M1152 is thought to induce a conformational change mimicking the binding of

399 guanosine tetraphosphate (ppGpp) to this enzyme (22). ppGpp is synthesized in response to

400 nutritional stress and reduces the transcription of genes related to active growth, such as

401 genes encoding ribosomal RNAs and ribosomal proteins (94), whereas it up-regulates those

402 involved in development/differentiation and antibiotic production (95, 96). In consequence

403 the up-regulation of ribosomal proteins was unexpected in M1152, especially since the

404 expression of the ppGpp regulon was not found to be significantly changed in M1152 (**Figure**

405 **S5G and S5H**). However, since high nucleoside triphosphate levels are known to have a

406 positive impact on ribosome synthesis (97), we hypothesize that the higher ATP content of

407 M1152 compared to M145, after phosphate depletion, may be responsible for the

408 differences in expression of ribosomal proteins. Such difference in ribosomal protein

409 expression is mainly seen in the antibiotic production phase and correlated with production

410 of Act in M145, which has a negative impact on the energetic state of the cell (74).

### 411 Reduced production of the polyketide germicidin in M1152

412 It is usually thought that removal of sinks consuming valuable precursors improves the

413 ability of a strain to produce heterologous metabolites requiring these precursors for their

414 biosynthesis. It was therefore unexpected that the production rate (in  $\text{ng ml}^{-1} \text{ hour}^{-1}$ ) of the

415 polyketides germicidin A and B (98), autologous to both M145 and M1152, was reduced by

416 92% and 82% for germicidin A and B in M1152, respectively (**Figure 7**). This could be  
417 explained by the more active oxidative metabolism of M1152 compared to M145. In M1152  
418 the pool of acetyl-CoA would thus be used to feed the TCA cycle rather than be used for  
419 germicidin biosynthesis.

420 To further understand the cause of the reduced production in M1152, we also measured the  
421 production of germicidin in the intermediate strain M1146 (**Figure 7, Figure S6E**), which does  
422 not feature the *rpoB* mutation but is missing the 4 BGCs also deleted in M1152 (13). The  
423 production rate of germicidin A and B in M1146 was found to be reduced by 27% and 25%,  
424 respectively, compared to M145. This demonstrates that, while the removal of BGCs may  
425 influence polyketide production, a strong reduction appears to be assignable to the *rpoB*  
426 mutation in M1152.

## 427 Discussion

428 In this work, we carried out a multi-omics study to compare the metabolic changes of  
429 *Streptomyces coelicolor* M145 and the BGC-deletion mutant M1152 during batch  
430 fermentation. The defined cultivation medium used in this work was chosen because it  
431 supports sufficient growth and a delayed, well-defined onset of secondary metabolism,  
432 necessary to study the metabolic switch (20). We aimed at defining the metabolic features  
433 differing between the two strains, both during exponential growth and stationary phase  
434 after phosphate depletion.

435 To achieve this from a systems biology perspective, we combined time-course sampled  
436 cultivation and transcriptome analysis with enzyme-constrained genome-scale models  
437 generated with proteome data. Such genome-scale models are extensively used to connect  
438 transcriptome- and proteome data to metabolic fluxes. Leveraging metabolic simulations to

439 contextualize transcriptional changes is mainly impacted by the quality of the computational  
440 model used. Here, two teams joined efforts to improve a consensus model of *S. coelicolor*,  
441 yielding a comprehensive model useful for the scientific community.

#### 442 [Genome-scale models provide hypothesis for slow growth of M1152](#)

443 The reduced growth rate of M1152 is correlated with reduced glucose uptake and enhanced  
444 glutamate uptake compared to M145. This is expected to lead to a less active glycolysis but a  
445 more active TCA cycle, and thus, a more active oxidative metabolism in M1152 compared to  
446 M145. An active oxidative metabolism is known to generate oxidative stress, and indeed, the  
447 *in vivo* data, as well as the genome-scale model, predict an increased oxidative stress in  
448 M1152. The toxicity of oxidative stress might, at least in part, be responsible for the growth  
449 delay of M1152, while the *rpoB* mutation may add to this phenotype, since one of the  
450 functions of the ppGpp-associated RNA polymerase is to promote a growth arrest in  
451 conditions of nutritional stress.

#### 452 [Further development may improve M1152 as host for heterologous expression](#)

453 The strain M1152 has several advantages as a host for heterologous production of secondary  
454 metabolites. The deletion of the 4 major BGCs not only removes presumed competing sinks  
455 for valuable precursors, but also generates a clean background to ease the identification of  
456 novel products by mass spectrometry. M1152 was already proven to be more efficient than  
457 M145 and M1146 in heterologous production of the nitrogen-containing antibiotics  
458 chloramphenicol and congocidine, as well as Act production from reintroduction of its BGC  
459 (13). Strains M1146 and M1152 produce, respectively, 3- to 5-, and 20- to 40-fold more  
460 chloramphenicol and congocidine from respective heterologous clusters than M145.  
461 Furthermore, in strain M1317, derived from M1152 by additional removal of three Type III

462 PKS genes (16), the (re-)introduction of germicidin synthase gave a 10.7 and 7.8-fold increase  
463 in the total germicidin production by M1317 and M1152, respectively. This demonstrated  
464 that the *rpoB* mutation, earlier shown to have a positive impact on the biosynthesis of  
465 secondary metabolites (13), has a higher impact on the production of these compounds than  
466 the deletion of competing precursor sinks, even while it cannot be excluded that  
467 unintended and unknown genetic differences introduced during strain development are  
468 underlying some of the observed behaviours. Nonetheless, the comparative analysis of  
469 M145 and M1152 provides valuable insight to the impact of the *rpoB* mutation on cellular  
470 metabolism and its relationships with antibiotic production, while a dedicated, systematic  
471 comparative analysis of M1152, M1146 (13) and M145 will be necessary to in detail dissect  
472 the overlapping influences of BGC deletion and the *rpoB* mutation (99).

473 As earlier work has suggested a competition for common precursors (acetyl-CoA/malonyl-  
474 CoA) between fatty acids and secondary metabolites biosynthesis (100), it could be  
475 anticipated that the deletion of BGCs would have a positive effect on fatty acids, and thus  
476 TAG biosynthesis, but our data indicate that this is not the case (**Figure 5**).

477

## 478 **Materials and Methods**

### 479 **Sco-GEM consensus model reconstruction and development**

480 A brief description of the model reconstruction process is given in the following section,  
481 while all details are described in the **Supplemental Information**. and in the community  
482 model's GitHub repository (<https://github.com/SysBioChalmers/sco-GEM>). The model is  
483 hosted on GitHub to facilitate further development by the community, and we've also

484 created a channel on Gitter dedicated to Sco-GEM questions and discussions

485 (<https://gitter.im/SysBioChalmers/Sco-GEM>).

486 Protocol for model merging

487 Using iKS1317 (15) as a starting point, additional reactions, metabolites and genes were

488 added from Sco4 (37) and iAA1259 (35). These three models are all based on the preceding

489 model iMK1208. To facilitate model comparison, modified or added reactions and

490 metabolites in Sco4 and iAA1259 were mapped to the iKS1317 namespace by using reaction

491 and metabolite database annotations, reaction equations and metabolite names and

492 formulas. The full list of reactions and metabolites added or modified according to Sco4 and

493 iAA1259 is given in **Data Set S1, Tab 6 - 10**.

494 The next step of the reconstruction process involved mainly manual curations: known flaws

495 and missing gene annotations in iKS1317 and Sco4 were fixed; reactions and metabolites

496 added from Sco4 were given IDs according to the BiGG namespace (56); all reactions,

497 metabolites and genes were given SBO annotations (101) (**Data Set S1, Tab 11**); all possible

498 reactions and metabolites were given MetaNetX (55) and chebi (54) (metabolites only)

499 annotations; the extensive annotation of genes from iAA1259 were expanded to cover 1591

500 of the 1777 genes in Sco-GEM. We also created pseudo-metabolites for the redox cofactors

501 NADH/NADPH and NAD<sup>+</sup>/NADP<sup>+</sup> and introduced them into reactions where the cofactor

502 usage is uncertain.

503 The biomass equation was curated with the following main improvements: 1) Adopting the

504 curation of 2-demethylmenaquinol and menaquinol from iAA1259; 2) Separating the

505 biomass reaction into the pseudometabolites lipid, protein, dna, rna, carbohydrate, cell wall

506 and misc; 3) Updating the coefficients for prosthetic groups based on the proteomics data

507 and information about prosthetic groups for individual proteins from UniProt. Additional  
508 details are given in the **Supplemental Information**.

#### 509 Model reversibility

510 By using python-API (<https://gitlab.com/elad.noor/equilibrador-api>) of eEquilibrator (59) we  
511 calculated the change in Gibbs free energy for 770 reactions (**Data Set S1, Tab 3**).  
512 eEquilibrator can only calculate the change in Gibbs free energy for intracellular reactions (i.e.  
513 not transport and exchange reactions) where all metabolites are mapped to KEGG (51, 52).  
514 The calculations are based on the component contribution method (102). The change in  
515 Gibbs free energy was calculated at standard conditions (25 °C, 1 bar), pH7 and 1mM  
516 concentration of reactants, denoted  $\Delta G^m$  in eEquilibrator. This did not cover any transport or  
517 exchange reactions nor reactions with metabolites lacking KEGG annotation. We then  
518 applied a threshold of -30 kJ/mol to define a reaction as irreversible (103, 104). Using the set  
519 of growth data and knockout data, we evaluated the effect of these changes in reaction  
520 reversibility: by randomly applying these changes to 10 reactions at the time, we identified  
521 single, pair and triplets of reactions that reduced model accuracy when the reversibility was  
522 changed based on the change in Gibbs free energy (**Data Set S1, Tab 12; Supplemental**  
523 **Information**).

#### 524 Analysis and annotation of transport reactions

525 Gene annotations, substrate and transport class information were mostly extracted from  
526 Transport DB 2.0 (105) and TCDB (106). Then, transport proteins were extracted from  
527 IUBMB-approved Transporter Classification (TC) System and categorized into 9 main classes  
528 (**Figure 1F**): 1) ABC transporter; 2) PTS transporter; 3) Proton symporter; 4) Sodium  
529 symporter; 5) Other symporter; 6) Proton antiport; 7) Other antiport; 8) Facilitated diffusion;

530 9) Simple diffusion. For those transport proteins with an ambiguous substrate annotation in  
531 TCDB, the specific substrate annotation was obtain by extracting annotations from KEGG (51,  
532 52), UniProt (57) or through BLAST homology search (107) using a similarity threshold of 90%  
533 **(Supplemental Information; Data Set S1, Tab 4).**

#### 534 [Development of enzymatically constrained \(EcSco-GEM\) model](#)

535 An enzyme-constrained version of the Sco-GEM model (denoted EcSco-GEM) was generated  
536 using GECKO (31). The GECKO method enhances an existing GEM by explicitly constraining  
537 the maximum flux through each reaction by the maximum capacity of the corresponding  
538 enzyme, given by the product of the enzyme abundance and catalytic coefficient. This is  
539 facilitated by splitting both, reactions catalysed by isoenzymes and reversible reactions. The  
540 Sco-GEM v1.1 model was modified using GECKO version 1.3.4. Kinetic data, in the form of  
541  $k_{cat}$  values ( $s^{-1}$ ), were automatically collected from BRENDA (108). If BRENDA did not report a  
542  $k_{cat}$  value for an enzyme, GECKO searched for alternative  $k_{cat}$  values by reducing specificity,  
543 on the level of substrate, enzymatic activity (EC number) and organism. While 4178 out of  
544 4753 queried enzyme activities could be matched to the full EC code, 306 of the matched  
545 activities reported in BRENDA were from *S. coelicolor*. Additionally, six  $k_{cat}$  values were  
546 manually curated, and a thorough explanation and reasoning behind these modifications are  
547 given in the **Supplemental Information**. The NAD(H)/NAD(P)H pseudo-reactions were  
548 blocked to avoid infeasible loops.

549 Then, separate models were created for each strain (the gene clusters for actinorhodin,  
550 undecylprodigiosin, CDA and coelimycin P1 were removed to create M1152) and for each  
551 time point by using estimated growth, uptake rates of glutamate and glucose, secretion  
552 rates of undecylprodigiosin, germicidin A and B and proteome measurements (**Supplemental**



553 **Information**). These time point specific models (9 time points for M145, 8 time points for  
554 M1152) were used to analyse the activity in individual metabolic pathways through random  
555 sampling (65). We also created one EcSco-GEM model for each strain with a global  
556 constraint on the protein usage instead of specific protein usage, which were used for model  
557 quality control.

#### 558 [Continuous integration and quality control with memote](#)

559 Validation and quality assessment of Sco-GEM is carried out using the test-suite in memote  
560 (42). Memote provides by default a large range of tests, which we have used to identify  
561 issues and possible improvements. The test suite reports descriptive model statistics such as  
562 the number of genes, reactions and metabolites, and also checks the presence of SBO terms  
563 and annotations, the charge and mass balance of all reactions, the network topology and  
564 find energy-generating cycles (109). Additionally, we incorporated custom tests into the  
565 memote test-suite to automatically compare predicted phenotypes with experimental data  
566 in different growth media and for different knockout mutants. The experimental growth and  
567 knockout data are extracted from (15). Memote version 0.9.12 was used in this work, and  
568 the full memote report for Sco-GEM is given in the **Supplemental Information**. As a separate  
569 evaluation, we applied the method for identifying internal and unrealistic energy-generating  
570 cycles by (110) , and no such cycles were found in Sco-GEM.

571 The simplest use of memote is generating snapshot reports showing the current state of the  
572 model. However, by integrating Travis CI [<https://travis-ci.com/>] into the gitHub repository,  
573 memote can be used to create a continuous report displaying how each commit affects the  
574 model quality.

## 575 Random sampling, normalization and pathway analysis

576 Because of the huge number of reactions in the EcSco-GEM, it is challenging to sample the  
577 solution space appropriately: we have chosen to use the method provided in the Raven  
578 Toolbox 2 (37, 65), which samples the vertices of the solution space. The drawback of this  
579 method is that it will not result in a uniform sampling of the solution space. However, it is  
580 more likely to span the entire solution space and also not prone to get stuck in extremely  
581 narrow parts of the solution space, which may happen with variants of the hit-and-run  
582 algorithm (111–113). For each of the time points for each strain (17 different conditions in  
583 total) we generated 5000 random flux distributions with Gurobi as the solver. The reactions  
584 catalysed by isoenzymes were combined into the set of reactions in Sco-GEM and the  
585 reactions providing protein for each reaction. The mean of the 5000 flux distributions for  
586 each metabolic reaction was used in the following analysis.

587 Finally, for each of the 17 conditions, the mean fluxes were normalized by the CO<sub>2</sub>  
588 production rate. Then, the normalized mean fluxes were summarized for each metabolic  
589 pathway by using the curated pathway annotations, and we consider this a measure of the  
590 metabolic activity in each pathway.

591 Since glucose and glutamate uptake rates, as well as growth rates were significantly different  
592 in the two strains and at different time points, normalization of the data was necessary to  
593 compare flux distributions. We tested various proxies as indicators of overall metabolic  
594 activity for normalization, namely CO<sub>2</sub> production; the total carbon uptake from glucose and  
595 glutamate; growth rate and mean flux value. As golden standard, we compared the fluxes  
596 through individual reactions that are well documented to change in M145 in response to the  
597 phosphate depletion (**Figure S8**). Normalization based on CO<sub>2</sub> production was tested and

598 gave similar results than the data normalized on total carbon uptake from glucose and  
599 glutamate (**Figure S8A and S8B**). The data normalized by the sum of fluxes showed similar  
600 patterns as those achieved by glucose/glutamate and CO<sub>2</sub>-normalized data but was noisier  
601 (**Figure S8C**). Considering the huge differences in growth rate, the growth-normalized data  
602 masked any other flux patterns (**Figure S8D**). The fact that different normalizations provided  
603 similar differences in metabolic fluxes proved that the inferred changes in metabolism were  
604 not artefacts of the normalization method but represent true metabolic activity of each  
605 strain.

606 [Strains, cultivation conditions, sampling procedures, and analyses of media](#)  
607 [components and antibiotics box](#)

608 Experiments were performed using strain M145 of *S. coelicolor* A3(2) and its derivatives  
609 M1146 and M1152. The latter two are lacking the 4 major BGCs for actinorhodin (Act),  
610 undecylprodigiosin (Red), coelimycin P1 (Cpk), and calcium-dependent antibiotic (CDA),  
611 while M1152 is also carrying the pleiotropic, previously described antibiotic production  
612 enhancing mutation *rpoB* [S433L] (13, 22). All strains were kindly provided by Mervyn Bibb at  
613 John-Innes-Centre, Norwich, UK.

614 Triplicate cultivations of the strains were performed based on germinated spore inoculum  
615 on 1.8 L phosphate-limited medium SSBM-P, applying all routines of the optimized  
616 submerged batch fermentation strategy for *S. coelicolor* established and described before  
617 (20). All media were based on ion-free water, and all chemicals used were of analytical  
618 grade. In brief, spore batches of M145, M1146 and M1152 were generated by cultivation on  
619 soy flour-mannitol (SFM) agar plates (114), harvesting by scraping off spores and suspension  
620 in 20% (v/v) glycerol, and storage in aliquots at -80 °C. 10<sup>9</sup> CFU of spores of each strain were

621 germinated for 5 hours at 30 °C and 250 rpm in 250 mL baffled shake-flasks with 2 g of 3 mm  
622 glass beads and 50 mL 2x YT medium (115). The germinated spores were harvested by  
623 centrifugation (3200 x g, 15 °C, 5 min) and re-suspended in 5 mL ion-free water. An even  
624 dispersion of the germinated spores was achieved by vortex mixing (30 s), ensuring  
625 comparable inocula among biological replicas. Each bioreactor (1.8 liter starting volume  
626 culture medium in a 3-liter Applikon stirred tank reactor) was inoculated with 4.5 mL  
627 germinated spore suspension (corresponding to  $9 \times 10^8$  CFU). Phosphate-limited medium  
628 SSBM-P (8) consisted of Na-glutamate, 55.2 g/L; D-glucose, 40 g/L;  $MgSO_4$ , 2.0 mM;  
629 phosphate, 4.6 mM; supplemented minimal medium trace element solution SMM-TE (115),  
630 8 mL/L and TMS1, 5.6 mL/L. TMS1 consisted of  $FeSO_4 \times 7 H_2O$ , 5 g/L;  $CuSO_4 \times 5 H_2O$ , 390  
631 mg/L;  $ZnSO_4 \times 7 H_2O$ , 440 mg/L;  $MnSO_4 \times H_2O$ , 150 mg/L;  $Na_2MoO_4 \times 2 H_2O$ , 10 mg/L;  $CoCl_2 \times$   
632  $6 H_2O$ , 20 mg/L, and HCl, 50 mL/L. Clerol FBA 622 fermentation defoamer (Diamond  
633 Shamrock Scandinavia) was added to the growth medium before inoculation. Throughout  
634 fermentations, pH 7.0 was maintained constant by automatic addition of 2 M HCl. Dissolved  
635 oxygen levels were maintained at a minimum of 50% by automatic adjustment of the stirrer  
636 speed (minimal agitation 325 rpm). The aeration rate was constant 0.5 L/(L x min) sterile air.  
637 Dissolved oxygen, agitation speed and carbon dioxide evolution rate were measured and  
638 logged on-line, while samples for the determination of cell dry weight, levels of growth  
639 medium components and secondary metabolites concentrations, as well as for  
640 transcriptome and proteome analysis were withdrawn throughout the fermentation trials as  
641 indicated in **Figure 2B**. For transcriptome analysis, 3 × 4 ml culture sample were applied in  
642 parallel onto three 0.45 µm nitrocellulose filters (Millipore) connected to vacuum. The  
643 biomass on each filter was immediately washed twice with 4 ml double-autoclaved ion-free  
644 water pre-heated to 30 °C, before the filters were collected in a 50 ml plastic tube, frozen in

645 liquid nitrogen and stored at -80 °C until RNA isolation. For proteome analysis, 5 ml samples  
646 were taken and centrifuged (3200 x g, 5 min, 4 °C), and the resulting cell pellets frozen  
647 rapidly at -80 °C until further processing.

648 Levels of phosphate were measured spectrophotometrically by using the SpectroQuant  
649 Phosphate test kit (Merck KGaA, Darmstadt, Germany) following the manufacturer's  
650 instructions after downscaling to 96-well plate format. D-glucose and L-glutamate  
651 concentrations were determined by LC-MS using suitable standards, and measured  
652 concentrations were used to estimate specific uptake and excretion rates.

653 Undecylprodigiosin (Red) levels were determined spectrophotometrically at 530 nm after  
654 acidified methanol extraction from the mycelium (116). To determine relative amounts of  
655 actinorhodins (determined as total blue pigments, TBP), cell culture samples were treated  
656 with KOH (final concentration 1 M) and centrifuged, and the absorbance of the supernatants  
657 at 640 nm was determined (116). Quantification of germicidin A and B was performed using  
658 targeted LC-MS analytics.

## 659 [Proteomics](#)

### 660 [Sample preparation and NanoUPLC-MS analysis](#)

661 Quantitative proteomics were performed using pipeline previously described (117).

662 Mycelium pellets for proteome analysis were thawed and resuspended in the remaining  
663 liquid. 50 µL re-suspended mycelium was withdrawn and pelleted by centrifugation. 100 µL  
664 lysis buffer (4% SDS, 100 mM Tris-HCl pH 7.6, 50 mM EDTA) was added, and samples were  
665 sonicated in a water bath sonicator (Biorupter Plus, Diagenode) for 5 cycles of 30 s high  
666 power and 30 s off in ice water. Cell debris was pelleted and removed by centrifugation.

667 Total protein was precipitated using the chloroform-methanol method described before

668 (118). The pellet was dried in a vacuum centrifuge before dissolving in 0.1% RapiGest SF  
669 surfactant (Waters) at 95 °C. The protein concentration was measured at this stage using  
670 BCA method. Protein samples were then reduced by adding 5 mM DTT, followed by  
671 alkylation using 21.6 mM iodoacetamide. Then trypsin (recombinant, proteomics grade,  
672 Roche) was added at 0.1 µg per 10 µg protein. Samples were digested at 37 °C overnight.  
673 After digestion, trifluoroacetic acid was added to 0.5% followed by incubation at 37 °C for 30  
674 min and centrifugation to remove MS interfering part of RapiGest SF. Peptide solution  
675 containing 8 µg peptide was then cleaned and desalted using STAGE-Tipping technique  
676 (119). Final peptide concentration was adjusted to 40 ng/µL using sample solution (3%  
677 acetonitrile, 0.5% formic acid) for analysis.

678 200 ng (5 µL) digested peptide was injected and analysed by reversed-phase liquid  
679 chromatography on a nanoAcquity UPLC system (Waters) equipped with HSS-T3 C18 1.8 µm,  
680 75 µm X 250 mm column (Waters). A gradient from 1% to 40% acetonitrile in 110 min  
681 (ending with a brief regeneration step to 90% for 3 min) was applied. [Glu<sup>1</sup>]-fibrinopeptide B  
682 was used as lock mass compound and sampled every 30 s. Online MS/MS analysis was done  
683 using Synapt G2-Si HDMS mass spectrometer (Waters) with an UDMS<sup>E</sup> method set up as  
684 described in (120).

#### 685 Data processing and label-free quantification

686 Raw data from all samples were first analysed using the vendor software ProteinLynx Global  
687 SERVER (PLGS) version 3.0.3. Generally, mass spectrum data were generated using an MS<sup>E</sup>  
688 processing parameter with charge 2 lock mass 785.8426, and default energy thresholds. For  
689 protein identification, default workflow parameters except an additional acetyl in N-terminal  
690 variable modification were used. Reference protein database was downloaded from

691 GenBank with the accession number NC\_003888.3. The resulted dataset was imported to  
692 ISOQuant version 1.8 (120) for label-free quantification. Default high identification  
693 parameters were used in the quantification process. TOP3 result was converted to PPM  
694 (protein weight) and send to the modelers and others involved in interpreting the data (**Data**  
695 **Set S1, Tab 13**).

696 TOP3 quantification was filtered to remove identifications meet these two criteria: 1.  
697 identified in lower than 70% of samples of each strain and 2. sum of TOP3 value less than  $1 \times$   
698  $10^5$ . Cleaned quantification data was further subjected to DESeq2 package version 1.22.2  
699 (29) and PCA was conducted after variance stabilizing transformation (vst) of normalized  
700 data.

## 701 [Transcriptomics](#)

### 702 RNA extraction and quality control

703 Bacteria were lysed using RNeasy Protect Bacteria (Qiagen) and following the manufacturer's  
704 instruction. Briefly, filters containing bacteria were incubated with 4 ml of RNeasy Protect  
705 Bacteria reagent. After centrifugation, resulting samples were lysed using 500  $\mu$ l of TE buffer  
706 (10 mM Tris-Cl, 1 mM EDTA, pH 8.0) containing 15 mg/ml lysozyme using 150-600  $\mu$ m  
707 diameter glass beads (Sigma) agitated at 30 Hz for 5 minutes in the TissueLyser II (Qiagen).  
708 Total RNA was extracted using RNeasy mini kit (Qiagen) and 700  $\mu$ l of the resulting lysate  
709 complemented with 470  $\mu$ l of absolute ethanol. RNAase-free DNase set (Qiagen) and  
710 centrifugation steps were performed to prevent DNA and ethanol contamination. Elution  
711 was performed using 30  $\mu$ l of RNase-free water and by reloading the eluate on the column to  
712 improve the RNA yield. The RNA concentration was measured using Qubit RNA BR Assay Kit  
713 (ThermoFisher Scientific), RNA purity was assessed using A260/A280 and A260/A230 ratio

714 using the Nano Drop ND-1000 Spectrophotometer (PEQLAB). RNA Integrity Number was  
715 estimated using RNA 6000 Nano Kit (Agilent) and the Bioanalyzer 2100 (Agilent).

#### 716 Library preparation and sequencing

717 A total of 1 µg of total RNA was subjected to rRNA depletion using Ribo-Zero rRNA Removal  
718 Kit Bacteria (Illumina). The cDNA libraries were constructed using the resulting tRNA and the  
719 NEBNext Ultra II Directional RNA Library Prep Kit (NEB). Libraries were sequenced as single-  
720 reads (75 bp read length) on an Illumina NextSeq500 platform at a depth of 8–10 million  
721 reads each.

#### 722 RNA-seq data assessment and analysis

723 Sequencing statistics including the quality per base and adapter content assessment of  
724 resulting transcriptome sequencing data were conducted with FastQC v0.11.5 (121). All  
725 reads mappings were performed against the reference strain of *Streptomyces coelicolor*  
726 A3(2) (RefSeq ID NC\_003888.3). The mappings of all samples were conducted with HISAT2  
727 v2.1.0 (122). As parameters, spliced alignment of reads was disabled, and strand-specific  
728 information was set to reverse complemented (HISAT2 parameter --no-spliced-alignment  
729 and --rna-strandness "R"). The resulting mapping files in SAM format were converted to BAM  
730 format using SAMtools v1.6 (123). Mapping statistics, including strand specificity estimation,  
731 percentage of mapped reads and fraction exonic region coverage, were conducted with the  
732 RNA-seq module of QualiMap2 v2.2.2-dev (124). Gene counts for all samples were  
733 computed with featureCounts v1.6.0 (28) based on the annotation of the respective  
734 reference genome, where the selected feature type was set to transcript records  
735 (featureCounts parameter -t transcript).



736 Normalization and differential gene expression

737 Raw count files were imported into Mayday SeaSight (125) for common, time-series-wide  
738 normalization. For this, the raw counts of all biological replicates of one strain across the  
739 time-series were log<sub>2</sub>-transformed (with pseudocount of +1 for the genes with zero counts)  
740 and then quantile-normalized. To make the two normalized time-series data of M154 and  
741 M1152 comparable, they were again quantile-normalized against each other. The  
742 normalized RNA-seq data are provided in **Data Set S1, Tab 14**.

743 Differentially expressed genes were identified by ANOVA using Orange (v3.2) and the  
744 bioinformatic toolkit (v), with FDR of <0.01 and a minimal fold enrichment >1 for at least one  
745 aligned time point. Genes with low expression (log<sub>2</sub> < 5 for both strains and time points)  
746 were not considered for further analysis. The differentially expressed genes were  
747 subsequently scaled to the expression average and clustered by K-means. Visualization of  
748 genes and clusters were performed in python (v3.7) with matplotlib (v3.1.1). For this, the  
749 time-series of M145 and M1152 were aligned such that in the visual representation, the  
750 expression profiles of the two strains are aligned relative to the time point of phosphate  
751 depletion. Both DAVID (126, 127) and the string database (128) was used to evaluate the  
752 function of each cluster, identifying overrepresentation of function groups based on GO  
753 annotation or text mining. Identified differential clusters or regulons were extracted from  
754 literature and plotted (**Data Set S1, Tab 5; Figure S7**).

755

## 756 Data and Software Availability

### 757 Model repository

758 The model is hosted and developed in an open repository on GitHub:

759 <https://github.com/SysBioChalmers/Sco-GEM>. Here, the latest version of the Sco-GEM is

760 available in both YAML and SBML level 3 Version 1. Additionally, users can see all details of

761 the model reconstruction and contribute to further model development by posting issues or

762 suggest changes. This should encourage further, incremental development of Sco-GEM by

763 the community.

### 764 Proteome data

765 The proteomics data have been deposited to the ProteomeXchange Consortium via the

766 PRIDE (129) partner repository with the dataset identifier PXD013178 and

767 10.6019/PXD013178. Normalized proteome data is also available in **Data Set S1, Tab 13**.

### 768 Transcriptomics data

769 All high-throughput sequencing data have been deposited in NCBI's Gene Expression

770 Omnibus and are accessible under accession number GSE132487 (M145) and GSE132488

771 (M1152). Normalized counts are also found in **Data Set S1, Tab 14**.

## 772 Author contributions

773 Conceptualization, E.K., E.A., A.W., S.S., A.S.Y. and T.K. Methodology and software, E.K., S.S.,

774 A.S.Y. and T.K. Validation and formal analysis, C.D., K.N., D.V.D., S.S., T.K., E.K. Investigation,

775 T.K., A.W., S.S., E.K. Data curation, S.S., T.K. Writing - original draft, S.S., T.K., D.V.D., C.D.,

776 K.N. Writing – review & editing, all authors. Visualization, S.S., E.K., C.D., D.V.D. Supervision,

777 A.W., E.A., E.K., G.W. Project administration, A.W. Funding acquisition: A.W., E.K., E.A., G.W.

## 778 Acknowledgements

779 The authors would like to acknowledge Bogdan I. Florea of Leiden University, Leiden,  
780 Netherlands, for running and monitoring the proteome measurements, and the bio-organic  
781 synthesis group at Leiden University for providing the opportunity to use their  
782 instrumentation. The authors would also like to acknowledge co-workers at SINTEF Industry,  
783 Trondheim, Norway: Ingemar Nærdal, Anna Lewin and Kari Hjelen for running the batch  
784 fermentations and Anna Nordborg, Janne Beate Øiaas and Tone Haugen for performing  
785 offline analyses and the germicidin analytics. The RNA-Seq sequencing was carried out by  
786 c.ATG, Tübingen, Germany.

787 This study was conducted in the frame of ERA-net for Applied Systems Biology (ERA-SysAPP)  
788 project SYSTERACT and the project INBioPharm of the Centre for Digital Live Norway  
789 (Research Council of Norway grant no. 248885), with additional support of SINTEF internal  
790 funding. The authors declare no conflict of interest.

791 Figures

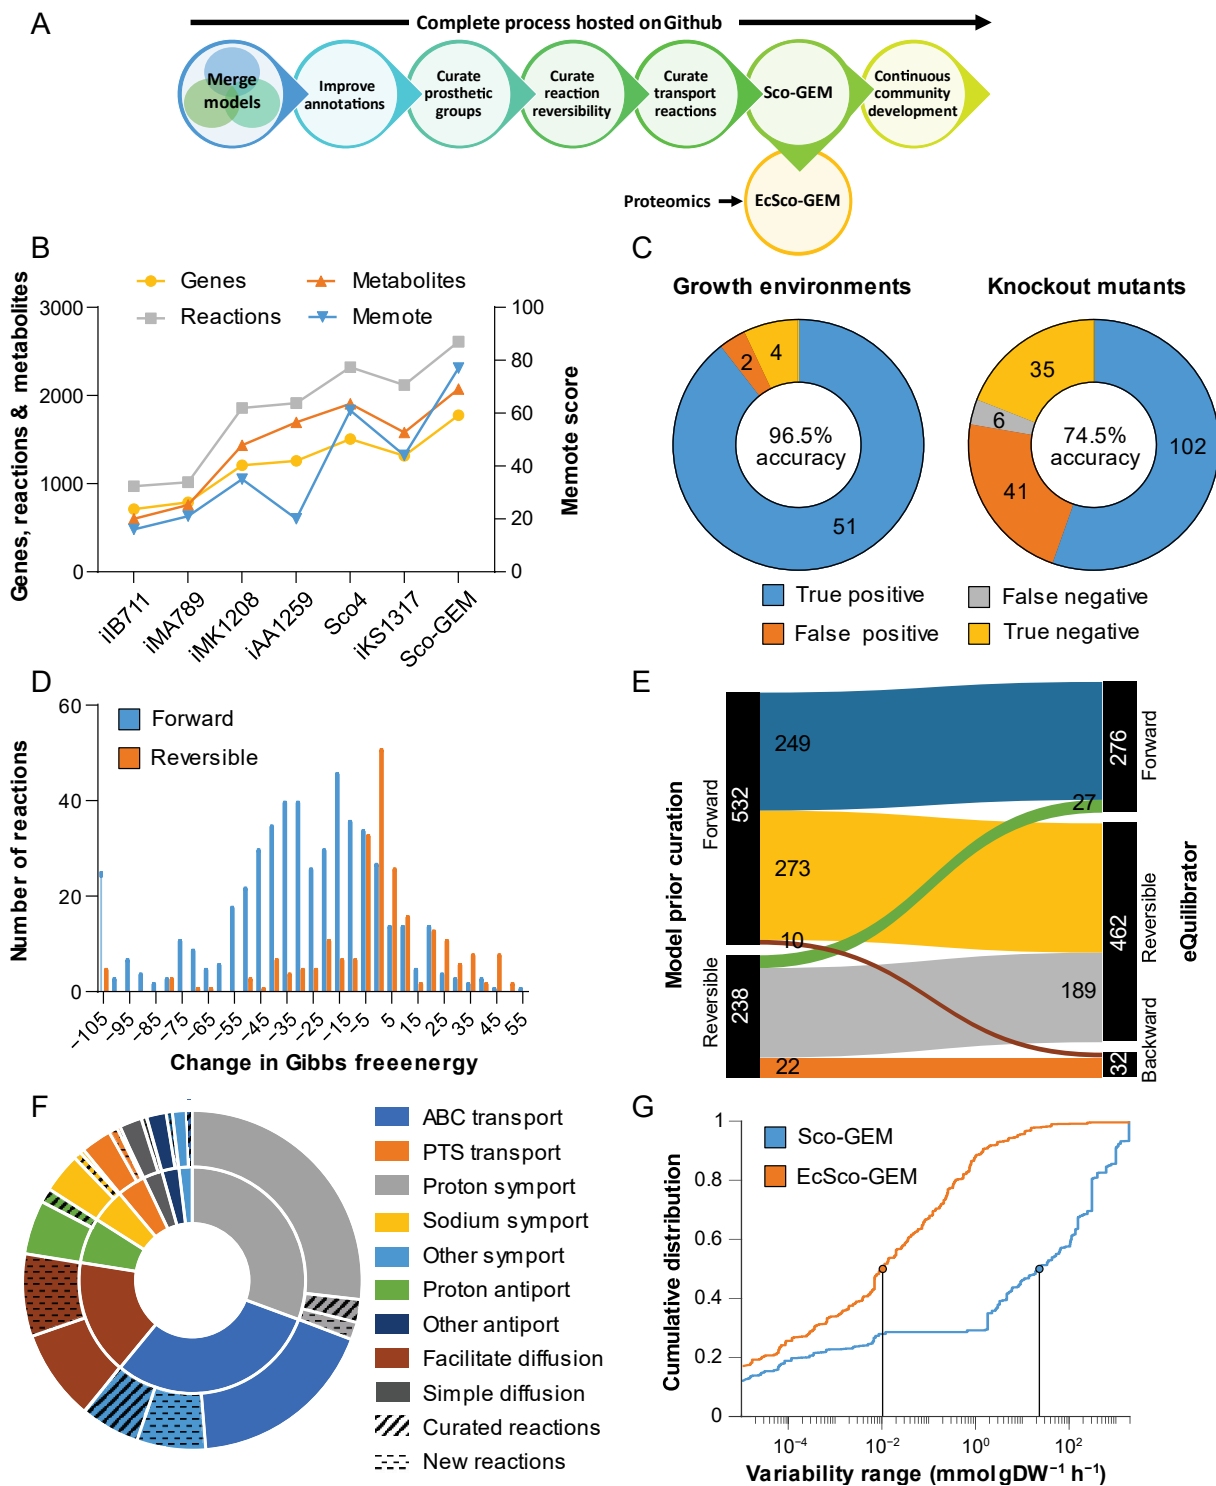

792

793 **Figure 1: Sco-GEM development and analysis.** A) Schematic overview of the various steps in

794 the Sco-GEM reconstruction process. B) The overall memote score and number of genes,

795 reactions and metabolites for the 7 published *S. coelicolor* GEMs. C) Assessment of the model

796 quality by comparing *in vivo* observations with *in silico* predictions. D) The change in Gibbs  
797 free energy for 770 reactions that were annotated as either reversible or forward irreversible  
798 in the model prior curation of reaction reversibility. The histogram is truncated at -105 kJ/mol,  
799 and more negative values are assigned to the leftmost bin. E) Analysis and comparison of the  
800 directionality and reversibility of reactions prior curation and the direction inferred from the  
801 change in Gibbs free energy as estimated by eQuilibrator. F) Overview of the 369 transport  
802 reactions included in Sco-GEM, whereof 42 were curated and 65 added during this work. The  
803 inner ring categorizes the reactions into 9 different subgroups, while the outer ring displays  
804 the amount of curated and added reactions within each category. G) Comparison of  
805 cumulative flux variability distributions, demonstrating that the incorporation of kinetic  
806 coefficients in EcSco-GEM greatly constrains the solution space.

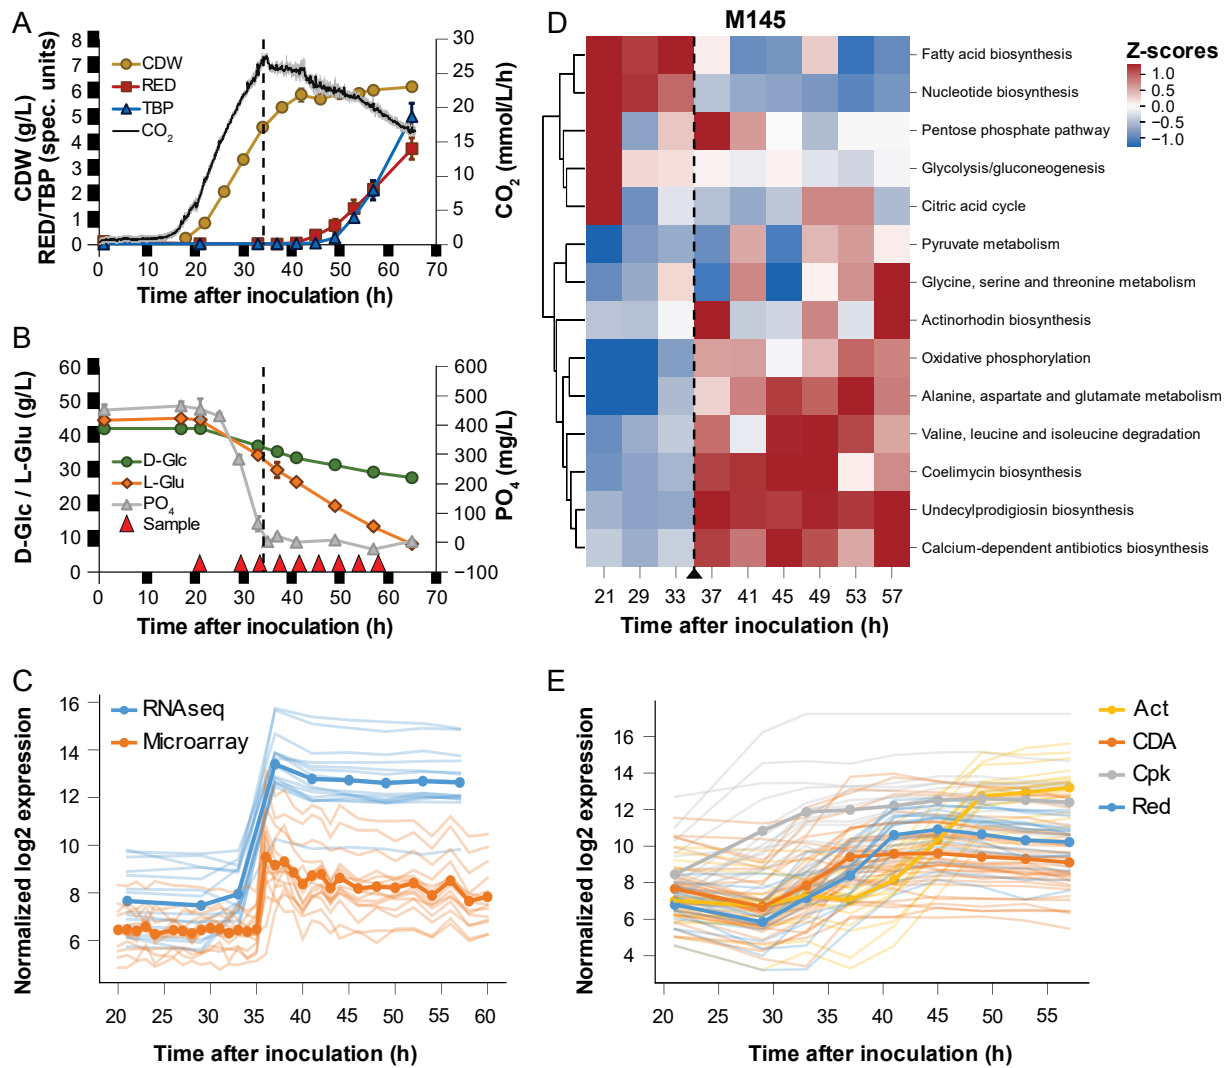

807

808 **Figure 2: Batch cultivation of *S. coelicolor* M145 and the effect of phosphate depletion.**

809 Compounds produced (A) and consumed (B) during batch fermentation of *S. coelicolor* M145.

810 Time points for sampling for transcriptome and proteome analysis are indicated with red

811 triangles. The dashed vertical line indicates when phosphate in the medium has been

812 depleted. Error bars are standard deviations of three biological replicates. CDW, Cell Dry

813 Weight; Red, undecylprodigiosin; TBP, Total Blue Pigments/actinorhodins; CO<sub>2</sub> volume

814 corrected respiration; D-Glc, D-glucose; L-Glu, L-glutamate; PO<sub>4</sub>, phosphate. C) Comparison of

815 previously published microarray data (8) and RNA-seq data (this study) for genes previously

816 found to respond to phosphate depletion (8). D) Clustered heatmap of CO<sub>2</sub>-normalized Z-

817 scores for each of the top 10 varying pathways plus the pathways for the 4 major BGCs in

818 M145, as revealed by simulations with the proteomics-integrated EcSco-GEM model. The  
 819 dashed vertical line indicates the time point of the metabolic switch. E) RNA-seq data of the 4  
 820 major BGCs show the onset of biosynthesis of actinorhodin (Act), calcium-dependent  
 821 antibiotic (CDA), coelimycin P1 (Cpk) and undecylprodigiosin (Red) at different time points  
 822 during the batch fermentations of M145.

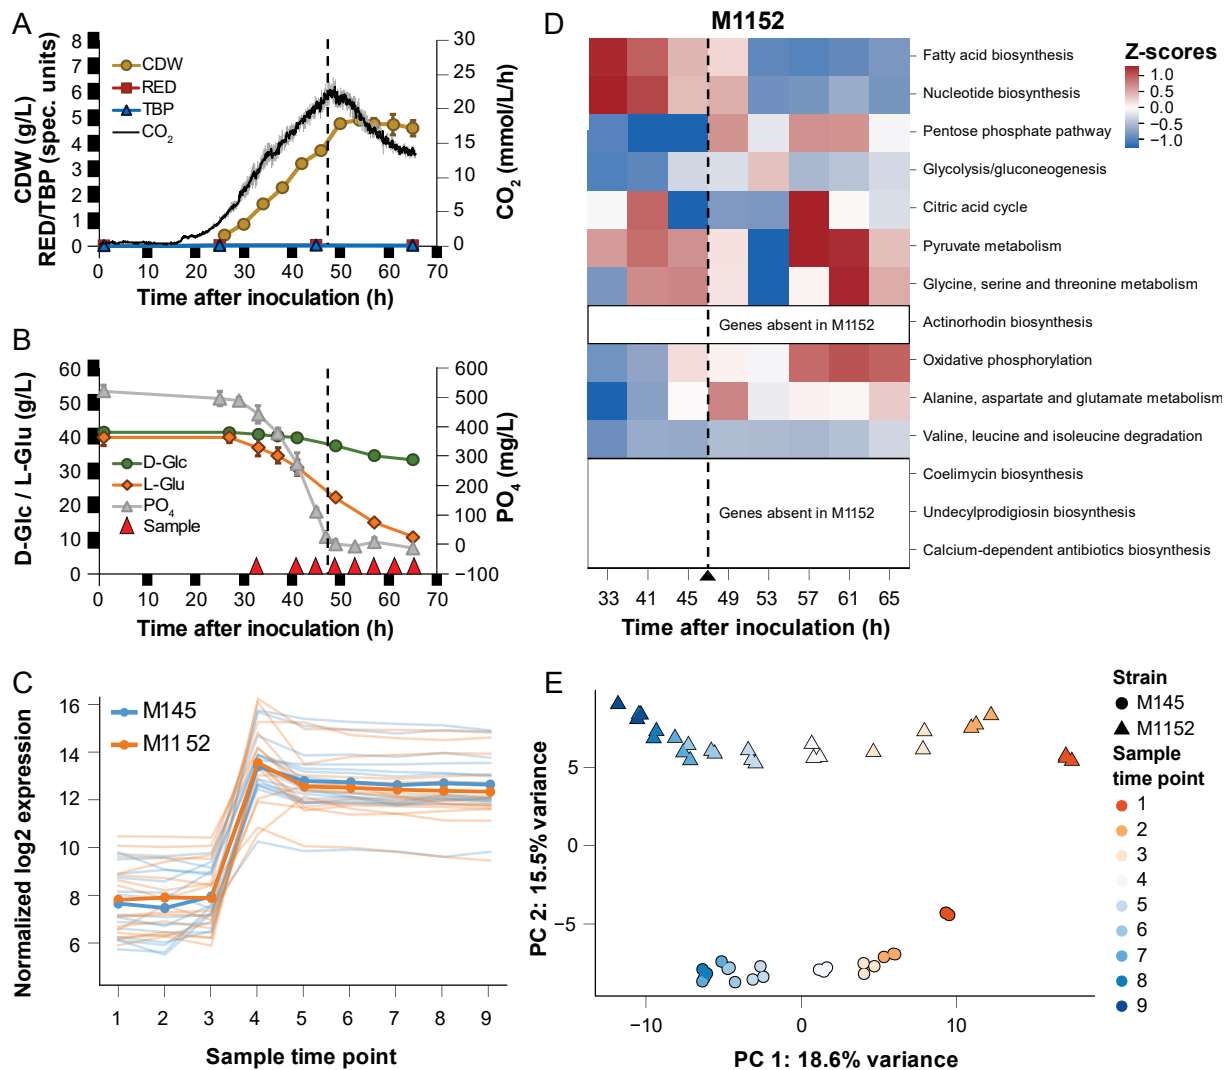

823

824 **Figure 3: Batch cultivation of *S. coelicolor* M1152.** Compounds produced (A) and consumed  
 825 (B) during batch fermentation of *S. coelicolor* M1152. Time points for sampling for  
 826 transcriptome and proteome analysis are indicated with red triangles. The dashed vertical line  
 827 indicates when phosphate in the medium has been depleted. Error bars are standard

828 deviations of three biological replicates. CDW, Cell Dry Weight; Red, undecylprodigiosin; TBP,  
829 Total Blue Pigments/actinorhodins; CO<sub>2</sub>, volume corrected respiration; D-Glc, D-glucose; L-  
830 Glu, L-glutamate; PO<sub>4</sub>, phosphate. C) Alignment of sample time points of M145 and M1152  
831 cultivations based on the expression profiles of genes that were earlier found to respond to  
832 phosphate depletion in respect to the metabolic switch (8). D) Clustered heatmap of  
833 proteomics data for M145 (triangles) and M1152 (circles), for each time-point and culture.  
834 The first principal component separates the time points, while the second principal  
835 component separates the two strains. E) CO<sub>2</sub>-normalized Z-scores of pathway fluxes predicted  
836 by EcSco-GEM for 10 of the most varying pathways in M145 and M1152. The data for M145  
837 **(Figure 2D)** and M1152 are standardized together to make values and colours comparable. E)  
838 Principle component analysis of the proteomics data for M145 (triangles) and M1152 (circles),  
839 for each time-point and culture. The first principal component separates the time points while  
840 the second principal component separates the two strains.



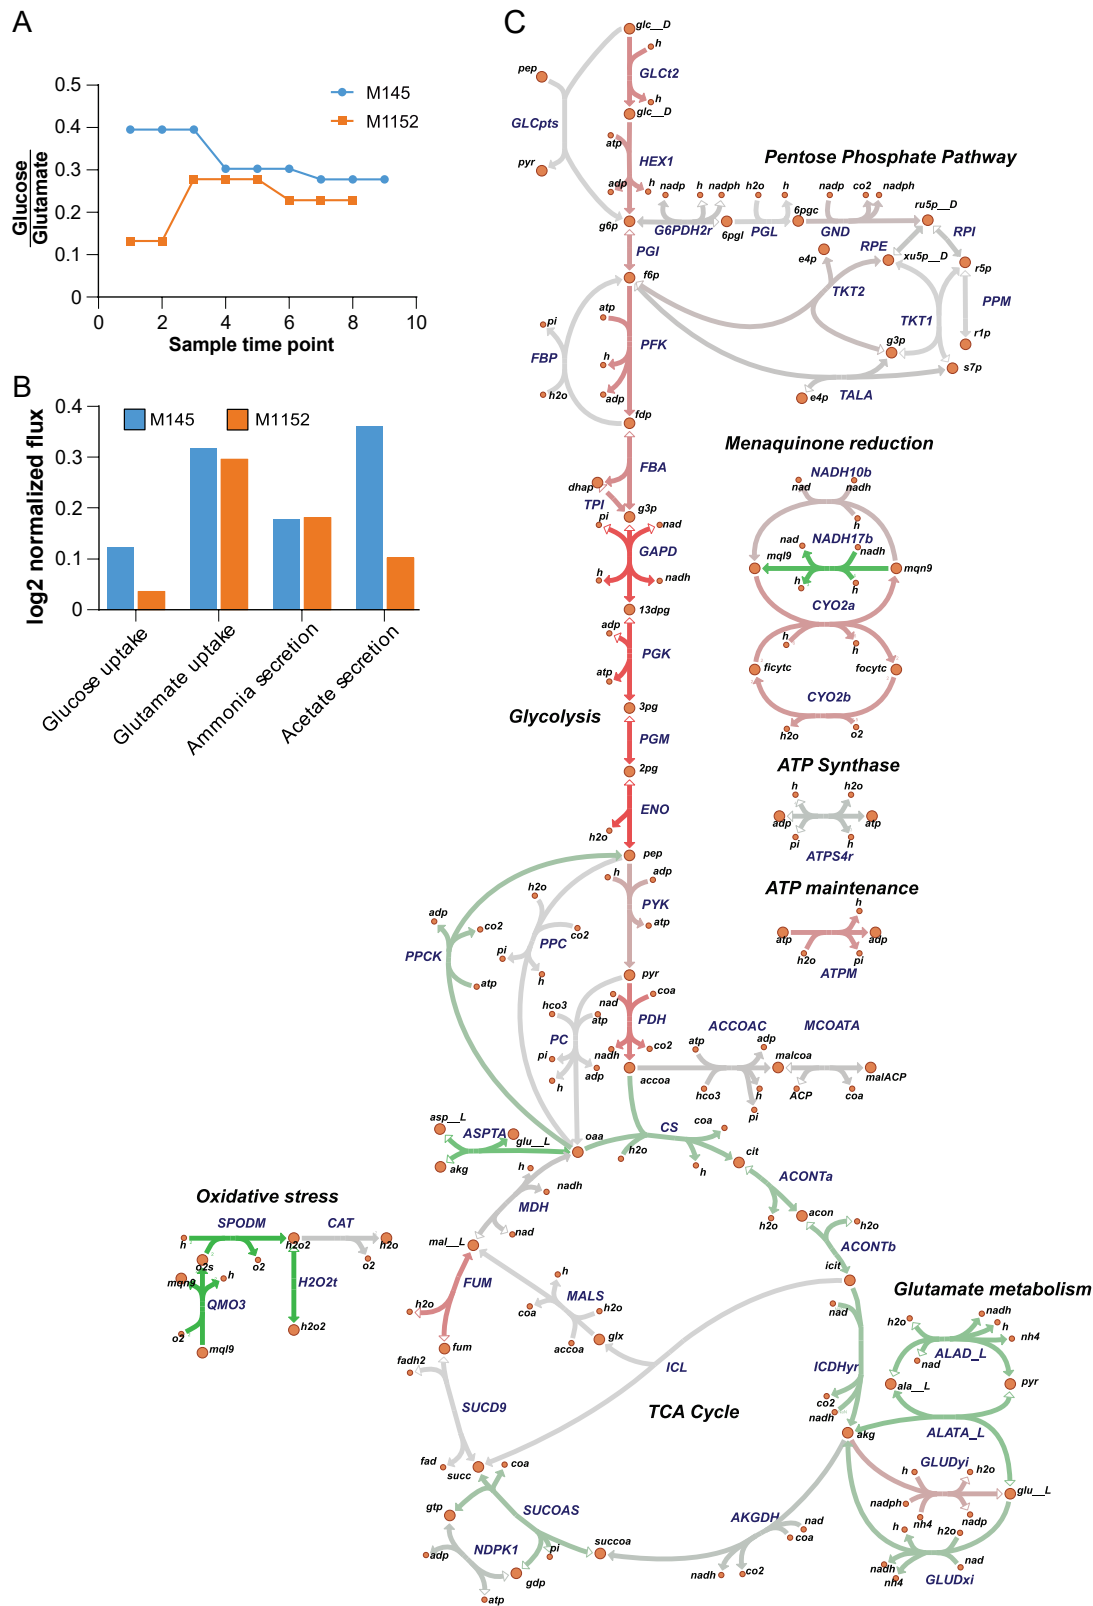

841

842 **Figure 4: Predicted carbon fluxes in M145 and M1152.** A) The ratio between estimated uptake  
 843 rates of glucose and glutamate showing that M1152 acquires a smaller part of its carbon from  
 844 glucose compared to M145. B) Roughly half of the nitrogen from glutamate is excreted as

845 ammonium (both strains), while higher uptake of glucose in M145 leads to more excretion of  
846 acetate. C) Comparison of predicted fluxes for the second sampling time points for M145 and  
847 M1152, i.e. after 29 and 41 hours, respectively. The second time point for each strain was  
848 chosen because the estimated uptake rates are more reliable than the first time point. The  
849 strength of the colour of the lines correspond to the flux difference between the strains; green  
850 reactions have higher flux in M1152, and red reactions have higher flux in M145. Note the  
851 reduced biomass-specific uptake rate of glucose and increased oxidative stress in M1152.

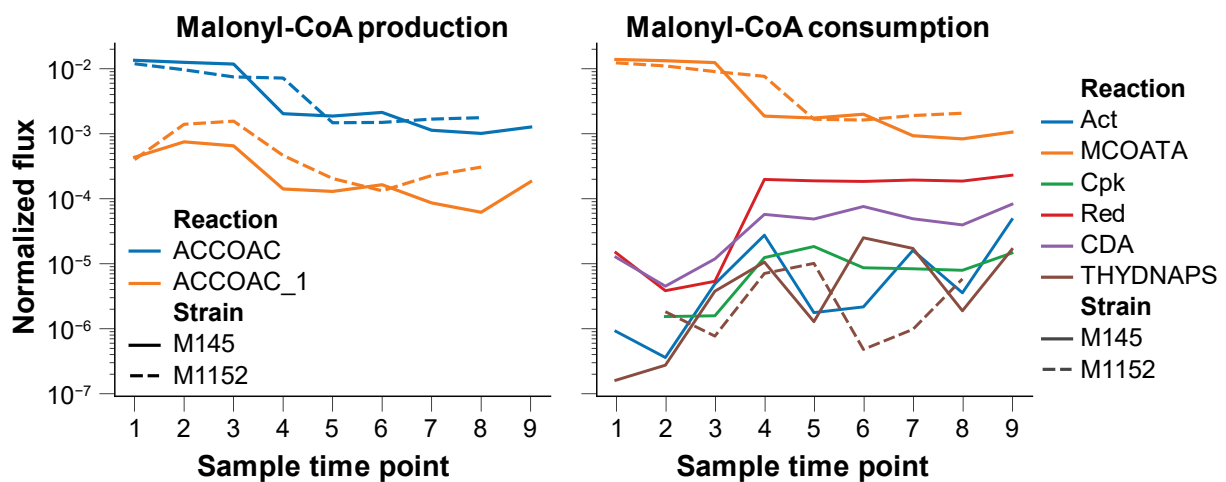

853 **Figure 5: Production and consumption of malonyl-CoA as the branching point between fatty**  
854 **acid biosynthesis and production of polyketides.** From EcSco-GEM predictions, a reduced  
855 malonyl-CoA production (left panel) by both acetyl-CoA carboxylase (ACCOAT; blue) and  
856 acetyl-CoA carboxytransferase (ACCOAT\_1; orange) is observed in both strains. Most of the  
857 malonyl-CoA is consumed by fatty acid biosynthesis through malonyl-CoA-ACP transacylase  
858 (MCOATA), even after metabolic switching, and this consumption balances the malonyl-CoA  
859 production. The other main sinks for malonylmalonyl-CoA are the pathways encoded by the 4  
860 major BGCs (Act, Cpk, Red and CDA) in addition to biflavin synthesis (THYDNAPS).

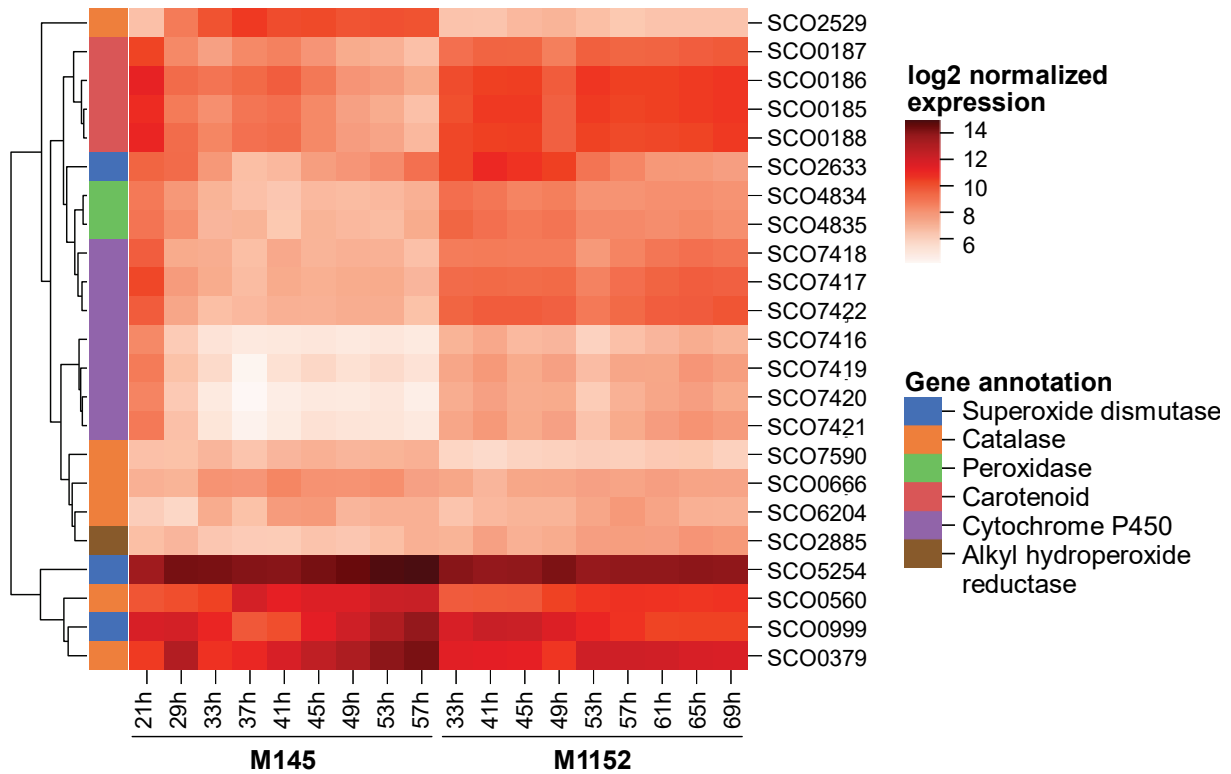

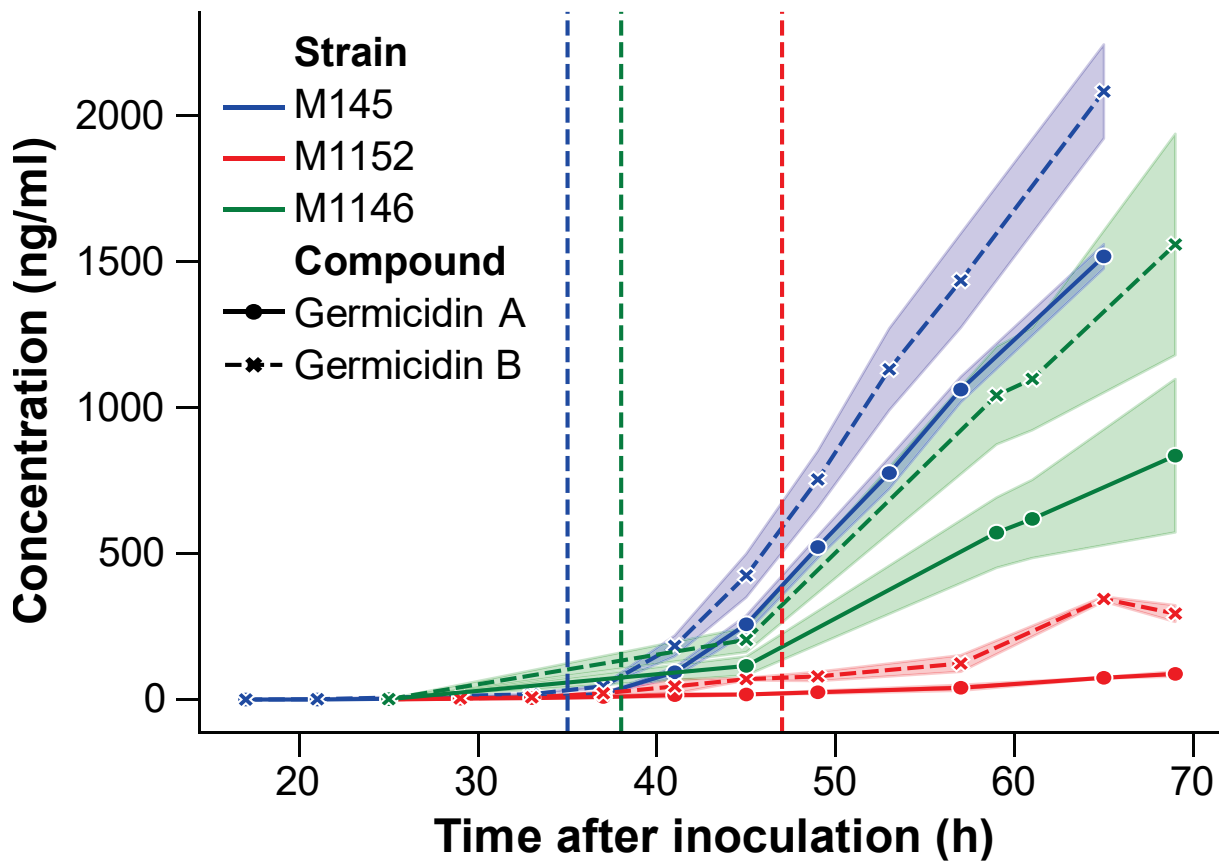

866

867 **Figure 7: Concentrations of germicidin A and B produced by M145, M1146 and M1152.** The  
868 shaded regions display the uncertainty range ( $\pm 1$  standard deviation) based on three replicate  
869 cultivations. Germicidin production rates after the metabolic switch (in  $\text{ng ml}^{-1} \text{ hour}^{-1}$ ) are:  
870 41.4 (A) and 75.5 (B) for M145; 30.2 (A) and 56.4 (B) for M1146; 3.3 (A) and 13.3 (B) for M1152.  
871 Note that the growth rate is different between the strains, displayed by the vertical lines  
872 representing phosphate depletion at 35, 38 and 47 hours for M145, M1146 and M1152,  
873 respectively.

#### 874 [Supplemental Figures](#)

875 **Figure S1: Reaction subsystems and origin.** The number of reactions in Sco-GEM in each of  
876 the 15 subsystems, and from which model they originate from. The other reactions (orange)  
877 are added during reconstruction of Sco-GEM.

878 **Figure S2: Gene clusters associated with metabolic switch.** RNA-seq (left column) and  
879 proteomics (right column) from M145 of the 8 gene clusters associated with the metabolic  
880 switch as previously identified (8). The 8 clusters are: A) genes related to ribosomal proteins;  
881 B) genes related to nitrogen metabolism; C) Cpk gene cluster; D) genes related to  
882 development; E) genes upregulated in response to phosphate depletion; F) genes involved in  
883 synthesis of phosphate-free polymers; G) Act gene cluster; H) Red gene cluster

884 **Figure S3: Log-transformed expression levels of genes related to nitrogen metabolism.** The  
885 glutamate import (SCO5774-5777), the glutamate sensing system *gluR-gluK* (SCO5778 and  
886 SCO57779), *glnR* (SCO4159) and *glnA* (SCO2198) are downregulated subsequent to phosphate  
887 depletion. We also observe that the first time point in M145 is very different from all other  
888 samples.

889 **Figure S4: Clustered heatmaps of Z-score based on CO<sub>2</sub>-normalized sum of fluxes of all**  
890 **pathways standardized within each pathway and separated into different subsystems /**  
891 **parts of the metabolism.** A) Central carbon metabolism. B) Amino acid metabolism. C)  
892 Metabolism of vitamins and cofactors. D) Pathways of Biosynthetic gene clusters. E) Lipid  
893 metabolism. F) Oxidative stress. G) Degradation of toxic compounds. H) All other pathways.  
894 For all panels only pathway with a minimum flux of  $1e-8$  mmol (g DW)<sup>-1</sup> h<sup>-1</sup> were included.

895 **Figure S5: RNA-seq, proteome and flux prediction of specific gene clusters and reactions.** A)  
896 EcSco-GEM predicts that the flux through citrate synthase (CS) and isocitrate dehydrogenase  
897 (ICDHyr) increases at later time points in M145, effectively increasing the shuttling of acetyl-  
898 CoA into the TCA cycle. B) Log<sub>2</sub> normalized expression data of genes involved in oxidative  
899 phosphorylation indicate an increasing expression at later time points, while overall  
900 expression in M1152 is higher than in M145. C-H) Comparison of log<sub>2</sub> normalized expression

901 data as calculated with  $(\log_2 M145) - \log_2(M1152)$ , where positive values indicate upregulation  
902 in M145 relative to M1152, and vice versa for negative values. C) Increased expression of  
903 genes of the *afsR* regulon in M145, while no significant difference in expression is observed  
904 for (D) *scbR* regulon; (E) *adpA* regulon; (F) *argR* regulon; (G) genes induced by ppGPP; and (H)  
905 genes repressed by ppGpp.

906 **Figure S6: Analysis of transcriptome data of genes.** A) Unsupervised clustering (k-means) of  
907 significantly changed genes into 7 clusters: the first three (clusters 1-3) are upregulated in  
908 M1152, while the last four (clusters 4-7) are upregulated from the beginning or at later time  
909 points in M145. B-D) Comparison of  $\log_2$  normalized expression data as calculated with  $(\log_2$   
910  $M145) - \log_2(M1152)$ , where positive values indicate upregulation in M145 relative to M1152,  
911 and vice versa for negative values. B) Genes in the SoxR regulon are reducing expression in  
912 M1152 at later time points. C) Almost all genes in the ATP-synthase cluster are up-regulated  
913 in M1152 after the first time point. D) Also, the transcription of ribosomal protein genes after  
914 the metabolic switch is increased in M1152 compared to M145. E) Batch cultivation of *S.*  
915 *coelicolor* M1146. Error bars are standard deviations of three biological replicates. CDW, Cell  
916 Dry Weight; CO<sub>2</sub> volume corrected respiration; PO<sub>4</sub>, phosphate.

917 **Figure S7: Gene Ontology enrichment analysis of the 7 clusters identified in the 499**  
918 **differentially expressed genes, categorized by function into four clustered heatmaps.**

919 Each heatmap shows the p-value for the enrichment of each GO-process. A) Genes related to  
920 reactive oxygen species, the ribosome or development process and cell wall formation. B)  
921 Oxireductase and iron / metal ion homeostasis. C) Regulation, biosynthesis and metabolism  
922 related to RNA and DNA. D) All other GO-annotations. E) This color palette is the legend for  
923 the column colors on top of each heatmap which displays which of the seven clusters each

924 gene belongs to. The red palette covers cluster 1-3 (upregulated in M1152), while the blue  
925 palette covers cluster 4-7 (upregulated in M145). Note that no GO-processes were enriched  
926 for the genes in cluster 2.

927 **Figure S8: Comparison of normalization methods of randomly sampled fluxes.** Heatmap  
928 showing mean flux values normalized by A) total carbon uptake from glucose and glutamate,  
929 B) CO<sub>2</sub> production, C) sum of all fluxes and D) growth rate. Because the mean flux values in  
930 these reactions are different by several orders of magnitude, we display the data as  
931 standardized values (for each reaction).

932

933 Other Supplemental material

934 **Supplemental Information:** The Memote report of Sco-GEM, the protocols for Sco-GEM and  
935 EcSco-GEM development and a detailed description of estimation of rates from batch  
936 fermentation data.

937 **Data Set S1**

938 **Tab 1:** Detailed overview of the script performing the reconstruction of Sco-GEM.

939 **Tab 2:** Comparison of the new biomass reaction in Sco-GEM with the biomass reaction in  
940 iAA1259.

941 **Tab 3:** Reversibility prior update, calculated change in Gibbs free energy and standard  
942 deviation of the calculated change in Gibbs free energy of 770 reactions in Sco-GEM.

943 **Tab 4:** Overview of all transport reactions added or curated during the process of Sco-GEM  
944 model development, and the metabolites added along with the new transport reactions.

945 **Tab 5:** Genes present in the 7 clusters identified with K-Means clustering of the  
946 differentially expressed genes.

947 **Tab 6:** Sco4 ID, name and Sco-GEM ID of the reactions added from Sco4 to Sco-GEM.

948 **Tab 7:** Sco4 ID, name and Sco-GEM ID of the metabolites added from Sco4 to Sco-GEM

949 **Tab 8:** Reaction ID, name and gene annotation of reactions added from iAA1259 to Sco-  
950 GEM.

951 **Tab 9:** List of reactions modified according to iAA1259.

952 **Tab 10:** Metabolite ID and name of metabolites added from Sco4 to Sco-GEM.

953 **Tab 11:** List of SBO terms used in Sco-GEM

954 **Tab 12:** Single, pair and triplets of reactions which reduced model accuracy, in total 56  
955 different reactions. The reversibility of these reactions was not changed according to the  
956 predicted change in Gibbs free energy.

957 **Tab 13:** Normalized proteome data for M145 and M1152.

958 **Tab 14:** Normalized RNA-seq data for all six fermenters. M145 is cultivated in F516-F518,  
959 while M1152 is cultivated in F519, F521, F522. Re-index IDs corresponds to sampling time  
960 point (1-9) and strain.

961 **Tab 15:** List of genes within each cluster known to be associated with the metabolic switch.

962

963



## 964   References

- 965   1.   Hopwood, David A. 2007. *Streptomyces in nature and medicine: the antibiotic makers*.  
966       Oxford University Press, USA.
- 967   2.   Hahn J-S, Oh S-Y, Roe J-H. 2002. Role of OxyR as a Peroxide-Sensing Positive Regulator  
968       in *Streptomyces coelicolor* A3(2). *Journal of Bacteriology* 184:5214–5222.
- 969   3.   Hutchings MI, Hoskisson PA, Chandra G, Buttner MJ. 2004. Sensing and responding to  
970       diverse extracellular signals? Analysis of the sensor kinases and response regulators of  
971       *Streptomyces coelicolor* A3(2). *Microbiology*, 150:2795–2806.
- 972   4.   Nothaft H, Rigali S, Boomsma B, Swiatek M, McDowall KJ, van Wezel GP, Titgemeyer F.  
973       2010. The permease gene *nagE2* is the key to N-acetylglucosamine sensing and  
974       utilization in *Streptomyces coelicolor* and is subject to multi-level control. *Molecular*  
975       *Microbiology* 75:1133–1144.
- 976   5.   Rigali S, Titgemeyer F, Barends S, Mulder S, Thomae AW, Hopwood DA, van Wezel GP.  
977       2008. Feast or famine: the global regulator DasR links nutrient stress to antibiotic  
978       production by *Streptomyces*. *EMBO reports* 9:670–675.
- 979   6.   Sola-Landa A, Rodríguez-García A, Franco-Domínguez E, Martín JF. 2005. Binding of  
980       PhoP to promoters of phosphate-regulated genes in *Streptomyces coelicolor*:  
981       identification of PHO boxes. *Molecular Microbiology* 56:1373–1385.
- 982   7.   Chandra G, Chater KF. 2014. Developmental biology of *Streptomyces* from the  
983       perspective of 100 actinobacterial genome sequences. *FEMS Microbiol Rev* 38:345–  
984       379.

985 8. Nieselt K, Battke F, Herbig A, Bruheim P, Wentzel A, Jakobsen ØM, Sletta H, Alam MT,  
986 Merlo ME, Moore J, Omara WA, Morrissey ER, Juarez-Hermosillo MA, Rodríguez-García  
987 A, Nentwich M, Thomas L, Iqbal M, Legaie R, Gaze WH, Challis GL, Jansen RC, Dijkhuizen  
988 L, Rand DA, Wild DL, Bonin M, Reuther J, Wohlleben W, Smith MC, Burroughs NJ, Martín  
989 JF, Hodgson DA, Takano E, Breitling R, Ellingsen TE, Wellington EM, Kolter R, Siegele D,  
990 Tormo A, Hesketh A, Bucca G, Laing E, Flett F, Hotchkiss G, Smith C, Chater K, Hesketh  
991 A, Chen W, Ryding J, Chang S, Bibb M, Huang J, Lih C, Pan K, Cohen S, Lian W, Jayapal K,  
992 Charaniya S, Mehra S, Glod F, Kyung Y, Sherman D, Hu W, Strauch E, Takano E, Baylis H,  
993 Bibb M, DeRisi J, Iyer V, Brown P, Reuther J, Wohlleben W, Fink D, Weissschuh N,  
994 Reuther J, Wohlleben W, Engels A, Tiffert Y, Supra P, Wurm R, Wohlleben W, Wagner R,  
995 Reuther J, Pawlik K, Kotowska M, Chater K, Kuczek K, Takano E, Takano E, Chakraborty  
996 R, Nihira T, Yamada Y, Bibb M, Takano E, Kinoshita H, Mersinias V, Bucca G, Hotchkiss  
997 G, Nihira T, Smith C, Bibb M, Wohlleben W, Chater K, Kotowska M, Pawlik K, Smulczyk-  
998 Krawczynszyn A, Bartosz-Bechowski H, Kuczek K, Claessen D, Rink R, Jong W de, Siebring  
999 J, Vreugd P de, Boersma F, Dijkhuizen L, Wosten H, Bibb M, Molle V, Buttner M, Ryding  
1000 N, Kelemen G, Whatling C, Flardh K, Buttner M, Chater K, Ohnishi Y, Seo J, Horinouchi  
1001 S, Sola-Landa A, Moura R, Martín J, Sola-Landa A, Rodríguez-García A, Franco-  
1002 Domínguez E, Martín J, Rodríguez-García A, Barreiro C, Santos-Beneit F, Sola-Landa A,  
1003 Martín J, Sola-Landa A, Rodríguez-García A, Apel A, Martín J, Feitelson J, Malpartida F,  
1004 Hopwood D, Hallam S, Malpartida F, Hopwood D, Takano E, Gramajo H, Strauch E,  
1005 Andres N, White J, Bibb M, Kieser T, Bibb M, Buttner M, Chater K, Hopwood D, Bystrykh  
1006 L, Fernandez-Moreno M, Herrema J, Malpartida F, Hopwood D, Dijkhuizen L, Irizarry R,  
1007 Bolstad B, Collin F, Cope L, Hobbs B, Speed T, Ihaka R, Gentleman R, Dietzsch J,

- 1008 Gehlenborg N, Nieselt K. 2010. The dynamic architecture of the metabolic switch in  
1009 *Streptomyces coelicolor*. *BMC Genomics* 11:10.
- 1010 9. Thomas L, Hodgson DA, Wentzel A, Nieselt K, Ellingsen TE, Moore J, Morrissey ER, Legaie  
1011 R, STREAM Consortium TS, Wohlleben W, Rodríguez-García A, Martín JF, Burroughs NJ,  
1012 Wellington EMH, Smith MCM. 2012. Metabolic switches and adaptations deduced from  
1013 the proteomes of *Streptomyces coelicolor* wild type and *phoP* mutant grown in batch  
1014 culture. *Molecular & cellular proteomics : MCP* 11:M111.013797.
- 1015 10. Bentley SD, Chater KF, Cerdeño-Tárraga A-MA-M, Challis GL, Thomson NR, James KD,  
1016 Harris DE, Quail MA, Kieser H, Harper D, Bateman A, Brown S, Chandra G, Chen CW,  
1017 Collins M, Cronin A, Fraser A, Goble A, Hidalgo J, Hornsby T, Howarth S, Huang C-HC-H,  
1018 Kieser T, Larke L, Murphy L, Oliver K, O'Neil S, Rabinowitsch E, Rajandream MM-A,  
1019 Rutherford K, Rutter S, Seeger K, Saunders D, Sharp S, Squares R, Squares S, Taylor K,  
1020 Warren T, Wietzorrek A, Woodward J, Barrell BG, Parkhill J, Hopwood DA. 2002.  
1021 Complete genome sequence of the model actinomycete *Streptomyces coelicolor* A3(2).  
1022 *Nature* 417:141–147.
- 1023 11. Gomez-Escribano JP, Song L, Fox DJ, Yeo V, Bibb MJ, Challis GL. 2012. Structure and  
1024 biosynthesis of the unusual polyketide alkaloid coelimycin P1, a metabolic product of  
1025 the *cpk* gene cluster of *Streptomyces coelicolor* M145. *Chem Sci* 3:2716–2720.
- 1026 12. Castro JF, Razmilic V, Gomez-Escribano JP, Andrews B, Asenjo JA, Bibb MJ. 2015.  
1027 Identification and Heterologous Expression of the Chaxamycin Biosynthesis Gene  
1028 Cluster from *Streptomyces leeuwenhoekii*. *Appl Environ Microbiol* 81:5820–5831.

- 1029 13. Gomez-Escribano JP, Bibb MJ. 2011. Engineering *Streptomyces coelicolor* for  
1030 heterologous expression of secondary metabolite gene clusters. *Microbial*  
1031 *Biotechnology* 4:207–215.
- 1032 14. Gomez-Escribano JP, Bibb MJ. 2014. Heterologous expression of natural product  
1033 biosynthetic gene clusters in *Streptomyces coelicolor*: from genome mining to  
1034 manipulation of biosynthetic pathways. *Journal of Industrial Microbiology &*  
1035 *Biotechnology* 41:425–431.
- 1036 15. Kumelj T, Sulheim S, Wentzel A, Almaas E. 2018. Predicting Strain Engineering Strategies  
1037 Using iKS1317: A Genome-Scale Metabolic Model of *Streptomyces coelicolor*.  
1038 *Biotechnology Journal* 0:1800180.
- 1039 16. Thanapipatsiri A, Claesen J, Gomez-Escribano J-P, Bibb M, Thamchaipenet A. 2015. A  
1040 *Streptomyces coelicolor* host for the heterologous expression of Type III polyketide  
1041 synthase genes. *Microb Cell Fact* 14.
- 1042 17. Yin J, Hoffmann M, Bian X, Tu Q, Yan F, Xia L, Ding X, Francis Stewart A, Müller R, Fu J,  
1043 Zhang Y. 2015. Direct cloning and heterologous expression of the salinomycin  
1044 biosynthetic gene cluster from *Streptomyces albus* DSM41398 in *Streptomyces*  
1045 *coelicolor* A3(2). *Scientific Reports* 5:15081.
- 1046 18. Nepal KK, Wang G. 2019. Streptomycetes: Surrogate hosts for the genetic manipulation  
1047 of biosynthetic gene clusters and production of natural products. *Biotechnology*  
1048 *Advances* 37:1–20.

- 1049 19. Rutledge PJ, Challis GL. 2015. Discovery of microbial natural products by activation of  
1050 silent biosynthetic gene clusters. *Nature Reviews Microbiology* 13:509–523.
- 1051 20. Wentzel A, Bruheim P, Øverby A, Jakobsen ØM, Sletta H, Omara WAM, Hodgson DA,  
1052 Ellingsen TE, Hopwood D, Bentley S, Chater K, Cerdeno-Tarraga A, Challis G, Thomson  
1053 N, James K, Harris D, Quail M, Kieser H, Harper D, Klieneberger-Nobel E, Chater K,  
1054 Hopwood D, Chater K, Bibb M, Lakey J, Lea E, Rudd B, Wright H, Hopwood D, Wright L,  
1055 Hopwood D, Feitelson J, Hopwood D, Bibb M, Rokem J, Lantz S, Eliasson A, Nielsen J,  
1056 Song S, Jeong Y, Kim P, Chun G, Rosa J, Neto AB, Hokka C, Badino A, Kieser T, Bibb M,  
1057 Buttner M, Chater K, Hopwood D, Hayes A, Hobbs G, Smith C, Oliver S, Butler P, Evans  
1058 C, Herbet D, Tempest D, Takano E, Gramajo H, Strauch E, Andres N, White J, Bibb M,  
1059 Bruheim P, Sletta H, Bibb M, White J, Levine D, Hodgson D, Nieselt K, Battke F, Herbig  
1060 A, Bruheim P, Wentzel A, Jakobsen O, Sletta H, Alam M, Merlo M, Moore J, Alam M,  
1061 Merlo M, Hodgson D, Wellington E, Takano E, Breitling R, Battke F, Symons S, Nieselt K,  
1062 Battke F, Herbig A, Wentzel A, Jakobsen O, Bonin M, Hodgson D, Wohlleben W, Ellingsen  
1063 T, Nieselt K, Thomas L, Hodgson D, Wentzel A, Nieselt K, Ellingsen T, Moore J, Morrissey  
1064 E, Legaie R, Wohlleben W, Rodriguez-Garcia A, Wentzel A, Sletta H, Consortium S,  
1065 Ellingsen T, Bruheim P, Waldvogel E, Herbig A, Battke F, Amin R, Nentwich M, Nieselt K,  
1066 Ellingsen T, Wentzel A, Hodgson D, Wohlleben W, Mast Y, Claessen D, Rink R, Jong W  
1067 de, Siebring J, Vreugd P de, Boersma F, Dijkhuizen L, Wosten H, Bystrykh L, Fernandez-  
1068 Moreno M, Herrema J, Malpartida F, Hopwood D, Dijkhuizen L, Villas-Boas S, Delicado  
1069 D, Akesson M, Nielsen J, Christensen B, Nielsen J, Strauch E, Takano E, Baylis H, Bibb M,  
1070 Martin J, Martin J, Demain A, Coisne S, Béchet M, Blondeau R, Gesheva V, Ivanova V,  
1071 Gesheva R, Nakamura T, Yoshimoto A, Rollins M, Jensen S, Westlake D, Gorst-Allman C,

- 1072 Rudd B, Chang C-J, Floss H, Wasserman H, Shaw C, Sykes R, Cushley R, Bruheim P, Butler  
1073 M, Ellingsen T, Jonsbu E, Christensen B, Nielsen J, Gunnarsson N, Bruheim P, Nielsen J,  
1074 Rodriguez-Garcia A, Sola-Landa A, Apel K, Santos-Beneit F, Martin J, Santos-Beneit F,  
1075 Rodriguez-Garcia A, Sola-Landa A, Martin J, Lambert R, Stratford M, Surowitz K, Pfister  
1076 R. 2012. Optimized submerged batch fermentation strategy for systems scale studies of  
1077 metabolic switching in *Streptomyces coelicolor* A3(2). *BMC Systems Biology* 6:59.
- 1078 21. Wentzel A, Sletta H, Consortium S, Ellingsen TE, Bruheim P. 2012. Intracellular  
1079 Metabolite Pool Changes in Response to Nutrient Depletion Induced Metabolic  
1080 Switching in *Streptomyces coelicolor*. *Metabolites* 2:178–194.
- 1081 22. Hu H, Zhang Q, Ochi K. 2002. Activation of Antibiotic Biosynthesis by Specified  
1082 Mutations in the *rpoB* Gene (Encoding the RNA Polymerase  $\beta$  Subunit) of *Streptomyces*  
1083 *lividans*. *Journal of Bacteriology* 184:3984–3991.
- 1084 23. Braesel J, Tran TA, Eustáquio AS. 2019. Heterologous expression of the diazaquinomycin  
1085 biosynthetic gene cluster. *J Ind Microbiol Biotechnol*.
- 1086 24. Kepplinger B, Morton-Laing S, Seistrup KH, Marrs ECL, Hopkins AP, Perry JD, Strahl H,  
1087 Hall MJ, Errington J, Allenby NEE. 2018. Mode of Action and Heterologous Expression of  
1088 the Natural Product Antibiotic Vancoresmycin. *ACS Chem Biol* 13:207–214.
- 1089 25. Li T, Du Y, Cui Q, Zhang J, Zhu W, Hong K, Li W. 2013. Cloning, Characterization and  
1090 Heterologous Expression of the Indolocarbazole Biosynthetic Gene Cluster from  
1091 Marine-Derived *Streptomyces sanyensis* FMA. *Marine Drugs* 11:466–488.

- 1092 26. Battke F, Symons S, Nieselt K. 2010. Mayday--integrative analytics for expression data.  
1093 BMC Bioinformatics 11:121.
- 1094 27. Jäger G, Battke F, Nieselt K. 2011. TIALA — Time series alignment analysis, p. 55–61. *In*  
1095 2011 IEEE Symposium on Biological Data Visualization (BioVis).
- 1096 28. Liao Y, Smyth GK, Shi W. 2014. featureCounts: an efficient general purpose program for  
1097 assigning sequence reads to genomic features. Bioinformatics 30:923–930.
- 1098 29. Love MI, Huber W, Anders S. 2014. Moderated estimation of fold change and dispersion  
1099 for RNA-seq data with DESeq2. Genome Biol 15:550.
- 1100 30. Mi H, Muruganujan A, Ebert D, Huang X, Thomas PD. 2019. PANTHER version 14: more  
1101 genomes, a new PANTHER GO-slim and improvements in enrichment analysis tools.  
1102 Nucleic Acids Res 47:D419–D426.
- 1103 31. Sánchez BJ, Zhang C, Nilsson A, Lahtvee P-J, Kerkhoven EJ, Nielsen J. 2017. Improving  
1104 the phenotype predictions of a yeast genome-scale metabolic model by incorporating  
1105 enzymatic constraints. Molecular Systems Biology 13:935.
- 1106 32. Robinson JL, Nielsen J. 2016. Integrative analysis of human omics data using  
1107 biomolecular networks. Mol Biosyst 12:2953–2964.
- 1108 33. Borodina I, Krabben P, Nielsen J. 2005. Genome-scale analysis of *Streptomyces*  
1109 *coelicolor* A3(2) metabolism. Genome research 15:820–9.
- 1110 34. Alam MT, Merlo ME, (stream) TSC, Hodgson DA, Wellington EM, Takano E, Breitling R.  
1111 2010. Metabolic modeling and analysis of the metabolic switch in *Streptomyces*  
1112 *coelicolor*. BMC Genomics 11:202.

- 1113 35. Amara A, Takano E, Breitling R. 2018. Development and validation of an updated  
1114 computational model of *Streptomyces coelicolor* primary and secondary metabolism.  
1115 *BMC Genomics* 19:519.
- 1116 36. Kim MW, Sang Yi J, Kim J-NJJ-NNJ, Kim J-NJJ-NNJ, Kim MW, Kim B-GG. 2014.  
1117 Reconstruction of a high-quality metabolic model enables the identification of gene  
1118 overexpression targets for enhanced antibiotic production in *Streptomyces coelicolor*  
1119 A3(2). *Biotechnology Journal* 9:1185–1194.
- 1120 37. Wang H, Marcišauskas S, Sánchez BJ, Domenzain I, Hermansson D, Agren R, Nielsen J,  
1121 Kerkhoven EJ. 2018. RAVEN 2.0: A versatile toolbox for metabolic network  
1122 reconstruction and a case study on *Streptomyces coelicolor*. *PLOS Computational*  
1123 *Biology* 14:e1006541.
- 1124 38. Mohite OS, Weber T, Kim HU, Lee SY. 2019. Genome-Scale Metabolic Reconstruction of  
1125 *Actinomycetes* for Antibiotics Production. *Biotechnology Journal* 14:1800377.
- 1126 39. Toro L, Pinilla L, Avignone-Rossa C, Ríos-Esteba R. 2018. An enhanced genome-scale  
1127 metabolic reconstruction of *Streptomyces clavuligerus* identifies novel strain  
1128 improvement strategies. *Bioprocess Biosyst Eng* 41:657–669.
- 1129 40. Licona-Cassani C, Marcellin E, Quek L-E, Jacob S, Nielsen LK. 2012. Reconstruction of the  
1130 *Saccharopolyspora erythraea* genome-scale model and its use for enhancing  
1131 erythromycin production. *Antonie van Leeuwenhoek* 102:493–502.
- 1132 41. Valverde JR, Gullón S, Mellado RP. 2018. Modelling the metabolism of protein secretion  
1133 through the Tat route in *Streptomyces lividans*. *BMC Microbiology* 18:59.



- 1134 42. Lieven C, Beber ME, Olivier BG, Bergmann FT, Ataman M, Babaei P, Bartell JA, Blank LM,  
1135 Chauhan S, Correia K, Diener C, Dräger A, Ebert BE, Edirisinghe JN, Faria JP, Feist A,  
1136 Fengos G, Fleming RMT, Garcia-Jimenez B, Hatzimanikatis V, Helvoirt W van, Henry C,  
1137 Hermjakob H, Herrgard MJ, Kim HU, King Z, Koehorst JJ, Klamt S, Klipp E, Lakshmanan  
1138 M, Noverre NL, Lee D-Y, Lee SY, Lee S, Lewis NE, Ma H, Machado D, Mahadevan R, Maia  
1139 P, Mardinoglu A, Medlock GL, Monk J, Nielsen J, Nielsen LK, Nogales J, Nookaew I,  
1140 Resendis O, Palsson B, Papin JA, Patil KR, Poolman M, Price ND, Richelle A, Rocha I,  
1141 Sanchez B, Schaap P, Sheriff RSM, Shoaie S, Sonnenschein N, Teusink B, Vilaca P, Vik JO,  
1142 Wodke JA, Xavier JC, Yuan Q, Zakhartsev M, Zhang C. 2018. Memote: A community-  
1143 driven effort towards a standardized genome-scale metabolic model test suite. bioRxiv  
1144 350991.
- 1145 43. Thiele I, Swainston N, Fleming RMT, Hoppe A, Sahoo S, Aurich MK, Haraldsdottir H, Mo  
1146 ML, Rolfsson O, Stobbe MD, Thorleifsson SG, Agren R, Bölling C, Bordel S, Chavali AK,  
1147 Dobson P, Dunn WB, Endler L, Hala D, Hucka M, Hull D, Jameson D, Jamshidi N, Jonsson  
1148 JJ, Juty N, Keating S, Nookaew I, Le Novère N, Malys N, Mazein A, Papin JA, Price ND,  
1149 Selkov E, Sigurdsson MI, Simeonidis E, Sonnenschein N, Smallbone K, Sorokin A, van  
1150 Beek JHGM, Weichart D, Goryanin I, Nielsen J, Westerhoff HV, Kell DB, Mendes P,  
1151 Palsson BØ. 2013. A community-driven global reconstruction of human metabolism.  
1152 Nat Biotechnol 31.
- 1153 44. Aung HW, Henry SA, Walker LP. 2013. Revising the Representation of Fatty Acid,  
1154 Glycerolipid, and Glycerophospholipid Metabolism in the Consensus Model of Yeast  
1155 Metabolism. Industrial Biotechnology 9:215–228.

- 1156 45. Dobson PD, Smallbone K, Jameson D, Simeonidis E, Lanthaler K, Pir P, Lu C, Swainston  
1157 N, Dunn WB, Fisher P, Hull D, Brown M, Oshota O, Stanford NJ, Kell DB, King RD, Oliver  
1158 SG, Stevens RD, Mendes P. 2010. Further developments towards a genome-scale  
1159 metabolic model of yeast. *BMC Syst Biol* 4:145.
- 1160 46. Heavner BD, Smallbone K, Barker B, Mendes P, Walker LP. 2012. Yeast 5 – an expanded  
1161 reconstruction of the *Saccharomyces cerevisiae* metabolic network. *BMC Systems*  
1162 *Biology* 6:55.
- 1163 47. Heavner BD, Smallbone K, Price ND, Walker LP. 2013. Version 6 of the consensus yeast  
1164 metabolic network refines biochemical coverage and improves model performance.  
1165 *Database (Oxford)* 2013:bat059.
- 1166 48. Herrgård MJ, Swainston N, Dobson P, Dunn WB, Arga KY, Arvas M, Blüthgen N, Borger  
1167 S, Costenoble R, Heinemann M, Hucka M, Le Novère N, Li P, Liebermeister W, Mo ML,  
1168 Oliveira AP, Petranovic D, Pettifer S, Simeonidis E, Smallbone K, Spasić I, Weichart D,  
1169 Brent R, Broomhead DS, Westerhoff HV, Kirdar B, Penttilä M, Klipp E, Palsson BØ, Sauer  
1170 U, Oliver SG, Mendes P, Nielsen J, Kell DB. 2008. A consensus yeast metabolic network  
1171 reconstruction obtained from a community approach to systems biology. *Nat*  
1172 *Biotechnol* 26:1155–1160.
- 1173 49. Lu H, Li F, Sánchez BJ, Zhu Z, Li G, Domenzain I, Marcišauskas S, Anton PM, Lappa D,  
1174 Lieven C, Beber ME, Sonnenschein N, Kerkhoven EJ, Nielsen J. 2019. A consensus *S.*  
1175 *cerevisiae* metabolic model Yeast8 and its ecosystem for comprehensively probing  
1176 cellular metabolism. *Nat Commun* 10:1–13.

- 1177 50. Hefzi H, Ang KS, Hanscho M, Bordbar A, Ruckerbauer D, Lakshmanan M, Orellana CA,  
1178 Baycin-Hizal D, Huang Y, Ley D, Martinez VS, Kyriakopoulos S, Jiménez NE, Zielinski DC,  
1179 Quek L-E, Wulff T, Arnsdorf J, Li S, Lee JS, Paglia G, Loira N, Spahn PN, Pedersen LE,  
1180 Gutierrez JM, King ZA, Lund AM, Nagarajan H, Thomas A, Abdel-Haleem AM, Zanghellini  
1181 J, Kildegaard HF, Voldborg BG, Gerdtzen ZP, Betenbaugh MJ, Palsson BO, Andersen MR,  
1182 Nielsen LK, Borth N, Lee D-Y, Lewis NE. 2016. A Consensus Genome-scale  
1183 Reconstruction of Chinese Hamster Ovary Cell Metabolism. *Cell Systems* 3:434-443.e8.
- 1184 51. Kanehisa M. 2000. KEGG: Kyoto Encyclopedia of Genes and Genomes. *Nucleic Acids*  
1185 *Research* 28:27–30.
- 1186 52. Kanehisa M, Sato Y, Furumichi M, Morishima K, Tanabe M. 2019. New approach for  
1187 understanding genome variations in KEGG. *Nucleic Acids Research* 47:D590–D595.
- 1188 53. Karp PD, Billington R, Caspi R, Fulcher CA, Latendresse M, Kothari A, Keseler IM,  
1189 Krummenacker M, Midford PE, Ong Q, Ong WK, Paley SM, Subhraveti P. 2017. The  
1190 BioCyc collection of microbial genomes and metabolic pathways. *Brief Bioinform.*
- 1191 54. Hastings J, Owen G, Dekker A, Ennis M, Kale N, Muthukrishnan V, Turner S, Swainston  
1192 N, Mendes P, Steinbeck C. 2016. ChEBI in 2016: Improved services and an expanding  
1193 collection of metabolites. *Nucleic Acids Res* 44:D1214–D1219.
- 1194 55. Moretti S, Martin O, Van Du Tran T, Bridge A, Morgat A, Pagni M. 2016.  
1195 MetaNetX/MNXref – reconciliation of metabolites and biochemical reactions to bring  
1196 together genome-scale metabolic networks. *Nucleic Acids Res* 44:D523–D526.

- 1197 56. King ZA, Lu J, Dräger A, Miller P, Federowicz S, Lerman JA, Ebrahim A, Pálsson BO, Lewis  
1198 NE, J. H. 2016. BiGG Models: A platform for integrating, standardizing and sharing  
1199 genome-scale models. *Nucleic Acids Research* 44:D515–D522.
- 1200 57. The UniProt Consortium. 2019. UniProt: a worldwide hub of protein knowledge. *Nucleic  
1201 Acids Res* 47:D506–D515.
- 1202 58. Thiele I, Pálsson BØ. 2010. A protocol for generating a high-quality genome-scale  
1203 metabolic reconstruction. *Nature protocols* 5:93–121.
- 1204 59. Flamholz A, Noor E, Bar-Even A, Milo R. 2012. eQuilibrator—the biochemical  
1205 thermodynamics calculator. *Nucleic Acids Res* 40:D770–D775.
- 1206 60. Chakrabarty AM. 1998. Nucleoside diphosphate kinase: role in bacterial growth,  
1207 virulence, cell signalling and polysaccharide synthesis. *Molecular Microbiology* 28:875–  
1208 882.
- 1209 61. Yoshida M, Muneyuki E, Hisabori T. 2001. ATP synthase — a marvellous rotary engine  
1210 of the cell. *Nat Rev Mol Cell Biol* 2:669–677.
- 1211 62. Getsin I, Nalbandian GH, Yee DC, Vastermark A, Papparoditis PC, Reddy VS, Saier MH.  
1212 2013. Comparative genomics of transport proteins in developmental bacteria:  
1213 *Myxococcus xanthus* and *Streptomyces coelicolor*. *BMC Microbiol* 13:279.
- 1214 63. Smirnov A, Esnault C, Prigent M, Holland IB, Virolle M-J. 2015. Phosphate Homeostasis  
1215 in Conditions of Phosphate Proficiency and Limitation in the Wild Type and the *phoP*  
1216 Mutant of *Streptomyces lividans*. *PLoS One* 10.

- 1217 64. Orth JD, Thiele I, Palsson BØO. 2010. What is flux balance analysis? Nat Biotech 28:245–  
1218 248.
- 1219 65. Bordel S, Agren R, Nielsen J. 2010. Sampling the Solution Space in Genome-Scale  
1220 Metabolic Networks Reveals Transcriptional Regulation in Key Enzymes. PLOS  
1221 Computational Biology 6:e1000859.
- 1222 66. Martín JF, Santos-Beneit F, Rodríguez-García A, Sola-Landa A, Smith MCM, Ellingsen TE,  
1223 Nieselt K, Burroughs NJ, Wellington EMH. 2012. Transcriptomic studies of phosphate  
1224 control of primary and secondary metabolism in *Streptomyces coelicolor*. Appl  
1225 Microbiol Biotechnol 95:61–75.
- 1226 67. Martín-Martín S, Rodríguez-García A, Santos-Beneit F, Franco-Domínguez E, Sola-Landa  
1227 A, Martín JF. 2018. Self-control of the PHO regulon: the PhoP-dependent protein PhoU  
1228 controls negatively expression of genes of PHO regulon in *Streptomyces coelicolor*. The  
1229 Journal of Antibiotics 71:113–122.
- 1230 68. Sola-Landa A, Moura RS, Martín JF. 2003. The two-component PhoR-PhoP system  
1231 controls both primary metabolism and secondary metabolite biosynthesis in  
1232 *Streptomyces lividans*. Proc Natl Acad Sci U S A 100:6133–6138.
- 1233 69. Martín JF, Rodríguez-García A, Liras P. 2017. The master regulator PhoP coordinates  
1234 phosphate and nitrogen metabolism, respiration, cell differentiation and antibiotic  
1235 biosynthesis: comparison in *Streptomyces coelicolor* and *Streptomyces avermitilis*. The  
1236 Journal of Antibiotics 70:534–541.

- 1237 70. Li L, Jiang W, Lu Y. 2017. A Novel Two-Component System, GluR-GluK, Involved in  
1238 Glutamate Sensing and Uptake in *Streptomyces coelicolor*. *Journal of Bacteriology* 199.
- 1239 71. Fink D, Weißschuh N, Reuther J, Wohlleben W, Engels A. 2002. Two transcriptional  
1240 regulators GlnR and GlnRII are involved in regulation of nitrogen metabolism in  
1241 *Streptomyces coelicolor* A3(2). *Molecular Microbiology* 46:331–347.
- 1242 72. Martín JF. 2004. Phosphate Control of the Biosynthesis of Antibiotics and Other  
1243 Secondary Metabolites Is Mediated by the PhoR-PhoP System: an Unfinished Story.  
1244 *Journal of Bacteriology* 186:5197–5201.
- 1245 73. Stirrett K, Denoya C, Westpheling J. 2009. Branched-chain amino acid catabolism  
1246 provides precursors for the Type II polyketide antibiotic, actinorhodin, via pathways  
1247 that are nutrient dependent. *J Ind Microbiol Biotechnol* 36:129–137.
- 1248 74. Esnault C, Dulermo T, Smirnov A, Askora A, David M, Deniset-Besseau A, Holland I-B,  
1249 Virolle M-J. 2017. Strong antibiotic production is correlated with highly active oxidative  
1250 metabolism in *Streptomyces coelicolor* M145. *Scientific Reports* 7:200.
- 1251 75. Borodina I, Siebring J, Zhang J, Smith CP, Keulen G van, Dijkhuizen L, Nielsen J. 2008.  
1252 Antibiotic Overproduction in *Streptomyces coelicolor* A3(2) Mediated by  
1253 Phosphofructokinase Deletion. *J Biol Chem* 283:25186–25199.
- 1254 76. Jonsbu E, Christensen B, Nielsen J. 2001. Changes of in vivo fluxes through central  
1255 metabolic pathways during the production of nystatin by *Streptomyces noursei* in batch  
1256 culture. *Appl Microbiol Biotechnol* 56:93–100.

- 1257 77. Gallo G, Renzone G, Alduina R, Stegmann E, Weber T, Lantz AE, Thykaer J, Sangiorgi F,  
1258 Scaloni A, Puglia AM. 2010. Differential proteomic analysis reveals novel links between  
1259 primary metabolism and antibiotic production in *Amycolatopsis balhimycina*.  
1260 *PROTEOMICS* 10:1336–1358.
- 1261 78. Coze F, Gilard F, Tcherkez G, Virolle M-J, Guyonvarch A. 2013. Carbon-Flux Distribution  
1262 within *Streptomyces coelicolor* Metabolism: A Comparison between the Actinorhodin-  
1263 Producing Strain M145 and Its Non-Producing Derivative M1146. *PLOS ONE* 8:e84151.
- 1264 79. Millan-Oropeza A, Henry C, Blein-Nicolas M, Aubert-Frambourg A, Moussa F, Bleton J,  
1265 Virolle M-J. 2017. Quantitative Proteomics Analysis Confirmed Oxidative Metabolism  
1266 Predominates in *Streptomyces coelicolor* versus Glycolytic Metabolism in *Streptomyces*  
1267 *lividans*. *J Proteome Res* 16:2597–2613.
- 1268 80. Ashburner M, Ball CA, Blake JA, Botstein D, Butler H, Cherry JM, Davis AP, Dolinski K,  
1269 Dwight SS, Eppig JT, Harris MA, Hill DP, Issel-Tarver L, Kasarskis A, Lewis S, Matese JC,  
1270 Richardson JE, Ringwald M, Rubin GM, Sherlock G. 2000. Gene ontology: tool for the  
1271 unification of biology. The Gene Ontology Consortium. *Nat Genet* 25:25–29.
- 1272 81. The Gene Ontology Consortium. 2019. The Gene Ontology Resource: 20 years and still  
1273 GOing strong. *Nucleic Acids Res* 47:D330–D338.
- 1274 82. Stahl W, Sies H. 2003. Antioxidant activity of carotenoids. *Molecular Aspects of*  
1275 *Medicine* 24:345–351.
- 1276 83. Latifi A, Ruiz M, Zhang C-C. 2009. Oxidative stress in cyanobacteria. *FEMS Microbiol Rev*  
1277 33:258–278.

- 1278 84. Zangar RC, Davydov DR, Verma S. 2004. Mechanisms that regulate production of  
1279 reactive oxygen species by cytochrome P450. *Toxicology and Applied Pharmacology*  
1280 199:316–331.
- 1281 85. Lamb DC, Ikeda H, Nelson DR, Ishikawa J, Skaug T, Jackson C, Omura S, Waterman MR,  
1282 Kelly SL. 2003. Cytochrome P450 complement (CYPome) of the avermectin-producer  
1283 *Streptomyces avermitilis* and comparison to that of *Streptomyces coelicolor* A3(2).  
1284 *Biochemical and Biophysical Research Communications* 307:610–619.
- 1285 86. Bednarz B, Kotowska M, Pawlik KJ. 2019. Multi-level regulation of coelimycin synthesis  
1286 in *Streptomyces coelicolor* A3(2). *Appl Microbiol Biotechnol* 103:6423–6434.
- 1287 87. Li X, Wang J, Li S, Ji J, Wang W, Yang K. 2015. ScbR- and ScbR2-mediated signal  
1288 transduction networks coordinate complex physiological responses in *Streptomyces*  
1289 *coelicolor*. *Scientific Reports* 5:14831.
- 1290 88. Lee P-C, Umeyama T, Horinouchi S. 2002. afsS is a target of AfsR, a transcriptional factor  
1291 with ATPase activity that globally controls secondary metabolism in *Streptomyces*  
1292 *coelicolor* A3(2). *Molecular Microbiology* 43:1413–1430.
- 1293 89. Horinouchi S. 2003. AfsR as an integrator of signals that are sensed by multiple  
1294 serine/threonine kinases in *Streptomyces coelicolor* A3(2). *J IND MICROBIOL*  
1295 *BIOTECHNOL* 30:462–467.
- 1296 90. Naseer N, Shapiro JA, Chander M. 2014. RNA-Seq analysis reveals a six-gene SoxR  
1297 regulon in *Streptomyces coelicolor*. *PLoS ONE* 9:e106181.



- 1298 91. Dela Cruz R, Gao Y, Penumetcha S, Sheplock R, Weng K, Chander M. 2010. Expression  
1299 of the *Streptomyces coelicolor* SoxR regulon is intimately linked with actinorhodin  
1300 production. *J Bacteriol* 192:6428–6438.
- 1301 92. Shin J-H, Singh AK, Cheon D-J, Roe J-H. 2011. Activation of the SoxR regulon in  
1302 *Streptomyces coelicolor* by the extracellular form of the pigmented antibiotic  
1303 actinorhodin. *J Bacteriol* 193:75–81.
- 1304 93. Valton J, Mathevon C, Fontecave M, Nivière V, Ballou DP. 2008. Mechanism and  
1305 regulation of the Two-component FMN-dependent monooxygenase ActVA-ActVB from  
1306 *Streptomyces coelicolor*. *J Biol Chem* 283:10287–10296.
- 1307 94. Burgos HL, O'Connor K, Sanchez-Vazquez P, Gourse RL. 2017. Roles of Transcriptional  
1308 and Translational Control Mechanisms in Regulation of Ribosomal Protein Synthesis in  
1309 *Escherichia coli*. *J Bacteriol* 199.
- 1310 95. Hesketh A, Chen WJ, Ryding J, Chang S, Bibb M. 2007. The global role of ppGpp synthesis  
1311 in morphological differentiation and antibiotic production in *Streptomyces coelicolor*  
1312 A3(2). *Genome Biol* 8:R161.
- 1313 96. Srivatsan A, Wang JD. 2008. Control of bacterial transcription, translation and  
1314 replication by (p)ppGpp. *Current Opinion in Microbiology* 11:100–105.
- 1315 97. Gaal T, Bartlett MS, Ross W, Turnbough CL, Gourse RL. 1997. Transcription Regulation  
1316 by Initiating NTP Concentration: rRNA Synthesis in Bacteria. *Science* 278:2092–2097.
- 1317 98. Chemler JA, Buchholz TJ, Geders TW, Akey DL, Rath CM, Chlipala GE, Smith JL, Sherman  
1318 DH. 2012. Biochemical and Structural Characterization of Germicidin Synthase: Analysis

- 1319 of a Type III Polyketide Synthase that Employs Acyl-ACP as a Starter Unit Donor. *J Am*  
1320 *Chem Soc* 134:7359–7366.
- 1321 99. Xu J, Tozawa Y, Lai C, Hayashi H, Ochi K. 2002. A rifampicin resistance mutation in the  
1322 *rpoB* gene confers ppGpp-independent antibiotic production in *Streptomyces coelicolor*  
1323 A3(2). *Mol Gen Genomics* 268:179–189.
- 1324 100. Craney A, Ozimok C, Pimentel-Elardo SM, Capretta A, Nodwell JR. 2012. Chemical  
1325 Perturbation of Secondary Metabolism Demonstrates Important Links to Primary  
1326 Metabolism. *Chemistry & Biology* 19:1020–1027.
- 1327 101. Courtot M, Juty N, Knüpfer C, Waltemath D, Zhukova A, Dräger A, Dumontier M, Finney  
1328 A, Golebiewski M, Hastings J, Hoops S, Keating S, Kell DB, Kerrien S, Lawson J, Lister A,  
1329 Lu J, Machne R, Mendes P, Pocock M, Rodriguez N, Villeger A, Wilkinson DJ,  
1330 Wimalaratne S, Laibe C, Hucka M, Le Novère N. 2011. Controlled vocabularies and  
1331 semantics in systems biology. *Mol Syst Biol* 7:543.
- 1332 102. Noor E, Haraldsdóttir HS, Milo R, Fleming RMT. 2013. Consistent Estimation of Gibbs  
1333 Energy Using Component Contributions. *PLOS Computational Biology* 9:e1003098.
- 1334 103. Bar-Even A, Flamholz A, Noor E, Milo R. 2012. Thermodynamic constraints shape the  
1335 structure of carbon fixation pathways. *Biochimica et Biophysica Acta (BBA) -*  
1336 *Bioenergetics* 1817:1646–1659.
- 1337 104. Feist AM, Henry CS, Reed JL, Krummenacker M, Joyce AR, Karp PD, Broadbelt LJ,  
1338 Hatzimanikatis V, Palsson BØ. 2007. A genome-scale metabolic reconstruction for

- 1339 Escherichia coli K-12 MG1655 that accounts for 1260 ORFs and thermodynamic  
1340 information. *Molecular Systems Biology* 3:121.
- 1341 105. Elbourne LDH, Tetu SG, Hassan KA, Paulsen IT. 2017. TransportDB 2.0: a database for  
1342 exploring membrane transporters in sequenced genomes from all domains of life.  
1343 *Nucleic Acids Research* 45:D320–D324.
- 1344 106. Saier MH, Reddy VS, Tsu BV, Ahmed MS, Li C, Moreno-Hagelsieb G. 2016. The  
1345 Transporter Classification Database (TCDB): recent advances. *Nucleic Acids Res*  
1346 44:D372–D379.
- 1347 107. NCBI Resource Coordinators. 2017. Database Resources of the National Center for  
1348 Biotechnology Information. *Nucleic Acids Research* 45:D12–D17.
- 1349 108. Jeske L, Placzek S, Schomburg I, Chang A, Schomburg D. 2019. BRENDA in 2019: a  
1350 European ELIXIR core data resource. *Nucleic Acids Res* 47:D542–D549.
- 1351 109. Fritzeimer CJ, Hartleb D, Szappanos B, Papp B, Lercher MJ. 2017. Erroneous energy-  
1352 generating cycles in published genome scale metabolic networks: Identification and  
1353 removal. *PLOS Computational Biology* 13:e1005494.
- 1354 110. Noor E. 2018. Removing both Internal and Unrealistic Energy-Generating Cycles in Flux  
1355 Balance Analysis. *arXiv:180304999 [q-bio]*.
- 1356 111. Haraldsdóttir HS, Cousins B, Thiele I, Fleming RMT, Vempala S. 2017. CHRR: coordinate  
1357 hit-and-run with rounding for uniform sampling of constraint-based models.  
1358 *Bioinformatics* 33:1741–1743.

- 1359 112. Kaufman DE, Smith RL. 1998. Direction Choice for Accelerated Convergence in Hit-and-  
1360 Run Sampling. *Operations Research* 46:84–95.
- 1361 113. Megchelenbrink W, Huynen M, Marchiori E. 2014. optGpSampler: An Improved Tool for  
1362 Uniformly Sampling the Solution-Space of Genome-Scale Metabolic Networks. *PLOS*  
1363 *ONE* 9:e86587.
- 1364 114. Kieser T, Bibb MJ, Buttner M, Chater K, Hopwood DA. 2000. *Practical Streptomyces*  
1365 *Genetics*. John Innes Foundation, Norwich, UK.
- 1366 115. Claessen D, Rink R, Jong W de, Siebring J, Vreugd P de, Boersma FGH, Dijkhuizen L,  
1367 Wösten HAB. 2003. A novel class of secreted hydrophobic proteins is involved in aerial  
1368 hyphae formation in *Streptomyces coelicolor* by forming amyloid-like fibrils. *Genes Dev*  
1369 17:1714–1726.
- 1370 116. Bystrykh LV, Fernández-Moreno MA, Herrema JK, Malpartida F, Hopwood DA,  
1371 Dijkhuizen L. 1996. Production of actinorhodin-related “blue pigments” by  
1372 *Streptomyces coelicolor* A3(2). *J Bacteriol* 178:2238–2244.
- 1373 117. Gubbens J, Janus M, Florea BI, Overkleeft HS, van Wezel GP. 2012. Identification of  
1374 glucose kinase-dependent and -independent pathways for carbon control of primary  
1375 metabolism, development and antibiotic production in *Streptomyces coelicolor* by  
1376 quantitative proteomics. *Molecular Microbiology* 86:1490–1507.
- 1377 118. Wessel D, Flügge UI. 1984. A method for the quantitative recovery of protein in dilute  
1378 solution in the presence of detergents and lipids. *Anal Biochem* 138:141–143.

- 1379 119. Rappsilber J, Mann M, Ishihama Y. 2007. Protocol for micro-purification, enrichment,  
1380 pre-fractionation and storage of peptides for proteomics using StageTips. *Nat Protoc*  
1381 2:1896–1906.
- 1382 120. Distler U, Kuharev J, Navarro P, Levin Y, Schild H, Tenzer S. 2014. Drift time-specific  
1383 collision energies enable deep-coverage data-independent acquisition proteomics. *Nat*  
1384 *Methods* 11:167–170.
- 1385 121. Andrews S. 2016. FastQC: a quality control tool for high throughput sequence data.
- 1386 122. Kim D, Langmead B, Salzberg SL. 2015. HISAT: a fast spliced aligner with low memory  
1387 requirements. *Nat Methods* 12:357–360.
- 1388 123. Li H, Handsaker B, Wysoker A, Fennell T, Ruan J, Homer N, Marth G, Abecasis G, Durbin  
1389 R, 1000 Genome Project Data Processing Subgroup. 2009. The Sequence  
1390 Alignment/Map format and SAMtools. *Bioinformatics* 25:2078–2079.
- 1391 124. Okonechnikov K, Conesa A, García-Alcalde F. 2016. Qualimap 2: advanced multi-sample  
1392 quality control for high-throughput sequencing data. *Bioinformatics* 32:292–294.
- 1393 125. Battke F, Nieselt K. 2011. Mayday SeaSight: combined analysis of deep sequencing and  
1394 microarray data. *PLoS ONE* 6:e16345.
- 1395 126. Huang DW, Sherman BT, Lempicki RA. 2009. Bioinformatics enrichment tools: paths  
1396 toward the comprehensive functional analysis of large gene lists. *Nucleic Acids Res*  
1397 37:1–13.
- 1398 127. Huang DW, Sherman BT, Lempicki RA. 2009. Systematic and integrative analysis of large  
1399 gene lists using DAVID bioinformatics resources. *Nat Protoc* 4:44–57.

- 1400 128. Szklarczyk D, Gable AL, Lyon D, Junge A, Wyder S, Huerta-Cepas J, Simonovic M,  
1401 Doncheva NT, Morris JH, Bork P, Jensen LJ, Mering C von. 2019. STRING v11: protein-  
1402 protein association networks with increased coverage, supporting functional discovery  
1403 in genome-wide experimental datasets. *Nucleic Acids Res* 47:D607–D613.
- 1404 129. Perez-Riverol Y, Csordas A, Bai J, Bernal-Llinares M, Hewapathirana S, Kundu DJ,  
1405 Inuganti A, Griss J, Mayer G, Eisenacher M, Pérez E, Uszkoreit J, Pfeuffer J, Sachsenberg  
1406 T, Yilmaz S, Tiwary S, Cox J, Audain E, Walzer M, Jarnuczak AF, Ternent T, Brazma A,  
1407 Vizcaíno JA. 2019. The PRIDE database and related tools and resources in 2019:  
1408 improving support for quantification data. *Nucleic Acids Res* 47:D442–D450.
- 1409
- 1410
