1 Genome-scale Model Constrained by  
2 Proteomics Reveals Metabolic Changes in  
3 *Streptomyces coelicolor* M1152  
4 Compared to M145

5

6 Snorre Sulheim<sup>1,2</sup>, Tjaša Kumelj<sup>2</sup>, Dino van Dissel<sup>1</sup>, Ali Salehzadeh-Yazdi<sup>3</sup>, Chao Du<sup>4</sup>, Gilles P.  
7 van Wezel<sup>4</sup>, Kay Nieselt<sup>5</sup>, Eivind Almaas<sup>2,6</sup>, Alexander Wentzel<sup>1</sup>, Eduard J Kerkhoven<sup>7,8,\*</sup>

8 1. Department of Biotechnology and Nanomedicine, SINTEF Industry, Trondheim,  
9 Norway

10 2. Network Systems Biology Group, Department of Biotechnology and Food Science,  
11 NTNU - Norwegian University of Science and Technology, Trondheim, Norway

12 3. Department of Systems Biology and Bioinformatics, Faculty of Computer Science and  
13 Electrical Engineering, University of Rostock, Rostock, Germany

14 4. Microbial Biotechnology, Institute of Biology, Leiden University, Leiden, The  
15 Netherlands

16 5. Integrative transcriptomics, Center for Bioinformatics, University of Tübingen,  
17 Tübingen, Germany

- 18        6. K.G. Jebsen Center for Genetic Epidemiology, Department of Public Health and  
19            General Practice, NTNU - Norwegian University of Science and Technology,  
20            Trondheim, Norway
- 21        7. Systems and Synthetic Biology, Department of Biology and Biological Engineering,  
22            Chalmers University of Technology, Gothenburg, Sweden
- 23        8. Novo Nordisk Foundation Center for Biosustainability, Chalmers University of  
24            Technology, Gothenburg, Sweden
- 25        \* Corresponding author. Email: [eduardk@chalmers.se](mailto:eduardk@chalmers.se)

## 26    Abstract

27    Many biosynthetic gene clusters (BGCs) in the genomes of environmental microorganisms  
28    require heterologous expression in order to realize their genetic potential, including cryptic  
29    and metagenomic BGCs. *Streptomyces coelicolor* M1152 is a widely used host strain for the  
30    heterologous expression of BGCs, as it has been genetically engineered for this purpose via  
31    the deletion of four of its native biosynthetic gene clusters (BGCs) and the introduction of a  
32    point mutation in the *rpoB* gene that encodes the beta subunit of RNA polymerase. This  
33    latter mutation was shown to have a strong positive impact on antibiotic biosynthesis that  
34    remains poorly understood. Therefore, a systemic understanding of the consequences on  
35    cellular metabolism of the genomic changes of M1152 could greatly contribute to this  
36    understanding. Here we carried out a comparative analysis of M1152 and its ancestor strain  
37    M145, connecting observed phenotypic differences to changes in transcript and protein  
38    abundance. Measured protein abundance was used to constrain an amended genome-scale  
39    model (GEM) and to predict metabolic fluxes. This approach connects observed differences  
40    in growth rate and glucose consumption to changes in central carbon metabolism,

41 accompanied by differential expression of important regulons. Our results suggest that  
42 precursor availability is not limiting the biosynthesis of secondary metabolites. This implies  
43 that alternative strategies could be beneficial for further development of *S. coelicolor* for  
44 heterologous production of novel compounds.

## 45 Importance

46 This study provides the first systems description of *S. coelicolor* M1152, an engineered host  
47 widely used for the heterologous expression of BGCs directing the synthesis of natural  
48 products. By combining time-series proteomics and transcriptomics, batch fermentation  
49 data and genome-scale modelling, we can connect observed phenotypes to known genetic  
50 modifications and find extensive metabolic rewiring in the M1152 strain compared to the  
51 wild-type strain M145. Our study indicates that the deletion of secondary metabolite  
52 biosynthetic pathways thought to enhance precursor availability, only has a minor impact on  
53 the ability of the modified strain to produce heterologous molecules. In contrast, the *rpoB*  
54 mutation is likely responsible for the most dramatic changes in regulatory features and  
55 precursor availability. The amended genome-scale model, reconstructed in an open-science  
56 framework, allowed us to contextualize the transcriptional changes. This framework  
57 facilitates further development by the research community in an organized manner,  
58 including version control, continuous integration and quality control and tracking of  
59 individual contributions.

## 60 Introduction

61 The bacterium *Streptomyces coelicolor* has been the *de facto* model actinomycete for the  
62 production and regulation of antibiotics (1). Being known for over 100 years, the interest in

63 this organism predates the golden age of antibiotic research. With its complex life cycle,  
64 featuring mycelial growth and differentiation, spore formation, programmed cell death and  
65 the ability to produce multiple secondary metabolites, including calcium-dependent  
66 antibiotic (CDA) and the conveniently coloured actinorhodin (Act, blue) and  
67 undecylprodigiosin (Red, red), it has assisted greatly in our understanding how  
68 streptomycetes sense their surrounding (2–6), activate their developmental cycle (7) and  
69 regulate the production of antibiotics (8, 9). Further aided by the publication of its genome  
70 sequence (10), the antibiotic coelimycin P1 (yellow), produced from the formerly cryptic  
71 polyketide gene cluster known as *cpk*, was added to this list (11). Today, the widespread use  
72 of *S. coelicolor* continues as a host for heterologous production of biosynthetic gene clusters  
73 (BGCs) (12–17). Heterologous expression is a powerful strategy for novel compound  
74 discovery from BGCs that are either natively silent or originate from an unculturable source  
75 (18). Both are large untapped resources of microbial biodiversity, nowadays made evident  
76 and accessible due to recent advances within the fields of metagenomics, molecular biology  
77 and bioinformatics (19).

78 The efficiency of *S. coelicolor* as a heterologous production host relies on a metabolism that  
79 has evolved to provide the necessary precursors to produce a broad range of complex  
80 molecules. Many of these molecules are produced when the strain is experiencing nutrient-  
81 limiting conditions that lead to growth cessation and complex re-modelling of its metabolism  
82 (20). Metabolic switching in *S. coelicolor* M145 in response to phosphate and glutamate  
83 depletion has previously been studied in detail at a wide variety of metabolic levels (1–3),  
84 unravelling a complex sequence of switching events that ultimately lead to the biosynthesis  
85 of the antibiotics CDA, Red and Act. The biosynthesis of coelimycin P1 occurs earlier than the

86 three other compounds in the growth cycle and appears to be independent of the major  
87 metabolic switch (8).

88 To improve *S. coelicolor* M145 as a host for heterologous BGCs expression, strain M1146 was  
89 created by the sequential deletion of its four major BGCs (*act*, *red*, *cda* and *cpk*) (13). This  
90 should increase precursor availability for the production of a whole range of heterologous  
91 products and provides a cleaner chromatographic background to easier identify novel  
92 compounds. *S. coelicolor* M1152 is a derivative of M1146, that besides the deletion of the  
93 four main BGCs bears the C1298T point mutation in the *rpoB* gene that encodes the beta  
94 subunit of RNA polymerase. This mutation was shown to have strong positive effects on the  
95 production of various antibiotics (13, 22). Up to now, M1152 is a preferred general  
96 'superhost' for heterologous BGC expression (12, 16, 23–25) and is the starting point for  
97 further strain development.

98 A hurdle in further development of *S. coelicolor* as a 'superhost' is the limited knowledge of  
99 M1152 metabolism and its regulatory systems, even if some insight can be gained from  
100 analysing snapshots of gene expression levels during regular time intervals of a batch  
101 fermentation (26–30). Since enzymes are catalysing most metabolic transformations,  
102 assessing protein abundance or gene expression contributes to the elucidation of metabolic  
103 behaviour. Here, we therefore apply proteomics data as constraints (31) on a genome-scale  
104 metabolic model (GEM) of *S. coelicolor* to reveal how proteome changes affect the  
105 metabolic fluxes during the different stages of growth and development, and how the  
106 metabolism of *S. coelicolor* M1152 differs from its parent strain, M145.

107 GEMs are both valuable resources of strain-specific knowledge, mathematical models able to  
108 predict steady-state flux distributions, and frameworks for interpretation and integration of

109 different ‘omics’ data, e.g. transcriptomics and proteomics (32). The increased interest in  
110 using genome-scale models of *S. coelicolor* is conspicuous. Since the first reconstruction in  
111 2005 (33), five GEMs have been published (15, 34–37), including three in 2018: iKS1317 (15),  
112 Sco4 (37) and iAA1259 (35). Additionally, as a model organism for the *Actinomycetes*, the  
113 GEMs of *S. coelicolor* are frequently used as template for model development of closely  
114 related strains (38), such as *S. clavuligerus* (39), *Saccharopolyspora erythraea* (40) and *S.*  
115 *lividans* (41). The recent updates of the *S. coelicolor* GEM were developed in parallel by  
116 different research groups: while all groups share the common interest of utilizing a high-  
117 quality model for predictions and data analysis, the prevailing approach of independent  
118 parallel development is inefficient. Additional to duplicating a considerable amount of work,  
119 lack of common standards for documentation of progress and issues, evaluation of model  
120 performance, as well as the use of different annotations makes it cumbersome to compare  
121 and merge models.

122 To increase the rate and quality of model reconstruction, in this study two research groups  
123 of the Sco-GEM community, responsible for two of the latest model updates (15, 37), have  
124 joined forces to merge existing GEMs of *S. coelicolor* into one consensus-model that is  
125 publicly hosted on GitHub and can be continuously updated and improved by all members of  
126 the community. Hosting the model on GitHub has many advantages: (i) open access and  
127 contribution; (ii) version control; (iii) continuous development and integrated quality control  
128 with memote (42); (iv) new improvements released instantly (no publication lag time); and  
129 (v) complete documentation of model reconstruction. Such an approach has historic  
130 precedents: model reconstruction as a community effort has been a success for the human  
131 GEM (43), baker’s yeast (44–49) and Chinese Hamster Ovary cells (50). The recent  
132 developments in *S. coelicolor* model and strain improvements in different research groups

133 prove that it is an opportune time now to join forces in the *Streptomyces* modelling efforts  
134 as well.

## 135 Results

### 136 Improvement of Sco-GEM

137 We conducted a stepwise reconstruction of Sco-GEM, the consensus genome-scale  
138 metabolic model of *S. coelicolor*, while tracking development using Git for version control  
139 (**Figure 1A; Data Set S1, Tab 1**). Sco-GEM is the most comprehensive and highest quality  
140 GEM of this organism (**Figure 1B**), comprising 1777 genes, 2612 reactions, 2073 metabolites  
141 and a memote score of 77%, which is indicative of the overall model quality (42). Sco-GEM  
142 features an accuracy of 96.5% and 74.5% (**Figure 1C**) in predicting correct phenotypes for  
143 growth environments and knockout mutants, respectively, yielding in total a Matthews  
144 Coefficient of Correlation of 0.53 with the test data previously described (15).

145 Sco-GEM has been reconstructed by curating the recently published iKS1317 model (15) to  
146 include genes, reactions and metabolites from the equally recently published models  
147 iAA1259 (35) and Sco4 (37). While the curations from iAA1259 were primarily related to  
148 coelimycin P1, butyrolactone, xylan and cellulose pathways, the 377 reactions added to Sco-  
149 GEM from Sco4 were scattered across a large range of different subsystems, covering both  
150 primary and secondary metabolism (**Figure S1**).

151 Subsequent to merging the existing *S. coelicolor* GEMs, we performed a number of further  
152 curations of the model: including improvement of annotations, both in terms of coverage  
153 and number of different databases, e.g. KEGG (51, 52), BioCyC (53), ChEBI (54) and  
154 MetaNetX (55). All reactions and metabolites have been given identifiers according to the

155 BiGG namespace (56), and all reactions are categorized into 15 different subsystems,  
156 covering 128 different pathways.

157 The biomass composition was curated to reflect estimated levels of prosthetic groups that  
158 are associated to cellular proteins. Proteomics data, as discussed below, were used to  
159 estimate protein levels, while UniProt (57) provided annotations of proteins with prosthetic  
160 groups, which was used to estimate overall prosthetic group levels (**Data Set S1, Tab 2**).

161 Reaction reversibility updated for almost a third of queried reactions

162 The determination of reaction directionality and reversibility is an important step in a GEM  
163 reconstruction (58). However, the thermodynamic consistency of reactions was not  
164 considered in previous *S. coelicolor* models. We calculated Gibbs free energy changes for 770  
165 of the 2612 model reactions (**Data Set S1, Tab 3**) using eQuilibrator (59), and inconsistencies  
166 in assigned reaction bounds transpired from a significant overlap of the range of Gibbs free  
167 energies between reversible and irreversible reactions (**Figure 1D**). A relatively lenient  
168 threshold of  $-30$  kJ/mol was defined to classify a reaction as irreversible; with the intent not  
169 to over-constrain the model (**Figure 1E**). The proposed changes in reversibility were  
170 evaluated against growth and knockout data (15), discarding 59 of 770 of the proposed  
171 reactions. Consequentially, the flux bounds of 273 reactions were modified, while all ATP-  
172 driven reactions were manually curated and generally assumed irreversible, unless they had  
173 an estimated positive change in Gibbs free energy or were known to be reversible. Examples  
174 of this include nucleoside diphosphate kinase (60) and ATP synthase (61).

175 Curation of transport reactions

176 As transport reactions have previously not been extensively curated in *S. coelicolor* models,  
177 we performed a thorough curation of transporters by querying various databases and BLAST



178 analysis as detailed in Materials and Methods. This culminated in adding 43 new transport  
179 reactions and updating 39 of the 262 existing reactions in Sco-GEM (**Figure 1F; Data Set S1,**  
180 **Tab 4**). The majority of the transporters comprises primary active transport proteins and  
181 secondary carriers (46%), in accordance with previous work (62). Most primary active  
182 transporters are ATP-binding cassette (ABC) transporters (30%), while proton symports  
183 (30%) dominate the secondary carriers.

184 Development of the enzyme-constrained model EcSco-GEM

185 To include explicit constraints regarding enzymes catalysing metabolic reactions, the GECKO  
186 formalism (31) was applied to introduce enzyme turnover rates ( $k_{\text{cat}}$ ) and prepare the model  
187 for integration of proteome data. Note that this approach regards the maximum catalytic  
188 activities but does not consider other kinetic parameters such as affinity constants. The flux  
189 variability of the resulting enzyme-constrained model (EcSco-GEM) is strongly reduced  
190 compared to the classic genome-scale model (**Figure 1G**), as infeasible solutions due to  
191 limitation in protein allocation are discarded, significantly improving model predictions.  
192 From this, 17 time- and strain-specific EcSco-GEM models were generated by incorporation  
193 of estimated growth-, secretion- and uptake rates, as well as proteome data from  
194 cultivations that are detailed and analysed below.

195 Framework for further development of Sco-GEM by the community

196 The Sco-GEM model is hosted as an open repository as suggested by memote, a recently  
197 developed tool for transparent and collaborative model development (42). The memote tool  
198 is incorporated in the repository through Travis CI and tracks the model development on  
199 every change of the model. Sco-GEM v1.2.0 achieved a memote-score of 77%, which is  
200 superior to any previous model of *S. coelicolor* (**Figure 1B; Supplemental Information**).

201 Hosting Sco-GEM on GitHub with memote integration ensures continuous quality control  
202 and enables public insight into all aspects of model reconstruction and curation: any user  
203 can report errors or suggest changes through issues and pull requests. As contributions to  
204 the model development are fully trackable and can therefore be credited fairly, Sco-GEM is  
205 positioned as a community model that we envision to be continuously updated and widely  
206 used by the *S. coelicolor* research community.

207 In the remaining parts of the Results section, we have applied Sco-GEM along with  
208 transcriptome and proteome data, to study and compare the responses of *S. coelicolor*  
209 M145 and M1152 to phosphate depletion on a systems level and for the first time provide  
210 detailed insight into the distinct physiological features of engineered 'superhost' strain  
211 M1152, which will be of value for its further development.

212

213 The enzyme-constrained model connects regulatory changes in *S. coelicolor* M145 in  
214 response to phosphate depletion with the production of the major secondary  
215 metabolites.

216 To evaluate whether the (Ec)Sco-GEM models can simulate behaviours of *S. coelicolor*  
217 metabolism, we performed and analysed time-course sampled cultivations of secondary  
218 metabolite producing strain M145 in the context of the generated models. For that purpose,  
219 *S. coelicolor* M145 was cultivated in batch fermentations using standardized protocols  
220 reported earlier (20). Cultures were sampled for 'omics data, as well as substrate utilization  
221 and secondary metabolite measurements to identify regulatory, proteomic and metabolic  
222 changes during the metabolic switch. The online and offline measurements showed that  
223 phosphate depletion in the cultivation medium was reached approximately 35 hours after

224 inoculation. Shortly after, the culture growth ceased, and first Red and subsequently Act  
225 were detected in the culture medium (**Figure 2A and 2B**). Both D-glucose and L-glutamate  
226 were consumed concomitantly, and their consumption continued after phosphate depletion,  
227 while both remained in excess until the end of cultivation. Note that *Streptomyces* can utilize  
228 intracellular phosphate storages after the medium is phosphate depleted (63). The RNA-seq  
229 and untargeted proteomic data were analysed in the light of previous studies (8, 9) and were  
230 in good agreement with data previously obtained from microarrays or targeted proteomics  
231 (8, 34) (**Figure 2C and S2**). This confirmed the high reproducibility of the experiments across  
232 independent cultivations and high reliability of the chosen cultivation and analytic  
233 procedures (**Figure 2**).

234 The proteome data were incorporated into EcSco-GEM to yield time-specific metabolic  
235 models of M145, giving insight on the changes occurring in the metabolic activity of different  
236 pathways during batch cultivation. Metabolic fluxes were estimated using an unbiased  
237 approach of random sampling, as alternative to optimization of a well-defined cellular  
238 objective used in flux balance analysis (64). It is possible that *S. coelicolor* is wired to  
239 maximize its growth rate prior to phosphate depletion, but after the metabolic switch, it is  
240 difficult to define a clear cellular objective. We applied an approach that samples the  
241 vertices of the solution space (65), and used their mean values to compare the metabolic  
242 fluxes between the two strains and between different time points. The general overview  
243 from **Figure 2D** is an initial validation of the model. It shows that the metabolic switch  
244 induces a large shift in global gene expression (8) and predicts that the most drastic changes  
245 in fluxes occur in response to phosphate depletion.

246 The response to phosphate depletion from the medium is achieved by a set of genes,  
247 positively regulated by PhoP, that are involved in phosphate scavenging, uptake and saving  
248 (66–68). The metabolic switch can be readily identified by the rapid upregulation of this  
249 regulon after 35 hours of cultivation in M145 and 47 hours in M1152 (**Figure 2C**). PhoP also  
250 negatively regulates nitrogen assimilation (69), which can partly explain the change in amino  
251 acids metabolism after phosphate depletion. Indeed, from the RNA-seq data we find that  
252 glutamate import, the glutamate sensing system *gluR-gluK* (70), *glnR* (71) and *glnA* are  
253 downregulated immediately subsequent to phosphate depletion (**Figure S3**). Since PhoP is  
254 also known to regulate negatively the biosynthesis of secondary metabolites, the switching  
255 of its expression likely delays these pathways (69, 72). However, after 37 hours of cultivation  
256 the upregulation of the *cda* and *red* genes was observed, whereas that of the *act* genes was  
257 initiated at 41 hours (**Figure 2E**). Production of Red and Act was measurable in the culture  
258 medium after 41 and 49 hours of cultivation, respectively (**Figure 2B**). The enzyme-  
259 constrained models predict an immediate increase in fluxes through the biosynthetic  
260 pathways for the four main compounds Act, Red, CDA and coelimycin P1 after the metabolic  
261 switch (**Figure 2D**).

262 The onset of secondary metabolism is strongly correlated with an increase in oxidative  
263 phosphorylation and a decrease in fatty acid biosynthesis in M145.

264 The metabolic switch was shown to be correlated with an enhanced degradation of  
265 branched-chain amino acids (valine, leucine and isoleucine), an increase in oxidative  
266 phosphorylation and a decrease in fatty acid biosynthesis (**Figure 2D and S4**). An active  
267 oxidative phosphorylation relies on an active TCA cycle that generates reduced co-factors  
268 whose re-oxidation by the respiratory chain generates a proton gradient that drives ATP  
269 synthesis by the ATP synthase. The feeding of the TCA cycle requires acetyl-CoA, as well as

270 nitrogen. Nitrogen likely originates from degradation of glutamate and branched-chain  
271 amino acids, whereas acetyl-CoA likely originates from glycolysis, as well as from the  
272 degradation of these amino acids as previously demonstrated (73). Indeed, the model  
273 predicts an increased flux through citrate synthase feeding acetyl-CoA into the TCA cycle  
274 (**Figure S5A**). The predicted increase in oxidative phosphorylation is supported by the RNA-  
275 seq data showing upregulation of enzymes belonging to the respiratory chain (**Figure S5B**).  
276 This is consistent with the clear correlation previously reported between high ATP/ADP ratio,  
277 resulting from an active oxidative phosphorylation, and actinorhodin production (74).  
278 Furthermore, the consumption of acetyl-CoA by the TCA cycle to support the oxidative  
279 metabolism logically impairs fatty acids biosynthesis (74).

280

281 The pentose phosphate pathway provides the main redox cofactor NADPH for polyketide  
282 biosynthesis, as well as to combat oxidative stress, and its model-predicted flux increase  
283 upon initiation of polyketide synthesis is in agreement with previous studies (75, 76). A clear  
284 positive correlation was also noticed between the biosynthesis of alanine, aspartate and  
285 glutamate, which are precursors for CDA and/or coelimycin P1 (**Figure 2D**) and the  
286 biosynthesis of these antibiotics. Similar observations were made in the antibiotic-producing  
287 *Amycolatopsis sp.* (77). Our EcSco-GEM model proved to be in good agreement with  
288 previously reported findings, indicating that it is able to capture *S. coelicolor* metabolic  
289 behaviour.

290 Model-assisted characterization of engineered *S. coelicolor* M1152 and its responses  
291 to phosphate depletion.

292 As detailed above, EcSco-GEM shed a new light on the metabolic switch in secondary  
293 metabolite producing strain M145. *S. coelicolor* M1152 (13) is a M145 derivative devoid of  
294 the four major BGCs and bearing a point mutation in the *rpoB* gene. A better systemic  
295 understanding of M1152 metabolism would benefit to its further development as a  
296 performing host. To do so, a comparative analysis of gene expression levels and metabolic  
297 fluxes was carried out in the strains M145 and M1152.

298 Batch cultivations of M1152 were performed using identical conditions and comparable  
299 sampling regimes as for M145 reported above. This enabled a direct comparison of the two  
300 strains at a systems level, revealing both expected and unexpected effects of the strains'  
301 genetic differences (**Figure 3**). As anticipated, the products of the Cpk, CDA, Red, and Act  
302 biosynthetic pathways were undetectable in M1152 (**Figure 3A**). As previously observed  
303 (13), the growth rate of M1152 is reduced compared to M145 ( $0.15 \text{ h}^{-1}$  vs  $0.21 \text{ h}^{-1}$  in the  
304 initial exponential growth phase), delaying phosphate depletion by M1152 to 47 hours after  
305 inoculation (**Figure 3A**).

306 The sampling time points for proteome and transcriptome were adjusted accordingly (**Figure**  
307 **3B**), enabling pairwise comparison of measurements between the two strains. Genes  
308 responsive to phosphate depletion, members of the PhoP regulon (8), were used to align the  
309 different sample datasets for M145 or M1152 (**Figure 3C**). Interestingly, most of the  
310 responses of M145 to phosphate depletion were retained in M1152 (**Figure 3D**). Principle  
311 component analysis of the proteome data confirms high consistency between corresponding  
312 biological replicates and incremental changes between sample points for both M145 and

313 M1152 (mainly explained by PC1: 18.6% variance, **Figure 3E**). A clear strain dependent  
314 clustering of the data (PC2: 15.5% variance) indicates global significant differences at the  
315 protein level. EcSco-GEM was subsequently used to predict metabolic changes in M1152  
316 (**Figure 3E**).

317 The different glutamate and glucose consumption rates of M145 and M1152 (**Figure 4A and**  
318 **4B**) resulted in substantial metabolic differences between the two strains prior to phosphate  
319 depletion. During cultivation on SSBM-P medium, where glutamate is the sole nitrogen  
320 source, glucose and glutamate are co-consumed. M1152, as M1146 (74), has a reduced  
321 specific glucose uptake rate compared to M145. It thus obtains a larger share of its carbon  
322 from glutamate (**Figure 4A and 4B**) and has consequently also a higher nitrogen availability  
323 than M145. A reduced flux through glycolysis has also been reported previously for strain  
324 M1146 (78). This might be an effect of the predicted increased concentration of ATP in  
325 M1146 compared to M145, which inhibits glucose uptake and phosphofructokinase (74, 78).  
326 Since Act was proposed to act as an electron acceptor reducing the efficiency of the  
327 oxidative phosphorylation, it is suggested that the lack of Act in M1146 causes the elevated  
328 ATP levels (74). However, we find the largest difference in glycolytic flux at early time points,  
329 prior to phosphate depletion and Act production in M145, proving that Act itself cannot  
330 explain this observation.

331 The EcSco-GEM predicts the consequences of the reduced glucose uptake of M1152 on its  
332 central carbon metabolism (**Figure 4C**). A less active glycolysis in M1152 than in M145 leads  
333 to a lower carbon flow towards acetyl-CoA and thus lower excretion of acetate compared to  
334 M145 (**Figure 4B**). Furthermore, EcSco-GEM reveals an increased flux from glutamate to  
335 alpha-ketoglutarate. Indeed, a fraction of the pool of oxaloacetate might be converted into

336 alpha-ketoglutarate by aspartate transaminase to feed the TCA cycle. The rest might be  
337 converted into phosphoenolpyruvate (PEP) by PEP carboxykinase for gluconeogenesis, since  
338 PEP carboxykinase was shown to carry higher fluxes in M1152 than in M145 (**Figure 4C**).

339 Since recent studies have demonstrated a reverse correlation between antibiotic and  
340 triacylglycerol biosynthesis in *S. lividans* and *S. coelicolor* (74, 79), one can speculate that the  
341 acetyl-CoA/malonyl-CoA units yielded by glycolysis for the biosynthesis of antibiotics in  
342 M145 are being used for enhanced growth and/or fatty acids and TAG biosynthesis in  
343 M1152. However, this is likely not the case, as M1152 has rather a reduced growth rate  
344 compared to M145, and fatty acid biosynthesis remains downregulated after the switch  
345 (**Figure 5**). It is noteworthy that the flux toward this acetyl-CoA/malonyl-CoA sink is still 3- to  
346 6-fold larger than the total flux going into secondary metabolite biosynthesis. We thus  
347 propose that together with enhanced nitrogen availability, acetyl-CoA made available from  
348 the deletion of these BGCs is used to feed the TCA cycle to support the oxidative metabolism  
349 in M1152. This would generate oxidative stress whose toxic effects might be responsible for  
350 the growth delay of this strain.

351 Transcriptome analysis reveal differential expression of global regulators

352 While the proteome data are an integral part of the EcSco-GEM models, RNA-seq data were  
353 used to both verify the trends and to gain further insights in the regulatory changes that are  
354 not captured by the metabolic models. As the proteomic data, the RNA-seq data showed  
355 large global differences between M1152 and M145, revealing 499 differentially expressed  
356 genes with a significance threshold of  $p < 0.01$ .

357 Unsupervised clustering of the significantly changed genes reveal differences in regulatory  
358 systems related to redox regulation, signalling and secondary metabolism. The significantly



359 changed genes were clustered into 7 groups with K-means clustering, with clusters 1-3  
360 containing genes that are upregulated in M1152 compared to M145 and clusters 4-7 vice  
361 versa (**Figure S6A and Data Set S1, Tab 5**). A Gene Ontology (80, 81) enrichment analysis of  
362 the seven clusters was conducted to identify upregulated processes in each of the two  
363 strains (**Figure S7, cf. Figure S6A**).

364 The enriched processes upregulated in M1152 point to increased oxidative stress (**Figure S7**):  
365 antioxidant and peroxidase activity (SCO2633 [sodF]; SCO4834-35) in addition to  
366 biosynthesis of carotenoid (SCO0185–SCO0188), a known antioxidant (82, 83). The putative  
367 proteins within the cytochrome-P450 family (SCO7416–SCO7422) found in cluster 1 might  
368 also be linked to increased oxidative stress (84), but also to oxidation of precursors used for  
369 the synthesis of macrolides (85). Indeed, by comparing the time series expression levels for  
370 genes related to oxidative stress we observe that the majority of genes related to oxidative  
371 stress are upregulated in M1152 (**Figure 6**). These changes correlate to a more active  
372 oxidative metabolism and TCA cycle as predicted by Ec-SCOGEN (**Figure 4**).

373 In cluster 2 we find *scbA* (SCO6266) and its downstream gene *scbC* (SCO6267), which stands  
374 out by being almost 6-fold upregulated in M1152. This high expression level is likely due to  
375 the deletion of *scbR2* (SCO6286), the last gene selected to be part of the *cpk* BGC (86).  
376 Besides regulation of the *cpk* cluster, ScbR2 binds upstream of several global regulators of  
377 development and secondary metabolism, including AfsK, SigR, NagE2, AtrA, AdpA and ArgR  
378 (87). It also acts together with ScbR to regulate ScbA, which produces the  $\gamma$ -butyrolactone  
379 SCB1. However, when looking at the genes regulated by ScbR (87), we only observe a clear  
380 difference in expression for genes regulated by AfsR (phosphorylated by AfsK) (88, 89), while  
381 this is not the case for genes regulated by ArgR, AdpA or ScbR itself (**Figure S5C-F**).

382 Amongst the genes upregulated in M145, in cluster 4 we find genes related to the redox  
383 regulated transcription factor SoxR (90), and a similar pattern is observed for the entire SoxR  
384 regulon (**Figure S6B**). SoxR is known to react directly to the presence of actinorhodin (91,  
385 92), and indeed, in M145 this group of genes follows the production profile of actinorhodin,  
386 while their expression remains low in M1152 since Act is not produced. The benzoquinone  
387 Act, as electron acceptor, is thought to reduce respiration efficiency and thus energy charge  
388 as well as to combat oxidative stress (74). Consistently, the RNA-seq data revealed that the  
389 ATP-synthase gene cluster (SCO5366–SCO5374) was upregulated almost 2-fold in M1152  
390 compared to M145, most prominently in the stationary phase during Act production (**Figure**  
391 **S6C**). This agrees with observations in the M1146 strain (78). Cluster 4 also contains the  
392 genes directly up- and downstream of the deleted actinorhodin BGC in M1152 (SCO5071–  
393 SCO5072, encoding 3-hydroxyacyl-CoA dehydrogenase, and SCO5091–SCO5092, encoding a  
394 two-component flavin-dependent monooxygenase system) (93). In clusters 5, 6 and 7 we  
395 find genes with reduced expression in M1152, and the enriched processes are related to  
396 cellular and iron ion homeostasis, development, signalling and morphology. This  
397 corresponds to the delayed sporulation observed for M1152 (13).

#### 398 [Elevated expression of ribosomal proteins in M1152 after phosphate depletion](#)

399 An increased transcription of genes encoding ribosomal proteins could be observed in  
400 M1152 after phosphate depletion (**Figure S6D**). The *rpoB* mutation of the RNA polymerase  
401 present in M1152 is thought to induce a conformational change mimicking the binding of  
402 guanosine tetraphosphate (ppGpp) to this enzyme (22). ppGpp is synthesized in response to  
403 nutritional stress and reduces the transcription of genes related to active growth, such as  
404 genes encoding ribosomal RNAs and ribosomal proteins (94), whereas it up-regulates those

405 involved in development/differentiation and antibiotic production (95, 96). In consequence  
406 the up-regulation of ribosomal proteins was unexpected in M1152, especially since the  
407 expression of the ppGpp regulon was not found to be significantly changed in M1152 (**Figure**  
408 **S5G and S5H**). However, since high nucleoside triphosphate levels are known to have a  
409 positive impact on ribosome synthesis (97), we hypothesize that the higher ATP content of  
410 M1152 compared to M145, after phosphate depletion, may be responsible for the  
411 differences in expression of ribosomal proteins. Such difference in ribosomal protein  
412 expression is mainly seen in the antibiotic production phase and correlated with production  
413 of Act in M145, which has a negative impact on the energetic state of the cell (74).

414 [Reduced production of the polyketide germicidin in M1152](#)

415 It is usually thought that removal of sinks consuming valuable precursors improves the  
416 ability of a strain to produce heterologous metabolites requiring these precursors for their  
417 biosynthesis. It was therefore unexpected that the production rate (in  $\text{ng ml}^{-1} \text{ hour}^{-1}$ ) of the  
418 polyketides germicidin A and B (98), autologous to both M145 and M1152, was reduced by  
419 92% and 82% for germicidin A and B in M1152, respectively (**Figure 7**). This could be  
420 explained by the more active oxidative metabolism of M1152 compared to M145. In M1152  
421 the pool of acetyl-CoA would thus be used to feed the TCA cycle rather than be used for  
422 germicidin biosynthesis.

423 To further understand the cause of the reduced production in M1152, we also measured the  
424 production of germicidin in the intermediate strain M1146 (**Figure 7, Figure S6E**), which does  
425 not feature the *rpoB* mutation but is missing the 4 BGCs also deleted in M1152 (13). The  
426 production rate of germicidin A and B in M1146 was found to be reduced by 27% and 25%,  
427 respectively, compared to M145. This demonstrates that, while the removal of BGCs may

428 influence polyketide production, a strong reduction appears to be assignable to the *rpoB*  
429 mutation in M1152.

## 430 Discussion

431 In this work, we carried out a multi-omics study to compare the metabolic changes of  
432 *Streptomyces coelicolor* M145 and the BGC-deletion mutant M1152 during batch  
433 fermentation. The defined cultivation medium used in this work was chosen because it  
434 supports sufficient growth and a delayed, well-defined onset of secondary metabolism,  
435 necessary to study the metabolic switch (20). We aimed at defining the metabolic features  
436 differing between the two strains, both during exponential growth and stationary phase  
437 after phosphate depletion.

438 To achieve this from a systems biology perspective, we combined time-course sampled  
439 cultivation and transcriptome analysis with enzyme-constrained genome-scale models  
440 generated with proteome data. Such genome-scale models are extensively used to connect  
441 transcriptome- and proteome data to metabolic fluxes. Leveraging metabolic simulations to  
442 contextualize transcriptional changes is mainly impacted by the quality of the computational  
443 model used. Here, two teams joined efforts to improve a consensus model of *S. coelicolor*,  
444 yielding a comprehensive model useful for the scientific community.

## 445 Genome-scale models provide hypothesis for slow growth of M1152

446 The reduced growth rate of M1152 is correlated with reduced glucose uptake and enhanced  
447 glutamate uptake compared to M145. This is expected to lead to a less active glycolysis but a  
448 more active TCA cycle, and thus, a more active oxidative metabolism in M1152 compared to  
449 M145. An active oxidative metabolism is known to generate oxidative stress, and indeed, the  
450 *in vivo* data, as well as the genome-scale model, predict an increased oxidative stress in

451 M1152. The toxicity of oxidative stress might, at least in part, be responsible for the growth  
452 delay of M1152, while the *rpoB* mutation may add to this phenotype, since one of the  
453 functions of the ppGpp-associated RNA polymerase is to promote a growth arrest in  
454 conditions of nutritional stress.

#### 455 [Further development may improve M1152 as host for heterologous expression](#)

456 The strain M1152 has several advantages as a host for heterologous production of secondary  
457 metabolites. The deletion of the 4 major BGCs not only removes presumed competing sinks  
458 for valuable precursors, but also generates a clean background to ease the identification of  
459 novel products by mass spectrometry. M1152 was already proven to be more efficient than  
460 M145 and M1146 in heterologous production of the nitrogen-containing antibiotics  
461 chloramphenicol and congocidine, as well as Act production from reintroduction of its BGC  
462 (13). Strains M1146 and M1152 produce, respectively, 3- to 5-, and 20- to 40-fold more  
463 chloramphenicol and congocidine from respective heterologous clusters than M145.  
464 Furthermore, in strain M1317, derived from M1152 by additional removal of three Type III  
465 PKS genes (16), the (re-)introduction of germicidin synthase gave a 10.7 and 7.8-fold increase  
466 in the total germicidin production by M1317 and M1152, respectively. This demonstrated  
467 that the *rpoB* mutation, earlier shown to have a positive impact on the biosynthesis of  
468 secondary metabolites (13), has a higher impact on the production of these compounds than  
469 the deletion of competing precursor sinks, even while it cannot be excluded that  
470 unintended and unknown genetic differences introduced during strain development are  
471 underlying some of the observed behaviours. Nonetheless, the comparative analysis of  
472 M145 and M1152 provides valuable insight to the impact of the *rpoB* mutation on cellular  
473 metabolism and its relationships with antibiotic production, while a dedicated, systematic

474 comparative analysis of M1152, M1146 (13) and M145 will be necessary to in detail dissect  
475 the overlapping influences of BGC deletion and the *rpoB* mutation (99).

476 As earlier work has suggested a competition for common precursors (acetyl-CoA/malonyl-  
477 CoA) between fatty acids and secondary metabolites biosynthesis (100), it could be  
478 anticipated that the deletion of BGCs would have a positive effect on fatty acids, and thus  
479 TAG biosynthesis, but our data indicate that this is not the case (**Figure 5**).

480

## 481 [Materials and Methods](#)

### 482 [Sco-GEM consensus model reconstruction and development](#)

483 A brief description of the model reconstruction process is given in the following section,  
484 while all details are described in the **Supplemental Information**. and in the community  
485 model's GitHub repository (<https://github.com/SysBioChalmers/sco-GEM>). The model is  
486 hosted on GitHub to facilitate further development by the community, and we've also  
487 created a channel on Gitter dedicated to Sco-GEM questions and discussions  
488 (<https://gitter.im/SysBioChalmers/Sco-GEM>).

### 489 [Protocol for model merging](#)

490 Using iKS1317 (15) as a starting point, additional reactions, metabolites and genes were  
491 added from Sco4 (37) and iAA1259 (35). These three models are all based on the preceding  
492 model iMK1208. To facilitate model comparison, modified or added reactions and  
493 metabolites in Sco4 and iAA1259 were mapped to the iKS1317 namespace by using reaction  
494 and metabolite database annotations, reaction equations and metabolite names and

495 formulas. The full list of reactions and metabolites added or modified according to Sco4 and  
496 iAA1259 is given in **Data Set S1, Tab 6 - 10**.

497 The next step of the reconstruction process involved mainly manual curations: known flaws  
498 and missing gene annotations in iKS1317 and Sco4 were fixed; reactions and metabolites  
499 added from Sco4 were given IDs according to the BiGG namespace (56); all reactions,  
500 metabolites and genes were given SBO annotations (101) (**Data Set S1, Tab 11**); all possible  
501 reactions and metabolites were given MetaNetX (55) and chebi (54) (metabolites only)  
502 annotations; the extensive annotation of genes from iAA1259 were expanded to cover 1591  
503 of the 1777 genes in Sco-GEM. We also created pseudo-metabolites for the redox cofactors  
504 NADH/NADPH and NAD<sup>+</sup>/NADP<sup>+</sup> and introduced them into reactions where the cofactor  
505 usage is uncertain.

506 The biomass equation was curated with the following main improvements: 1) Adopting the  
507 curation of 2-demethylmenaquinol and menaquinol from iAA1259; 2) Separating the  
508 biomass reaction into the pseudometabolites lipid, protein, dna, rna, carbohydrate, cell wall  
509 and misc; 3) Updating the coefficients for prosthetic groups based on the proteomics data  
510 and information about prosthetic groups for individual proteins from UniProt. Additional  
511 details are given in the **Supplemental Information**.

512 *Model reversibility*

513 By using python-API (<https://gitlab.com/elad.noor/equilibrador-api>) of eEquilibrator (59) we  
514 calculated the change in Gibbs free energy for 770 reactions (**Data Set S1, Tab 3**).

515 eEquilibrator can only calculate the change in Gibbs free energy for intracellular reactions (i.e.  
516 not transport and exchange reactions) where all metabolites are mapped to KEGG (51, 52).

517 The calculations are based on the component contribution method (102). The change in

518 Gibbs free energy was calculated at standard conditions (25 °C, 1 bar), pH7 and 1mM  
519 concentration of reactants, denoted  $\Delta G^m$  in eQuilibrator. We then applied a threshold of -30  
520 kJ/mol to define a reaction as irreversible (103, 104). Using the set of growth data and  
521 knockout data, we evaluated the effect of these changes in reaction reversibility: by  
522 randomly applying these changes to 10 reactions at the time, we identified single, pair and  
523 triplets of reactions that reduced model accuracy when the reversibility was changed based  
524 on the change in Gibbs free energy (**Data Set S1, Tab 12; Supplemental Information**).

525 Energetic cofactors, including ATP, NADPH, NADH, FAD and any quinone, were involved in  
526 284 of the 770 reactions for which the change in Gibbs free energy was calculated. Of the  
527 114 reactions involving ATP, 82 reactions had an estimated change in Gibbs free energy  
528 between  $\pm 30$  kJ/mol, indicating that the reactions were reversible. Because one assumes  
529 that ATP-driven reactions in general are irreversible (58), the reversibility of these 82  
530 reactions were manually curated (**Data Set S1, Tab 13**). For the 7 quinone-associated  
531 reactions for which the change in Gibbs free energy was calculated (CYTBD2, NADH17b,  
532 NADH10b, MBCOA2, G3PD5, PDH3, NADH2r) all were defined as irreversible as previously  
533 suggested (58). The reversibility of reactions involving any of the other energetic cofactors  
534 were treated as any other reaction as previously described.

### 535 Analysis and annotation of transport reactions

536 Gene annotations, substrate and transport class information were mostly extracted from  
537 Transport DB 2.0 (105) and TCDB (106). Then, transport proteins were extracted from  
538 IUBMB-approved Transporter Classification (TC) System and categorized into 9 main classes  
539 (**Figure 1F**): 1) ABC transporter; 2) PTS transporter; 3) Proton symporter; 4) Sodium  
540 symporter; 5) Other symporter; 6) Proton antiport; 7) Other antiport; 8) Facilitated diffusion;  
541 9) Simple diffusion. For those transport proteins with an ambiguous substrate annotation in



542 TCDB, the specific substrate annotation was obtain by extracting annotations from KEGG (51,  
543 52), UniProt (57) or through BLAST homology search (107) using a similarity threshold of 90%  
544 **(Supplemental Information; Data Set S1, Tab 4)**.

#### 545 [Development of enzymatically constrained \(EcSco-GEM\) model](#)

546 An enzyme-constrained version of the Sco-GEM model (denoted EcSco-GEM) was generated  
547 using GECKO (31). The GECKO method enhances an existing GEM by explicitly constraining  
548 the maximum flux through each reaction by the maximum capacity of the corresponding  
549 enzyme, given by the product of the enzyme abundance and catalytic coefficient. This is  
550 facilitated by splitting both, reactions catalysed by isoenzymes and reversible reactions. The  
551 Sco-GEM v1.1 model was modified using GECKO version 1.3.4. Kinetic data, in the form of  
552  $k_{\text{cat}}$  values ( $\text{s}^{-1}$ ), were automatically collected from BRENDA (108). If BRENDA did not report a  
553  $k_{\text{cat}}$  value for an enzyme, GECKO searched for alternative  $k_{\text{cat}}$  values by reducing specificity,  
554 on the level of substrate, enzymatic activity (EC number) and organism. While 4178 out of  
555 4753 queried enzyme activities could be matched to the full EC code, 306 of the matched  
556 activities reported in BRENDA were from *S. coelicolor*. Additionally, six  $k_{\text{cat}}$  values were  
557 manually curated, and a thorough explanation and reasoning behind these modifications are  
558 given in the **Supplemental Information**. The NAD(H)/NAD(P)H pseudo-reactions were  
559 blocked to avoid infeasible loops.

560 Then, separate models were created for each strain (the gene clusters for actinorhodin,  
561 undecylprodigiosin, CDA and coelimycin P1 were removed to create M1152) and for each  
562 time point by using estimated growth, uptake rates of glutamate and glucose, secretion  
563 rates of undecylprodigiosin, germicidin A and B and proteome measurements (**Supplemental**  
564 **Information**). These time point specific models (9 time points for M145, 8 time points for

565 M1152) were used to analyse the activity in individual metabolic pathways through random  
566 sampling (65). We also created one EcSco-GEM model for each strain with a global  
567 constraint on the protein usage instead of specific protein usage, which were used for model  
568 quality control.

#### 569 [Continuous integration and quality control with memote](#)

570 Validation and quality assessment of Sco-GEM is carried out using the test-suite in memote  
571 (42). Memote provides by default a large range of tests, which we have used to identify  
572 issues and possible improvements. The test suite reports descriptive model statistics such as  
573 the number of genes, reactions and metabolites, and also checks the presence of SBO terms  
574 and annotations, the charge and mass balance of all reactions, the network topology and  
575 find energy-generating cycles (109). Additionally, we incorporated custom tests into the  
576 memote test-suite to automatically compare predicted phenotypes with experimental data  
577 in different growth media and for different knockout mutants. The experimental growth and  
578 knockout data are extracted from (15). Memote version 0.9.12 was used in this work, and  
579 the full memote report for Sco-GEM is given in the **Supplemental Information**. As a separate  
580 evaluation, we applied the method for identifying internal and unrealistic energy-generating  
581 cycles by (110) , and no such cycles were found in Sco-GEM.

582 The simplest use of memote is generating snapshot reports showing the current state of the  
583 model. However, by integrating Travis CI [<https://travis-ci.com/>] into the gitHub repository,  
584 memote can be used to create a continuous report displaying how each commit affects the  
585 model quality.

## 586 Random sampling, normalization and pathway analysis

587 Because of the huge number of reactions in the EcSco-GEM, it is challenging to sample the  
588 solution space appropriately: we have chosen to use the method provided in the Raven  
589 Toolbox 2 (37, 65), which samples the vertices of the solution space. The drawback of this  
590 method is that it will not result in a uniform sampling of the solution space. However, it is  
591 more likely to span the entire solution space and also not prone to get stuck in extremely  
592 narrow parts of the solution space, which may happen with variants of the hit-and-run  
593 algorithm (111–113). For each of the time points for each strain (17 different conditions in  
594 total) we constrained exchange reactions between 99% and 101% of the measured rates and  
595 generated 5000 random flux distributions with Gurobi as the solver. The reactions catalysed  
596 by isoenzymes were combined into the set of reactions in Sco-GEM and the reactions  
597 providing protein for each reaction. The mean of the 5000 flux distributions for each  
598 metabolic reaction was used in the following analysis.

599 Finally, for each of the 17 conditions, the mean fluxes were normalized by the CO<sub>2</sub>  
600 production rate. Then, the normalized mean fluxes were summarized for each metabolic  
601 pathway by using the curated pathway annotations, and we consider this a measure of the  
602 metabolic activity in each pathway.

603 Since glucose and glutamate uptake rates, as well as growth rates were significantly different  
604 in the two strains and at different time points, normalization of the data was necessary to  
605 compare flux distributions. We tested various proxies as indicators of overall metabolic  
606 activity for normalization, namely CO<sub>2</sub> production; the total carbon uptake from glucose and  
607 glutamate; growth rate and mean flux value. As golden standard, we compared the fluxes  
608 through individual reactions that are well documented to change in M145 in response to the

609 phosphate depletion (**Figure S8**). Normalization based on CO<sub>2</sub> production was tested and  
610 gave similar results than the data normalized on total carbon uptake from glucose and  
611 glutamate (**Figure S8A and S8B**). The data normalized by the sum of fluxes showed similar  
612 patterns as those achieved by glucose/glutamate and CO<sub>2</sub>-normalized data but was noisier  
613 (**Figure S8C**). Considering the huge differences in growth rate, the growth-normalized data  
614 masked any other flux patterns (**Figure S8D**). The fact that different normalizations provided  
615 similar differences in metabolic fluxes proved that the inferred changes in metabolism were  
616 not artefacts of the normalization method but represent true metabolic activity of each  
617 strain.

618 [Strains, cultivation conditions, sampling procedures, and analyses of media](#)  
619 [components and antibiotics box](#)

620 Experiments were performed using strain M145 of *S. coelicolor* A3(2) and its derivatives  
621 M1146 and M1152. The latter two are lacking the 4 major BGCs for actinorhodin (Act),  
622 undecylprodigiosin (Red), coelimycin P1 (Cpk), and calcium-dependent antibiotic (CDA),  
623 while M1152 is also carrying the pleiotropic, previously described antibiotic production  
624 enhancing mutation *rpoB* [S433L] (13, 22). All strains were kindly provided by Mervyn Bibb at  
625 John-Innes-Centre, Norwich, UK.

626 Triplicate cultivations of the strains were performed based on germinated spore inoculum  
627 on 1.8 L phosphate-limited medium SSBM-P, applying all routines of the optimized  
628 submerged batch fermentation strategy for *S. coelicolor* established and described before  
629 (20). All media were based on ion-free water, and all chemicals used were of analytical  
630 grade. In brief, spore batches of M145, M1146 and M1152 were generated by cultivation on  
631 soy flour-mannitol (SFM) agar plates (114), harvesting by scraping off spores and suspension

632 in 20% (v/v) glycerol, and storage in aliquots at  $-80^{\circ}\text{C}$ .  $10^9$  CFU of spores of each strain were  
633 germinated for 5 hours at  $30^{\circ}\text{C}$  and 250 rpm in 250 mL baffled shake-flasks with 2 g of 3 mm  
634 glass beads and 50 mL 2x YT medium (115). The germinated spores were harvested by  
635 centrifugation ( $3200 \times g$ ,  $15^{\circ}\text{C}$ , 5 min) and re-suspended in 5 mL ion-free water. An even  
636 dispersion of the germinated spores was achieved by vortex mixing (30 s), ensuring  
637 comparable inocula among biological replicas. Each bioreactor (1.8 liter starting volume  
638 culture medium in a 3-liter Applikon stirred tank reactor) was inoculated with 4.5 mL  
639 germinated spore suspension (corresponding to  $9 \times 10^8$  CFU). Phosphate-limited medium  
640 SSBM-P (8) consisted of Na-glutamate, 55.2 g/L; D-glucose, 40 g/L;  $\text{MgSO}_4$ , 2.0 mM;  
641 phosphate, 4.6 mM; supplemented minimal medium trace element solution SMM-TE (115),  
642 8 mL/L and TMS1, 5.6 mL/L. TMS1 consisted of  $\text{FeSO}_4 \times 7 \text{H}_2\text{O}$ , 5 g/L;  $\text{CuSO}_4 \times 5 \text{H}_2\text{O}$ , 390  
643 mg/L;  $\text{ZnSO}_4 \times 7 \text{H}_2\text{O}$ , 440 mg/L;  $\text{MnSO}_4 \times \text{H}_2\text{O}$ , 150 mg/L;  $\text{Na}_2\text{MoO}_4 \times 2 \text{H}_2\text{O}$ , 10 mg/L;  $\text{CoCl}_2 \times$   
644  $6 \text{H}_2\text{O}$ , 20 mg/L, and HCl, 50 mL/L. Clerol FBA 622 fermentation defoamer (Diamond  
645 Shamrock Scandinavia) was added to the growth medium before inoculation. Throughout  
646 fermentations, pH 7.0 was maintained constant by automatic addition of 2 M HCl. Dissolved  
647 oxygen levels were maintained at a minimum of 50% by automatic adjustment of the stirrer  
648 speed (minimal agitation 325 rpm). The aeration rate was constant 0.5 L/(L x min) sterile air.  
649 Dissolved oxygen, agitation speed and carbon dioxide evolution rate were measured and  
650 logged on-line, while samples for the determination of cell dry weight, levels of growth  
651 medium components and secondary metabolites concentrations, as well as for  
652 transcriptome and proteome analysis were withdrawn throughout the fermentation trials as  
653 indicated in **Figure 2B**. For transcriptome analysis,  $3 \times 4$  ml culture sample were applied in  
654 parallel onto three  $0.45 \mu\text{m}$  nitrocellulose filters (Millipore) connected to vacuum. The  
655 biomass on each filter was immediately washed twice with 4 ml double-autoclaved ion-free

656 water pre-heated to 30 °C, before the filters were collected in a 50 ml plastic tube, frozen in  
657 liquid nitrogen and stored at -80 °C until RNA isolation. For proteome analysis, 5 ml samples  
658 were taken and centrifuged (3200 x g, 5 min, 4 °C), and the resulting cell pellets frozen  
659 rapidly at -80 °C until further processing.

660 Levels of phosphate were measured spectrophotometrically by using the SpectroQuant  
661 Phosphate test kit (Merck KGaA, Darmstadt, Germany) following the manufacturer's  
662 instructions after downscaling to 96-well plate format. D-glucose and L-glutamate  
663 concentrations were determined by LC-MS using suitable standards, and measured  
664 concentrations were used to estimate specific uptake and excretion rates.

665 Undecylprodigiosin (Red) levels were determined spectrophotometrically at 530 nm after  
666 acidified methanol extraction from the mycelium (116). To determine relative amounts of  
667 actinorhodins (determined as total blue pigments, TBP), cell culture samples were treated  
668 with KOH (final concentration 1 M) and centrifuged, and the absorbance of the supernatants  
669 at 640 nm was determined (116). Quantification of germicidin A and B was performed using  
670 targeted LC-MS analytics.

## 671 [Proteomics](#)

### 672 [Sample preparation and NanoUPLC-MS analysis](#)

673 Quantitative proteomics were performed using pipeline previously described (117).  
674 Mycelium pellets for proteome analysis were thawed and resuspended in the remaining  
675 liquid. 50 µL re-suspended mycelium was withdrawn and pelleted by centrifugation. 100 µL  
676 lysis buffer (4% SDS, 100 mM Tris-HCl pH 7.6, 50 mM EDTA) was added, and samples were  
677 sonicated in a water bath sonicator (Biorupter Plus, Diagenode) for 5 cycles of 30 s high  
678 power and 30 s off in ice water. Cell debris was pelleted and removed by centrifugation.

679 Total protein was precipitated using the chloroform-methanol method described before  
680 (118). The pellet was dried in a vacuum centrifuge before dissolving in 0.1% RapiGest SF  
681 surfactant (Waters) at 95 °C. The protein concentration was measured at this stage using  
682 BCA method. Protein samples were then reduced by adding 5 mM DTT, followed by  
683 alkylation using 21.6 mM iodoacetamide. Then trypsin (recombinant, proteomics grade,  
684 Roche) was added at 0.1 µg per 10 µg protein. Samples were digested at 37 °C overnight.  
685 After digestion, trifluoroacetic acid was added to 0.5% followed by incubation at 37 °C for 30  
686 min and centrifugation to remove MS interfering part of RapiGest SF. Peptide solution  
687 containing 8 µg peptide was then cleaned and desalted using STAGE-Tipping technique  
688 (119). Final peptide concentration was adjusted to 40 ng/µL using sample solution (3%  
689 acetonitrile, 0.5% formic acid) for analysis.

690 200 ng (5 µL) digested peptide was injected and analysed by reversed-phase liquid  
691 chromatography on a nanoAcquity UPLC system (Waters) equipped with HSS-T3 C18 1.8 µm,  
692 75 µm X 250 mm column (Waters). A gradient from 1% to 40% acetonitrile in 110 min  
693 (ending with a brief regeneration step to 90% for 3 min) was applied. [Glu<sup>1</sup>]-fibrinopeptide B  
694 was used as lock mass compound and sampled every 30 s. Online MS/MS analysis was done  
695 using Synapt G2-Si HDMS mass spectrometer (Waters) with an UDMS<sup>E</sup> method set up as  
696 described in (120).

#### 697 Data processing and label-free quantification

698 Raw data from all samples were first analysed using the vendor software ProteinLynx Global  
699 SERVER (PLGS) version 3.0.3. Generally, mass spectrum data were generated using an MS<sup>E</sup>  
700 processing parameter with charge 2 lock mass 785.8426, and default energy thresholds. For  
701 protein identification, default workflow parameters except an additional acetyl in N-terminal

702 variable modification were used. Reference protein database was downloaded from  
703 GenBank with the accession number NC\_003888.3. The resulted dataset was imported to  
704 ISOQuant version 1.8 (120) for label-free quantification. Default high identification  
705 parameters were used in the quantification process. TOP3 result was converted to PPM  
706 (protein weight) and send to the modelers and others involved in interpreting the data (**Data**  
707 **Set S1, Tab 14**).

708 TOP3 quantification was filtered to remove identifications meet these two criteria: 1.  
709 identified in lower than 70% of samples of each strain and 2. sum of TOP3 value less than  $1 \times$   
710  $10^5$ . Cleaned quantification data was further subjected to DESeq2 package version 1.22.2  
711 (29) and PCA was conducted after variance stabilizing transformation (vst) of normalized  
712 data.

## 713 [Transcriptomics](#)

### 714 RNA extraction and quality control

715 Bacteria were lysed using RNAprotect Bacteria (Qiagen) and following the manufacturer's  
716 instruction. Briefly, filters containing bacteria were incubated with 4 ml of RNAprotect  
717 Bacteria reagent. After centrifugation, resulting samples were lysed using 500  $\mu$ l of TE buffer  
718 (10 mM Tris-Cl, 1 mM EDTA, pH 8.0) containing 15 mg/ml lysozyme using 150-600  $\mu$ m  
719 diameter glass beads (Sigma) agitated at 30 Hz for 5 minutes in the TissueLyser II (Qiagen).  
720 Total RNA was extracted using RNeasy mini kit (Qiagen) and 700  $\mu$ l of the resulting lysate  
721 complemented with 470  $\mu$ l of absolute ethanol. RNAase-free DNase set (Qiagen) and  
722 centrifugation steps were performed to prevent DNA and ethanol contamination. Elution  
723 was performed using 30  $\mu$ l of RNase-free water and by reloading the eluate on the column to  
724 improve the RNA yield. The RNA concentration was measured using Qubit RNA BR Assay Kit



725 (ThermoFisher Scientific), RNA purity was assessed using A260/A280 and A260/A230 ratio  
726 using the Nano Drop ND-1000 Spectrophotometer (PEQLAB). RNA Integrity Number was  
727 estimated using RNA 6000 Nano Kit (Agilent) and the Bioanalyzer 2100 (Agilent).

#### 728 Library preparation and sequencing

729 A total of 1 µg of total RNA was subjected to rRNA depletion using Ribo-Zero rRNA Removal  
730 Kit Bacteria (Illumina). The cDNA libraries were constructed using the resulting tRNA and the  
731 NEBNext Ultra II Directional RNA Library Prep Kit (NEB). Libraries were sequenced as single-  
732 reads (75 bp read length) on an Illumina NextSeq500 platform at a depth of 8–10 million  
733 reads each.

#### 734 RNA-seq data assessment and analysis

735 Sequencing statistics including the quality per base and adapter content assessment of  
736 resulting transcriptome sequencing data were conducted with FastQC v0.11.5 (121). All  
737 reads mappings were performed against the reference strain of *Streptomyces coelicolor*  
738 A3(2) (RefSeq ID NC\_003888.3). The mappings of all samples were conducted with HISAT2  
739 v2.1.0 (122). As parameters, spliced alignment of reads was disabled, and strand-specific  
740 information was set to reverse complemented (HISAT2 parameter --no-spliced-alignment  
741 and --rna-strandness "R"). The resulting mapping files in SAM format were converted to BAM  
742 format using SAMtools v1.6 (123). Mapping statistics, including strand specificity estimation,  
743 percentage of mapped reads and fraction exonic region coverage, were conducted with the  
744 RNA-seq module of QualiMap2 v2.2.2-dev (124). Gene counts for all samples were  
745 computed with featureCounts v1.6.0 (28) based on the annotation of the respective  
746 reference genome, where the selected feature type was set to transcript records  
747 (featureCounts parameter -t transcript).

748 Normalization and differential gene expression

749 Raw count files were imported into Mayday SeaSight (125) for common, time-series-wide  
750 normalization. For this, the raw counts of all biological replicates of one strain across the  
751 time-series were log<sub>2</sub>-transformed (with pseudocount of +1 for the genes with zero counts)  
752 and then quantile-normalized. To make the two normalized time-series data of M154 and  
753 M1152 comparable, they were again quantile-normalized against each other. The  
754 normalized RNA-seq data are provided in **Data Set S1, Tab 15**.

755 Differentially expressed genes were identified by ANOVA using Orange (v3.2) and the  
756 bioinformatic toolkit (v), with FDR of <0.01 and a minimal fold enrichment >1 for at least one  
757 aligned time point. Genes with low expression (log<sub>2</sub> < 5 for both strains and time points)  
758 were not considered for further analysis. The differentially expressed genes were  
759 subsequently scaled to the expression average and clustered by K-means. Visualization of  
760 genes and clusters were performed in python (v3.7) with matplotlib (v3.1.1). For this, the  
761 time-series of M145 and M1152 were aligned such that in the visual representation, the  
762 expression profiles of the two strains are aligned relative to the time point of phosphate  
763 depletion. Both DAVID (126, 127) and the string database (128) was used to evaluate the  
764 function of each cluster, identifying overrepresentation of function groups based on GO  
765 annotation or text mining. Identified differential clusters or regulons were extracted from  
766 literature and plotted (**Data Set S1, Tab 5; Figure S7**).

767

## 768 Data and Software Availability

769 Model repository

770 The model is hosted and developed in an open repository on GitHub:

771 <https://github.com/SysBioChalmers/Sco-GEM>. Here, the latest version of the Sco-GEM is

772 available in both YAML and SBML level 3 Version 1. Additionally, users can see all details of

773 the model reconstruction and contribute to further model development by posting issues or

774 suggest changes. This should encourage further, incremental development of Sco-GEM by

775 the community.

776 Proteome data

777 The proteomics data have been deposited to the ProteomeXchange Consortium via the

778 PRIDE (129) partner repository with the dataset identifier PXD013178 and

779 10.6019/PXD013178. Normalized proteome data is also available in **Data Set S1, Tab 14**.

780 Transcriptomics data

781 All high-throughput sequencing data have been deposited in NCBI's Gene Expression

782 Omnibus and are accessible under accession number GSE132487 (M145) and GSE132488

783 (M1152). Normalized counts are also found in **Data Set S1, Tab 15**.

## 784 Author contributions

785 Conceptualization, E.K., E.A., A.W., S.S., A.S.Y. and T.K. Methodology and software, E.K., S.S.,

786 A.S.Y. and T.K. Validation and formal analysis, C.D., K.N., D.V.D., S.S., T.K., E.K. Investigation,

787 T.K., A.W., S.S., E.K. Data curation, S.S., T.K. Writing - original draft, S.S., T.K., D.V.D., C.D.,

788 K.N. Writing – review & editing, all authors. Visualization, S.S., E.K., C.D., D.V.D. Supervision,

789 A.W., E.A., E.K., G.W. Project administration, A.W. Funding acquisition: A.W., E.K., E.A., G.W.

## 790 Acknowledgements

791 The authors would like to acknowledge Bogdan I. Florea of Leiden University, Leiden,  
792 Netherlands, for running and monitoring the proteome measurements, and the bio-organic  
793 synthesis group at Leiden University for providing the opportunity to use their  
794 instrumentation. The authors would also like to acknowledge co-workers at SINTEF Industry,  
795 Trondheim, Norway: Ingemar Nærdal, Anna Lewin and Kari Hjelen for running the batch  
796 fermentations and Anna Nordborg, Janne Beate Øiaas and Tone Haugen for performing  
797 offline analyses and the germicidin analytics. The RNA-Seq sequencing was carried out by  
798 c.ATG, Tübingen, Germany.

799 This study was conducted in the frame of ERA-net for Applied Systems Biology (ERA-SysAPP)  
800 project SYSTERACT and the project INBioPharm of the Centre for Digital Live Norway  
801 (Research Council of Norway grant no. 248885), with additional support of SINTEF internal  
802 funding. The authors declare no conflict of interest.

803 Figures

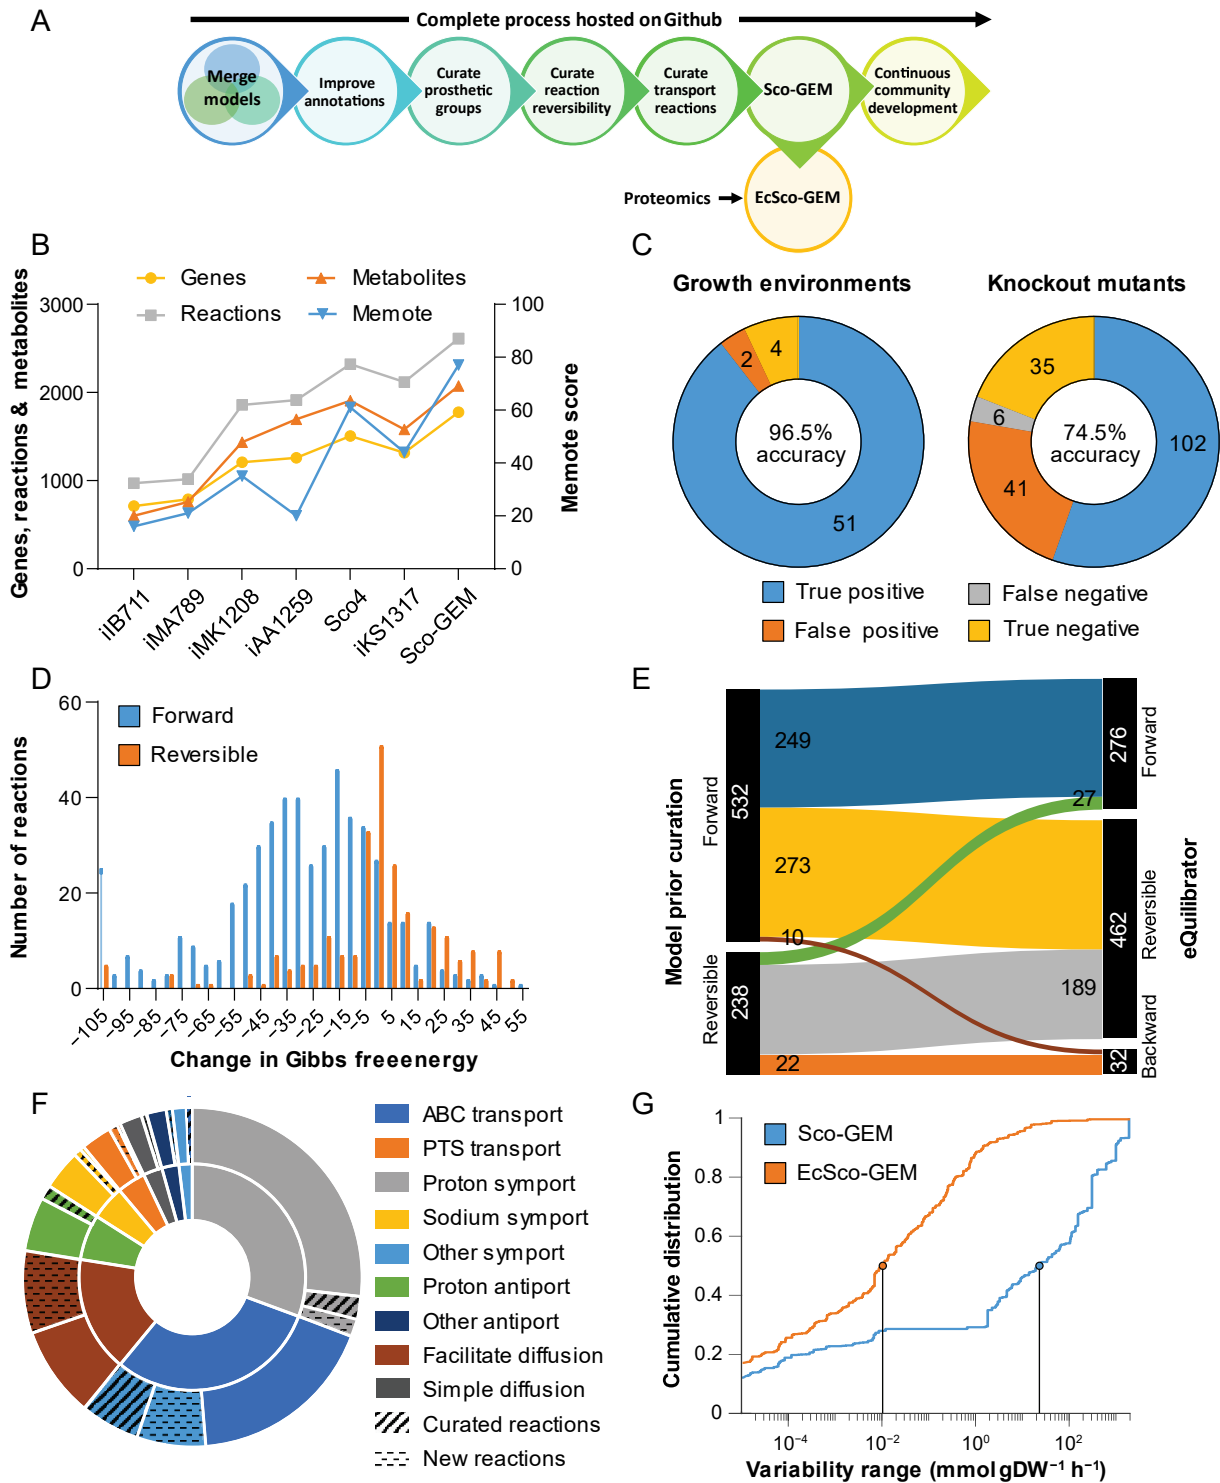

804

805 **Figure 1: Sco-GEM development and analysis.** A) Schematic overview of the various steps in  
 806 the Sco-GEM reconstruction process. B) The overall memote score and number of genes,  
 807 reactions and metabolites for the 7 published *S. coelicolor* GEMs. C) Assessment of the model

808 quality by comparing *in vivo* observations with *in silico* predictions across in total 241 tests:  
809 accuracy = 0.80; sensitivity = 0.96; specificity = 0.48; Matthews Correlation Coefficient = 0.53.  
810 D) The change in Gibbs free energy for 770 reactions that were annotated as either reversible  
811 or forward irreversible in the model prior curation of reaction reversibility. The histogram is  
812 truncated at -105 kJ/mol, and more negative values are assigned to the leftmost bin. E)  
813 Analysis and comparison of the directionality and reversibility of reactions prior curation and  
814 the direction inferred from the change in Gibbs free energy as estimated by eQuilibrator. F)  
815 Overview of the 369 transport reactions included in Sco-GEM, whereof 42 were curated and  
816 65 added during this work. The inner ring categorizes the reactions into 9 different subgroups,  
817 while the outer ring displays the amount of curated and added reactions within each category.  
818 G) Comparison of cumulative flux variability distributions, demonstrating that the  
819 incorporation of kinetic coefficients in EcSco-GEM greatly constrains the solution space.  
820

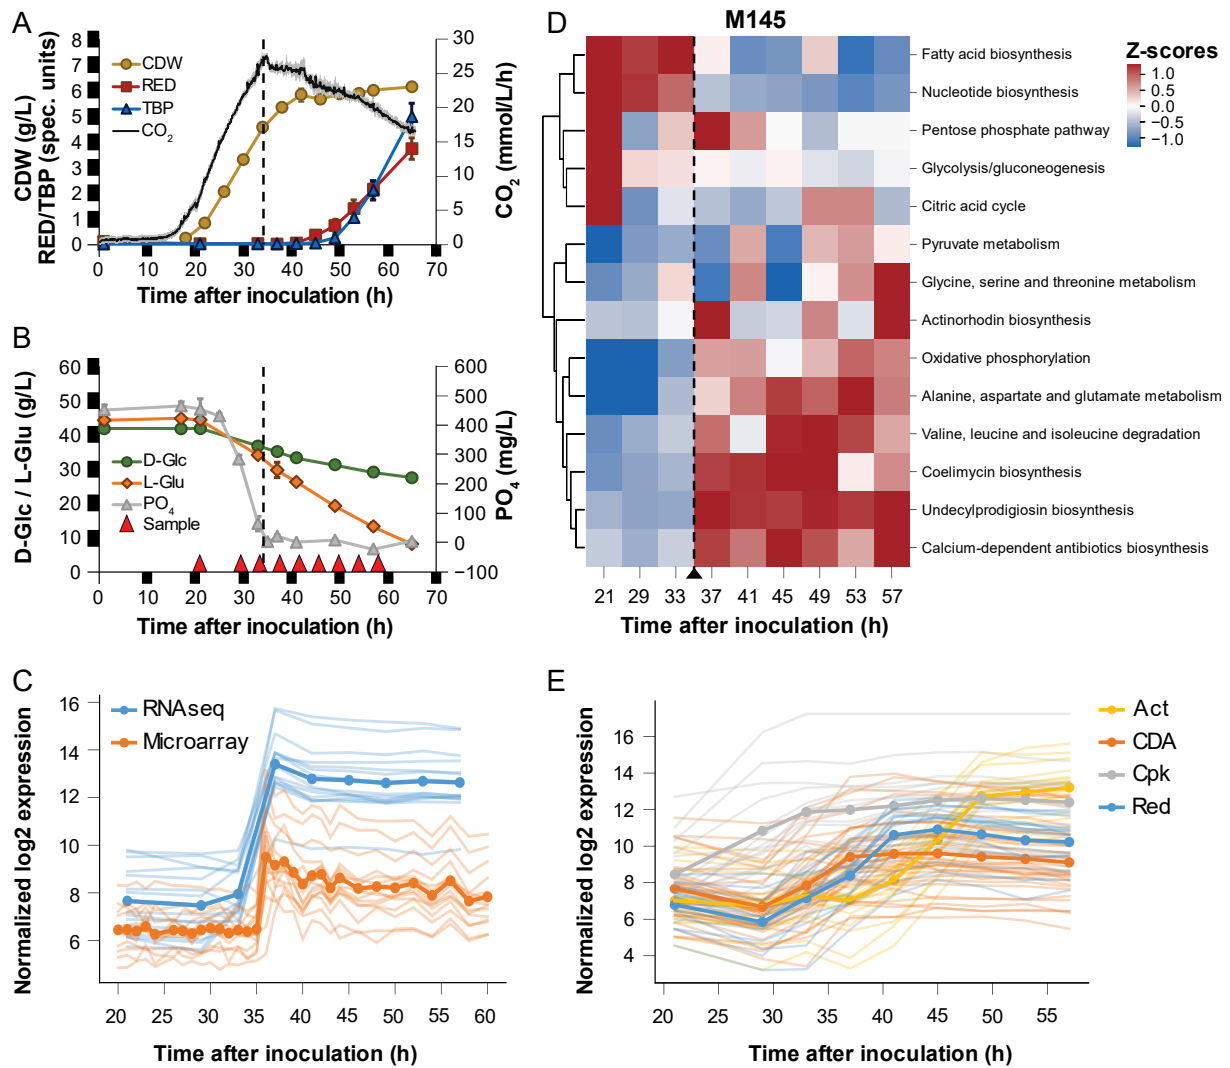

821

822 **Figure 2: Batch cultivation of *S. coelicolor* M145 and the effect of phosphate depletion.**

823 Compounds produced (A) and consumed (B) during batch fermentation of *S. coelicolor* M145.

824 Time points for sampling for transcriptome and proteome analysis are indicated with red

825 triangles. The dashed vertical line indicates when phosphate in the medium has been

826 depleted. Error bars are standard deviations of three biological replicates. CDW, Cell Dry

827 Weight; Red, undecylprodigiosin; TBP, Total Blue Pigments/actinorhodins; CO<sub>2</sub> volume

828 corrected respiration; D-Glc, D-glucose; L-Glu, L-glutamate; PO<sub>4</sub>, phosphate. C) Comparison of

829 previously published microarray data (8) and RNA-seq data (this study) for genes previously

830 found to respond to phosphate depletion (8). D) Clustered heatmap of CO<sub>2</sub>-normalized Z-

831 scores for each of the top 10 varying pathways plus the pathways for the 4 major BGCs in

832 M145, as revealed by simulations with the proteomics-integrated EcSco-GEM model. The  
 833 dashed vertical line indicates the time point of the metabolic switch. E) RNA-seq data of the 4  
 834 major BGCs show the onset of biosynthesis of actinorhodin (Act), calcium-dependent  
 835 antibiotic (CDA), coelimycin P1 (Cpk) and undecylprodigiosin (Red) at different time points  
 836 during the batch fermentations of M145.  
 837

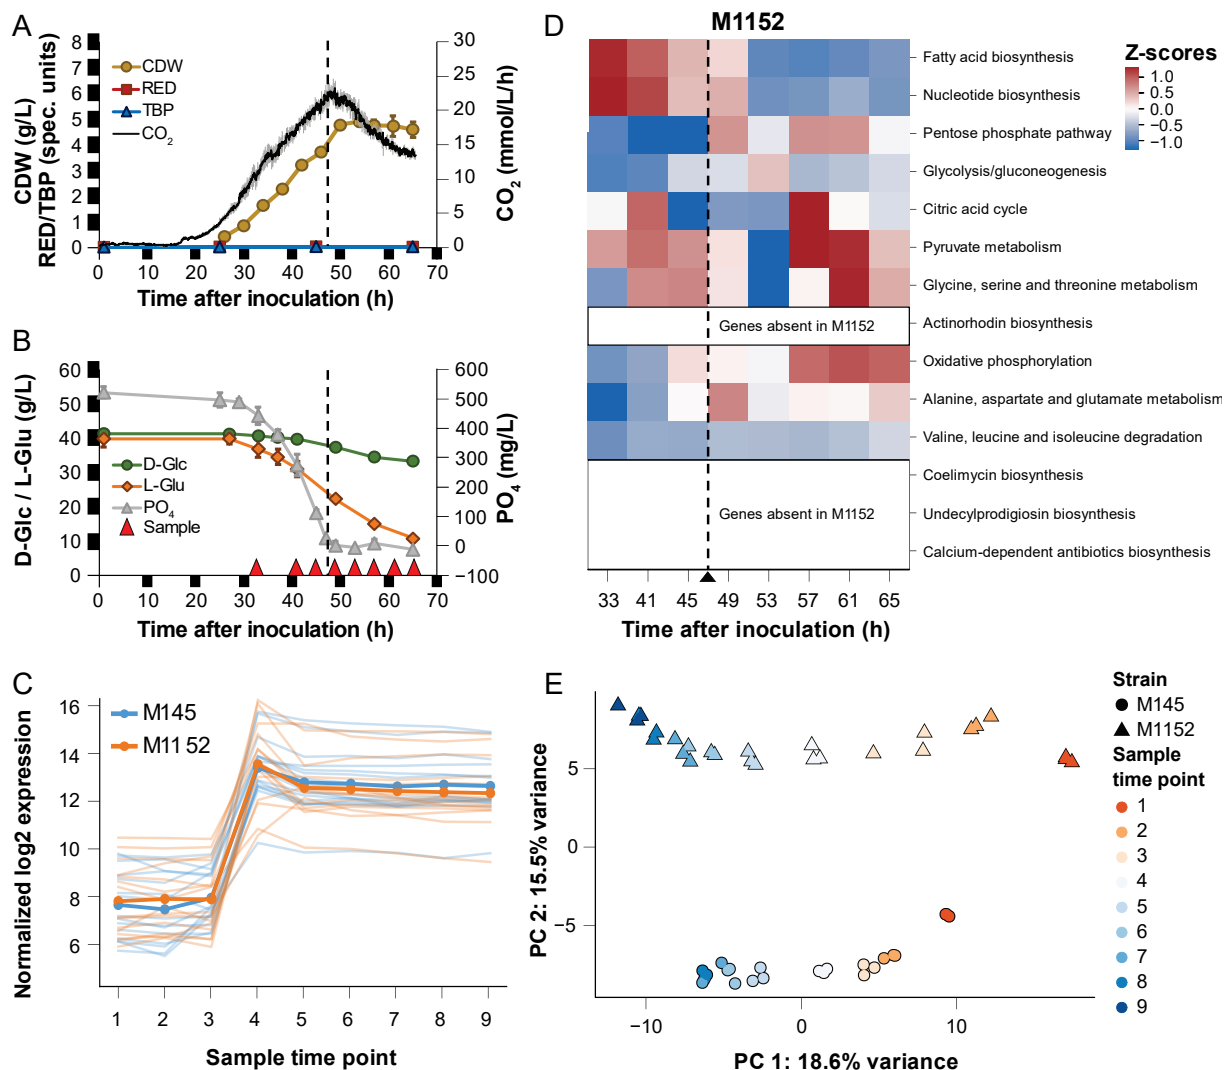

838

839 **Figure 3: Batch cultivation of *S. coelicolor* M1152.** Compounds produced (A) and consumed  
 840 (B) during batch fermentation of *S. coelicolor* M1152. Time points for sampling for  
 841 transcriptome and proteome analysis are indicated with red triangles. The dashed vertical line



842 indicates when phosphate in the medium has been depleted. Error bars are standard  
843 deviations of three biological replicates. CDW, Cell Dry Weight; Red, undecylprodigiosin; TBP,  
844 Total Blue Pigments/actinorhodins; CO<sub>2</sub>, volume corrected respiration; D-Glc, D-glucose; L-  
845 Glu, L-glutamate; PO<sub>4</sub>, phosphate. C) Alignment of sample time points of M145 and M1152  
846 cultivations based on the expression profiles of genes that were earlier found to respond to  
847 phosphate depletion in respect to the metabolic switch (8). D) Clustered heatmap of  
848 proteomics data for M145 (triangles) and M1152 (circles), for each time-point and culture.  
849 The first principal component separates the time points, while the second principal  
850 component separates the two strains. E) CO<sub>2</sub>-normalized Z-scores of pathway fluxes predicted  
851 by EcSco-GEM for 10 of the most varying pathways in M145 and M1152. The data for M145  
852 (**Figure 2D**) and M1152 are standardized together to make values and colours comparable. E)  
853 Principle component analysis of the proteomics data for M145 (triangles) and M1152 (circles),  
854 for each time-point and culture. The first principal component separates the time points while  
855 the second principal component separates the two strains.

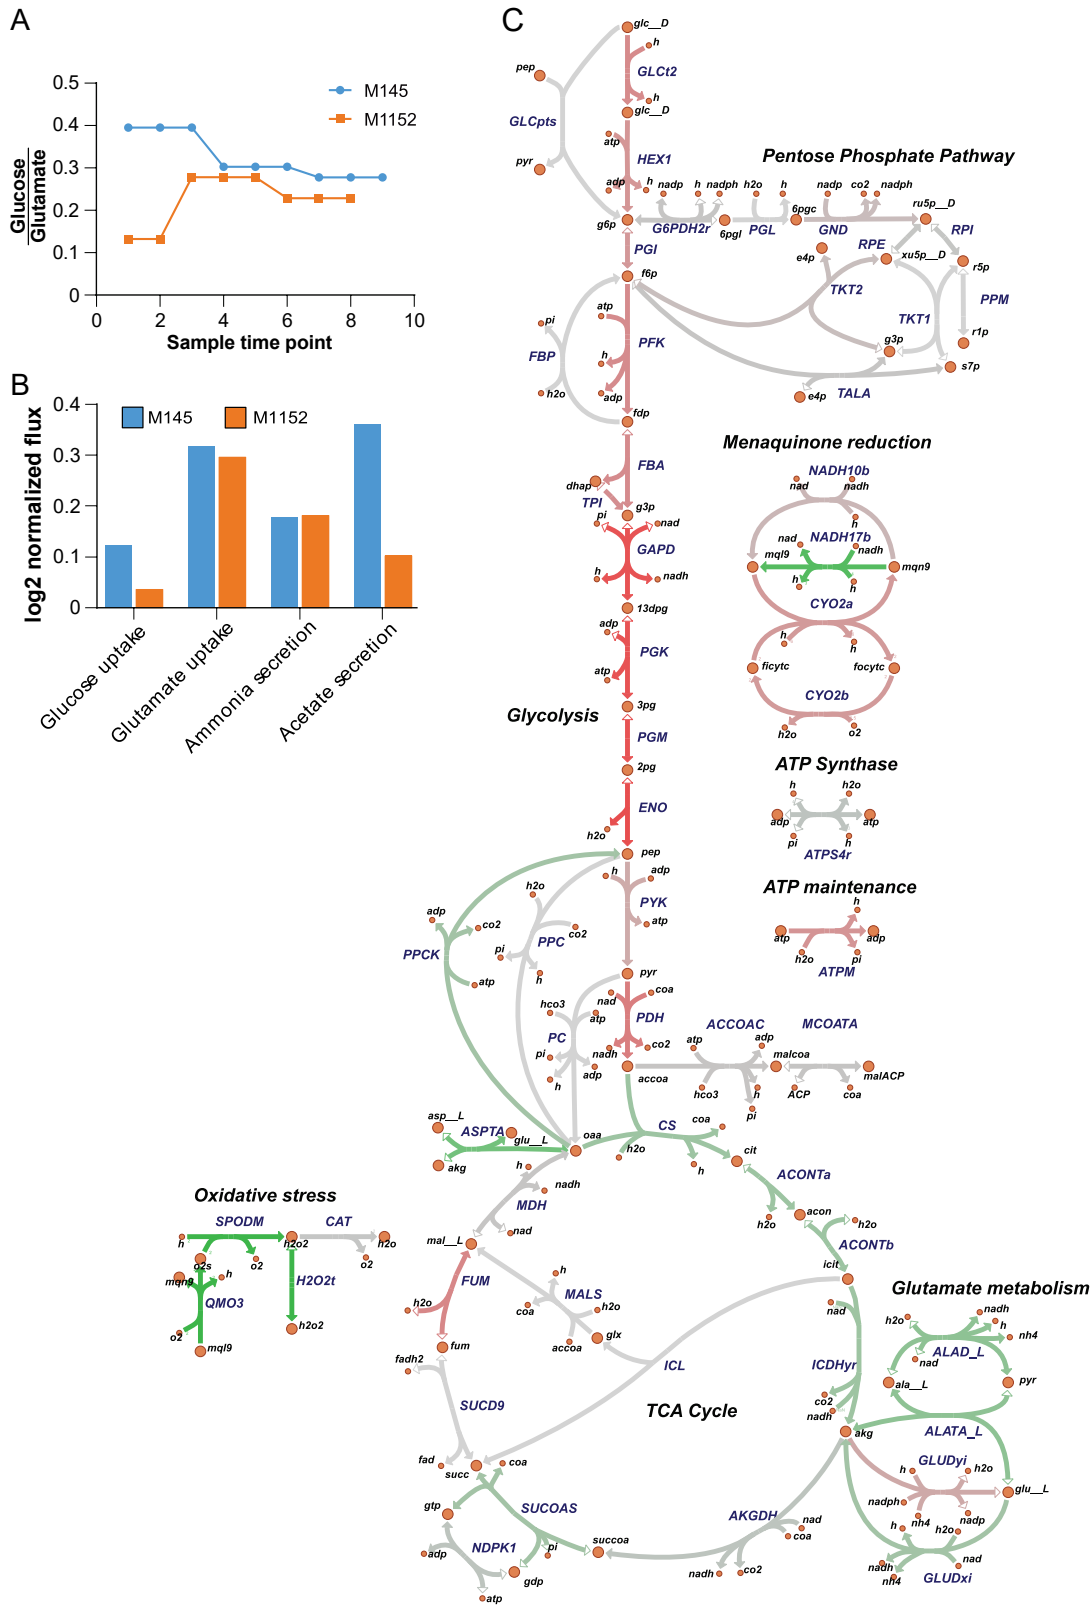

856

857 **Figure 4: Predicted carbon fluxes in M145 and M1152.** A) The ratio between estimated uptake  
 858 rates of glucose and glutamate showing that M1152 acquires a smaller part of its carbon from  
 859 glucose compared to M145. B) Roughly half of the nitrogen from glutamate is excreted as

860 ammonium (both strains), while higher uptake of glucose in M145 leads to more excretion of  
861 acetate. C) Comparison of predicted fluxes for the second sampling time points for M145 and  
862 M1152, i.e. after 29 and 41 hours, respectively. The second time point for each strain was  
863 chosen because the estimated uptake rates are more reliable than the first time point. The  
864 strength of the colour of the lines correspond to the flux difference between the strains; green  
865 reactions have higher flux in M1152, and red reactions have higher flux in M145. Note the  
866 reduced biomass-specific uptake rate of glucose and increased oxidative stress in M1152.  
867

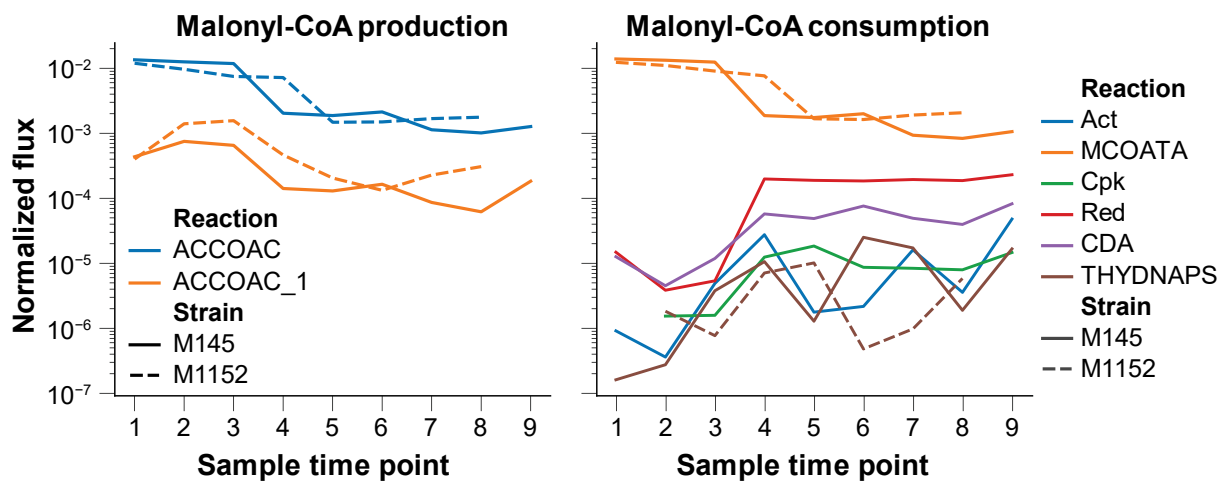

868

869 **Figure 5: Production and consumption of malonyl-CoA as the branching point between fatty**  
870 **acid biosynthesis and production of polyketides.** From EcSco-GEM predictions, a reduced  
871 malonyl-CoA production (left panel) by both acetyl-CoA carboxylase (ACCOAT; blue) and  
872 acetyl-CoA carboxytransferase (ACCOAT\_1; orange) is observed in both strains. Most of the  
873 malonyl-CoA is consumed by fatty acid biosynthesis through malonyl-CoA-ACP transacylase  
874 (MCOATA), even after metabolic switching, and this consumption balances the malonyl-CoA  
875 production. The other main sinks for malonylmalonyl-CoA are the pathways encoded by the 4  
876 major BGCs (Act, Cpk, Red and CDA) in addition to biflavin synthase (THYDNAPS).

877

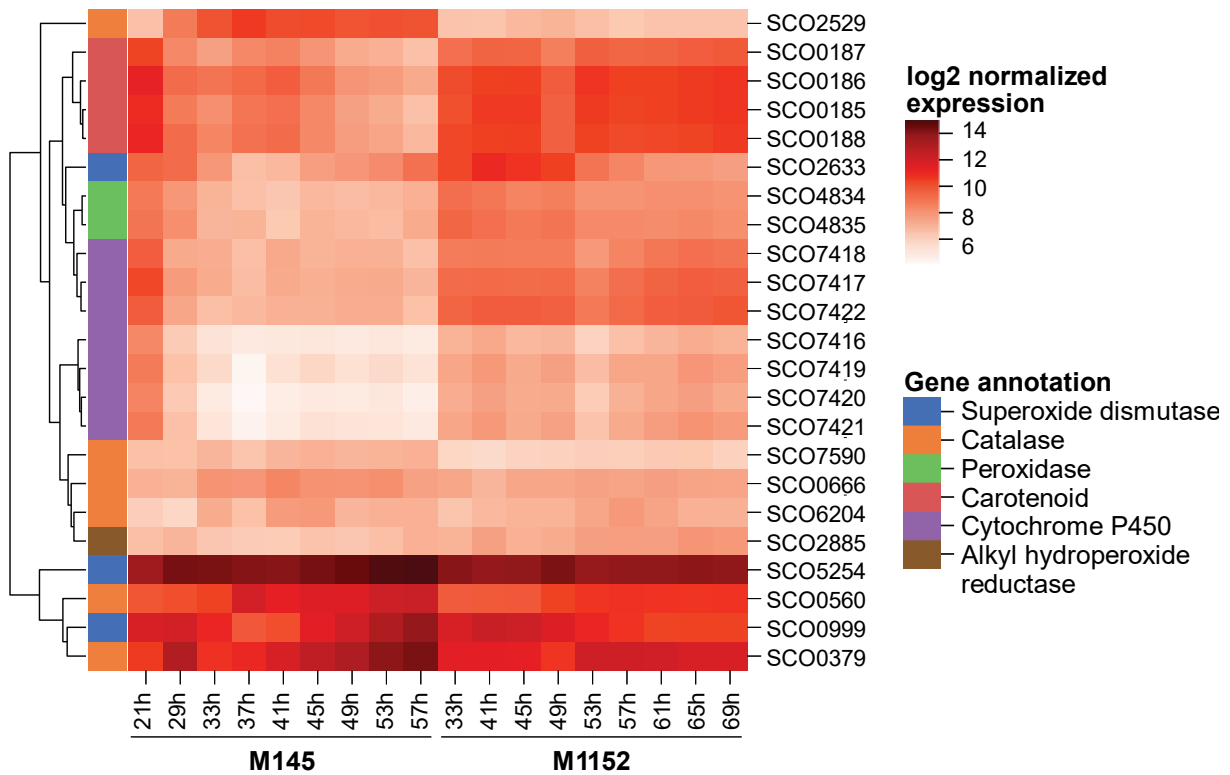

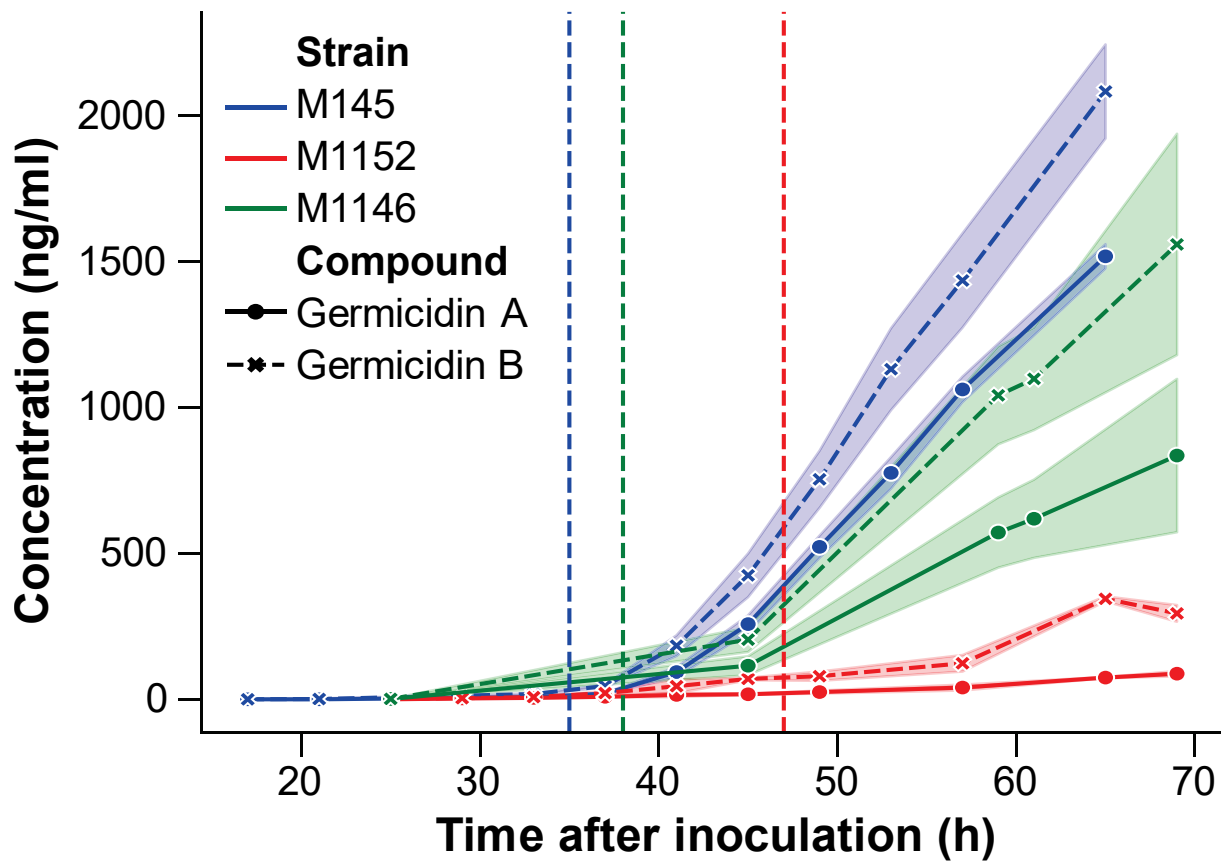

884

885 **Figure 7: Concentrations of germicidin A and B produced by M145, M1146 and M1152.** The  
886 shaded regions display the uncertainty range ( $\pm 1$  standard deviation) based on three replicate  
887 cultivations. Germicidin production rates after the metabolic switch (in  $\text{ng ml}^{-1} \text{ hour}^{-1}$ ) are:  
888 41.4 (A) and 75.5 (B) for M145; 30.2 (A) and 56.4 (B) for M1146; 3.3 (A) and 13.3 (B) for M1152.  
889 Note that the growth rate is different between the strains, displayed by the vertical lines  
890 representing phosphate depletion at 35, 38 and 47 hours for M145, M1146 and M1152,  
891 respectively.

## 892 Supplemental Figures

893 **Figure S1: Reaction subsystems and origin.** The number of reactions in Sco-GEM in each of  
894 the 15 subsystems, and from which model they originate from. The other reactions (orange)  
895 are added during reconstruction of Sco-GEM.

896 **Figure S2: Gene clusters associated with metabolic switch.** RNA-seq (left column) and  
897 proteomics (right column) from M145 of the 8 gene clusters associated with the metabolic  
898 switch as previously identified (8). The 8 clusters are: A) genes related to ribosomal proteins;  
899 B) genes related to nitrogen metabolism; C) Cpk gene cluster; D) genes related to  
900 development; E) genes upregulated in response to phosphate depletion; F) genes involved in  
901 synthesis of phosphate-free polymers; G) Act gene cluster; H) Red gene cluster

902 **Figure S3: Log-transformed expression levels of genes related to nitrogen metabolism.** The  
903 glutamate import (SCO5774-5777), the glutamate sensing system *gluR-gluK* (SCO5778 and  
904 SCO57779), *glnR* (SCO4159) and *glnA* (SCO2198) are downregulated subsequent to phosphate  
905 depletion. We also observe that the first time point in M145 is very different from all other  
906 samples.

907 **Figure S4: Clustered heatmaps of Z-score based on CO<sub>2</sub>-normalized sum of fluxes of all**  
908 **pathways standardized within each pathway and separated into different subsystems /**  
909 **parts of the metabolism.** A) Central carbon metabolism. B) Amino acid metabolism. C)  
910 Metabolism of vitamins and cofactors. D) Pathways of Biosynthetic gene clusters. E) Lipid  
911 metabolism. F) Oxidative stress. G) Degradation of toxic compounds. H) All other pathways.  
912 For all panels only pathway with a minimum flux of  $1e-8 \text{ mmol (g DW)}^{-1} \text{ h}^{-1}$  were included.

913 **Figure S5: RNA-seq, proteome and flux prediction of specific gene clusters and reactions.** A)  
914 EcSco-GEM predicts that the flux through citrate synthase (CS) and isocitrate dehydrogenase  
915 (ICDHyr) increases at later time points in M145, effectively increasing the shuttling of acetyl-  
916 CoA into the TCA cycle. B) Log<sub>2</sub> normalized expression data of genes involved in oxidative  
917 phosphorylation indicate an increasing expression at later time points, while overall  
918 expression in M1152 is higher than in M145. C-H) Comparison of log<sub>2</sub> normalized expression

919 data as calculated with  $(\log_2 M145) - \log_2(M1152)$ , where positive values indicate upregulation  
920 in M145 relative to M1152, and vice versa for negative values. C) Increased expression of  
921 genes of the *afsR* regulon in M145, while no significant difference in expression is observed  
922 for (D) *scbR* regulon; (E) *adpA* regulon; (F) *argR* regulon; (G) genes induced by ppGPP; and (H)  
923 genes repressed by ppGpp.

924 **Figure S6: Analysis of transcriptome data of genes.** A) Unsupervised clustering (k-means) of  
925 significantly changed genes into 7 clusters: the first three (clusters 1-3) are upregulated in  
926 M1152, while the last four (clusters 4-7) are upregulated from the beginning or at later time  
927 points in M145. B-D) Comparison of  $\log_2$  normalized expression data as calculated with  $(\log_2$   
928  $M145) - \log_2(M1152)$ , where positive values indicate upregulation in M145 relative to M1152,  
929 and vice versa for negative values. B) Genes in the *SoxR* regulon are reducing expression in  
930 M1152 at later time points. C) Almost all genes in the ATP-synthase cluster are up-regulated  
931 in M1152 after the first time point. D) Also, the transcription of ribosomal protein genes after  
932 the metabolic switch is increased in M1152 compared to M145. E) Batch cultivation of *S.*  
933 *coelicolor* M1146. Error bars are standard deviations of three biological replicates. CDW, Cell  
934 Dry Weight; CO<sub>2</sub> volume corrected respiration; PO<sub>4</sub>, phosphate.

935 **Figure S7: Gene Ontology enrichment analysis of the 7 clusters identified in the 499**  
936 **differentially expressed genes, categorized by function into four clustered heatmaps.**

937 Each heatmap shows the p-value for the enrichment of each GO-process. A) Genes related to  
938 reactive oxygen species, the ribosome or development process and cell wall formation. B)  
939 Oxireductase and iron / metal ion homeostasis. C) Regulation, biosynthesis and metabolism  
940 related to RNA and DNA. D) All other GO-annotations. E) This color palette is the legend for  
941 the column colors on top of each heatmap which displays which of the seven clusters each

942 gene belongs to. The red palette covers cluster 1-3 (upregulated in M1152), while the blue  
943 palette covers cluster 4-7 (upregulated in M145). Note that no GO-processes were enriched  
944 for the genes in cluster 2.

945 **Figure S8: Comparison of normalization methods of randomly sampled fluxes.** Heatmap  
946 showing mean flux values normalized by A) total carbon uptake from glucose and glutamate,  
947 B) CO<sub>2</sub> production, C) sum of all fluxes and D) growth rate. Because the mean flux values in  
948 these reactions are different by several orders of magnitude, we display the data as  
949 standardized values (for each reaction).

950

951 Other Supplemental material

952 **Supplemental Information:** The Memote report of Sco-GEM, the protocols for Sco-GEM and  
953 EcSco-GEM development and a detailed description of estimation of rates from batch  
954 fermentation data.

955 **Data Set S1**

956 **Tab 1:** Detailed overview of the script performing the reconstruction of Sco-GEM.

957 **Tab 2:** Comparison of the new biomass reaction in Sco-GEM with the biomass reaction in  
958 iAA1259.

959 **Tab 3:** Reversibility prior update, calculated change in Gibbs free energy and standard  
960 deviation of the calculated change in Gibbs free energy of 770 reactions in Sco-GEM.

961 **Tab 4:** Overview of all transport reactions added or curated during the process of Sco-GEM  
962 model development, and the metabolites added along with the new transport reactions.



963 **Tab 5:** Genes present in the 7 clusters identified with K-Means clustering of the  
964 differentially expressed genes.

965 **Tab 6:** Sco4 ID, name and Sco-GEM ID of the reactions added from Sco4 to Sco-GEM.

966 **Tab 7:** Sco4 ID, name and Sco-GEM ID of the metabolites added from Sco4 to Sco-GEM

967 **Tab 8:** Reaction ID, name and gene annotation of reactions added from iAA1259 to Sco-  
968 GEM.

969 **Tab 9:** List of reactions modified according to iAA1259.

970 **Tab 10:** Metabolite ID and name of metabolites added from Sco4 to Sco-GEM.

971 **Tab 11:** List of SBO terms used in Sco-GEM

972 **Tab 12:** Single, pair and triplets of reactions which reduced model accuracy, in total 56  
973 different reactions. The reversibility of these reactions was not changed according to the  
974 predicted change in Gibbs free energy.

975 **Tab 13:** Manual curation of the reversibility of the 82 reactions involving ATP predicted to  
976 be reversible by eQuilibrator.

977 **Tab 14:** Normalized proteome data for M145 and M1152. M145 is cultivated in F516-F518,  
978 while M1152 is cultivated in F519, F521, F522. Re-index IDs corresponds to the strain,  
979 fermentation-number (F516-F522), a unique number describing the experiment, and a  
980 numbering of the time points from 1 to 9 (P1-P9). I.e. the Re-indexed ID M145\_F516\_P2  
981 represents the second timepoint of fermentation 516 with the strain M145. In the original  
982 IDs (row below) the P-number represents time after inoculation (in hours).

983 **Tab 15:** Normalized RNA-seq data for all six fermenters. M145 is cultivated in F516-F518,  
984 while M1152 is cultivated in F519, F521, F522. Re-index IDs corresponds to the strain,  
985 fermentation-number (F516-F522), a unique number describing the experiment, and a  
986 numbering of the time points from 1 to 9 (P1-P9). I.e. the Re-indexed ID M145\_F516\_P2  
987 represents the second timepoint of fermentation 516 with the strain M145. In the original  
988 IDs (row below) the P-number represents time after inoculation (in hours).

989 **Tab 16:** List of genes within each cluster known to be associated with the metabolic switch.

990

991

## 992 [References](#)

- 993 1. Hopwood, David A. 2007. *Streptomyces in nature and medicine: the antibiotic makers*.  
994 Oxford University Press, USA.
- 995 2. Hahn J-S, Oh S-Y, Roe J-H. 2002. Role of OxyR as a Peroxide-Sensing Positive Regulator  
996 in *Streptomyces coelicolor* A3(2). *Journal of Bacteriology* 184:5214–5222.
- 997 3. Hutchings MI, Hoskisson PA, Chandra G, Buttner MJ. 2004. Sensing and responding to  
998 diverse extracellular signals? Analysis of the sensor kinases and response regulators of  
999 *Streptomyces coelicolor* A3(2). *Microbiology*, 150:2795–2806.
- 1000 4. Nothaft H, Rigali S, Boomsma B, Swiatek M, McDowall KJ, van Wezel GP, Titgemeyer F.  
1001 2010. The permease gene nagE2 is the key to N-acetylglucosamine sensing and  
1002 utilization in *Streptomyces coelicolor* and is subject to multi-level control. *Molecular*  
1003 *Microbiology* 75:1133–1144.

- 1004 5. Rigali S, Titgemeyer F, Barends S, Mulder S, Thomae AW, Hopwood DA, van Wezel GP.  
1005 2008. Feast or famine: the global regulator DasR links nutrient stress to antibiotic  
1006 production by *Streptomyces*. *EMBO reports* 9:670–675.
- 1007 6. Sola-Landa A, Rodríguez-García A, Franco-Domínguez E, Martín JF. 2005. Binding of  
1008 PhoP to promoters of phosphate-regulated genes in *Streptomyces coelicolor*:  
1009 identification of PHO boxes. *Molecular Microbiology* 56:1373–1385.
- 1010 7. Chandra G, Chater KF. 2014. Developmental biology of *Streptomyces* from the  
1011 perspective of 100 actinobacterial genome sequences. *FEMS Microbiol Rev* 38:345–  
1012 379.
- 1013 8. Nieselt K, Battke F, Herbig A, Bruheim P, Wentzel A, Jakobsen ØM, Sletta H, Alam MT,  
1014 Merlo ME, Moore J, Omara WA, Morrissey ER, Juarez-Hermosillo MA, Rodríguez-García  
1015 A, Nentwich M, Thomas L, Iqbal M, Legaie R, Gaze WH, Challis GL, Jansen RC, Dijkhuizen  
1016 L, Rand DA, Wild DL, Bonin M, Reuther J, Wohlleben W, Smith MC, Burroughs NJ, Martín  
1017 JF, Hodgson DA, Takano E, Breitling R, Ellingsen TE, Wellington EM, Kolter R, Siegele D,  
1018 Tormo A, Hesketh A, Bucca G, Laing E, Flett F, Hotchkiss G, Smith C, Chater K, Hesketh  
1019 A, Chen W, Ryding J, Chang S, Bibb M, Huang J, Lih C, Pan K, Cohen S, Lian W, Jayapal K,  
1020 Charaniya S, Mehra S, Glod F, Kyung Y, Sherman D, Hu W, Strauch E, Takano E, Baylis H,  
1021 Bibb M, DeRisi J, Iyer V, Brown P, Reuther J, Wohlleben W, Fink D, Weissschuh N,  
1022 Reuther J, Wohlleben W, Engels A, Tiffert Y, Supra P, Wurm R, Wohlleben W, Wagner R,  
1023 Reuther J, Pawlik K, Kotowska M, Chater K, Kuczek K, Takano E, Takano E, Chakraborty  
1024 R, Nihira T, Yamada Y, Bibb M, Takano E, Kinoshita H, Mersinias V, Bucca G, Hotchkiss  
1025 G, Nihira T, Smith C, Bibb M, Wohlleben W, Chater K, Kotowska M, Pawlik K, Smulczyk-  
1026 Krawczynszyn A, Bartosz-Bechowski H, Kuczek K, Claessen D, Rink R, Jong W de, Siebring

- 1027 J, Vreugd P de, Boersma F, Dijkhuizen L, Wosten H, Bibb M, Molle V, Buttner M, Ryding  
1028 N, Kelemen G, Whatling C, Flardh K, Buttner M, Chater K, Ohnishi Y, Seo J, Horinouchi  
1029 S, Sola-Landa A, Moura R, Martín J, Sola-Landa A, Rodríguez-García A, Franco-  
1030 Domínguez E, Martín J, Rodríguez-García A, Barreiro C, Santos-Beneit F, Sola-Landa A,  
1031 Martín J, Sola-Landa A, Rodríguez-García A, Apel A, Martín J, Feitelson J, Malpartida F,  
1032 Hopwood D, Hallam S, Malpartida F, Hopwood D, Takano E, Gramajo H, Strauch E,  
1033 Andres N, White J, Bibb M, Kieser T, Bibb M, Buttner M, Chater K, Hopwood D, Bystrykh  
1034 L, Fernandez-Moreno M, Herrema J, Malpartida F, Hopwood D, Dijkhuizen L, Irizarry R,  
1035 Bolstad B, Collin F, Cope L, Hobbs B, Speed T, Ihaka R, Gentleman R, Dietzsch J,  
1036 Gehlenborg N, Nieselt K. 2010. The dynamic architecture of the metabolic switch in  
1037 *Streptomyces coelicolor*. *BMC Genomics* 11:10.
- 1038 9. Thomas L, Hodgson DA, Wentzel A, Nieselt K, Ellingsen TE, Moore J, Morrissey ER, Legaie  
1039 R, STREAM Consortium TS, Wohlleben W, Rodríguez-García A, Martín JF, Burroughs NJ,  
1040 Wellington EMH, Smith MCM. 2012. Metabolic switches and adaptations deduced from  
1041 the proteomes of *Streptomyces coelicolor* wild type and *phoP* mutant grown in batch  
1042 culture. *Molecular & cellular proteomics* : MCP 11:M111.013797.
- 1043 10. Bentley SD, Chater KF, Cerdeño-Tárraga A-MA-M, Challis GL, Thomson NR, James KD,  
1044 Harris DE, Quail MA, Kieser H, Harper D, Bateman A, Brown S, Chandra G, Chen CW,  
1045 Collins M, Cronin A, Fraser A, Goble A, Hidalgo J, Hornsby T, Howarth S, Huang C-HC-H,  
1046 Kieser T, Larke L, Murphy L, Oliver K, O'Neil S, Rabinowitsch E, Rajandream MM-A,  
1047 Rutherford K, Rutter S, Seeger K, Saunders D, Sharp S, Squares R, Squares S, Taylor K,  
1048 Warren T, Wietzorrek A, Woodward J, Barrell BG, Parkhill J, Hopwood DA. 2002.

- 1049 Complete genome sequence of the model actinomycete *Streptomyces coelicolor* A3(2).  
1050 Nature 417:141–147.
- 1051 11. Gomez-Escribano JP, Song L, Fox DJ, Yeo V, Bibb MJ, Challis GL. 2012. Structure and  
1052 biosynthesis of the unusual polyketide alkaloid coelimycin P1, a metabolic product of  
1053 the cpk gene cluster of *Streptomyces coelicolor* M145. Chem Sci 3:2716–2720.
- 1054 12. Castro JF, Razmilic V, Gomez-Escribano JP, Andrews B, Asenjo JA, Bibb MJ. 2015.  
1055 Identification and Heterologous Expression of the Chaxamycin Biosynthesis Gene  
1056 Cluster from *Streptomyces leeuwenhoekii*. Appl Environ Microbiol 81:5820–5831.
- 1057 13. Gomez-Escribano JP, Bibb MJ. 2011. Engineering *Streptomyces coelicolor* for  
1058 heterologous expression of secondary metabolite gene clusters. Microbial  
1059 Biotechnology 4:207–215.
- 1060 14. Gomez-Escribano JP, Bibb MJ. 2014. Heterologous expression of natural product  
1061 biosynthetic gene clusters in *Streptomyces coelicolor*: from genome mining to  
1062 manipulation of biosynthetic pathways. Journal of Industrial Microbiology &  
1063 Biotechnology 41:425–431.
- 1064 15. Kumelj T, Sulheim S, Wentzel A, Almaas E. 2018. Predicting Strain Engineering Strategies  
1065 Using iKS1317: A Genome-Scale Metabolic Model of *Streptomyces coelicolor*.  
1066 Biotechnology Journal 0:1800180.
- 1067 16. Thanapipatsiri A, Claesen J, Gomez-Escribano J-P, Bibb M, Thamchaipenet A. 2015. A  
1068 *Streptomyces coelicolor* host for the heterologous expression of Type III polyketide  
1069 synthase genes. Microb Cell Fact 14.

- 1070 17. Yin J, Hoffmann M, Bian X, Tu Q, Yan F, Xia L, Ding X, Francis Stewart A, Müller R, Fu J,  
1071 Zhang Y. 2015. Direct cloning and heterologous expression of the salinomycin  
1072 biosynthetic gene cluster from *Streptomyces albus* DSM41398 in *Streptomyces*  
1073 *coelicolor* A3(2). *Scientific Reports* 5:15081.
- 1074 18. Nepal KK, Wang G. 2019. *Streptomyces*: Surrogate hosts for the genetic manipulation  
1075 of biosynthetic gene clusters and production of natural products. *Biotechnology*  
1076 *Advances* 37:1–20.
- 1077 19. Rutledge PJ, Challis GL. 2015. Discovery of microbial natural products by activation of  
1078 silent biosynthetic gene clusters. *Nature Reviews Microbiology* 13:509–523.
- 1079 20. Wentzel A, Bruheim P, Øverby A, Jakobsen ØM, Sletta H, Omara WAM, Hodgson DA,  
1080 Ellingsen TE, Hopwood D, Bentley S, Chater K, Cerdeno-Tarraga A, Challis G, Thomson  
1081 N, James K, Harris D, Quail M, Kieser H, Harper D, Klieneberger-Nobel E, Chater K,  
1082 Hopwood D, Chater K, Bibb M, Lakey J, Lea E, Rudd B, Wright H, Hopwood D, Wright L,  
1083 Hopwood D, Feitelson J, Hopwood D, Bibb M, Rokem J, Lantz S, Eliasson A, Nielsen J,  
1084 Song S, Jeong Y, Kim P, Chun G, Rosa J, Neto AB, Hokka C, Badino A, Kieser T, Bibb M,  
1085 Buttner M, Chater K, Hopwood D, Hayes A, Hobbs G, Smith C, Oliver S, Butler P, Evans  
1086 C, Herbet D, Tempest D, Takano E, Gramajo H, Strauch E, Andres N, White J, Bibb M,  
1087 Bruheim P, Sletta H, Bibb M, White J, Levine D, Hodgson D, Nieselt K, Battke F, Herbig  
1088 A, Bruheim P, Wentzel A, Jakobsen O, Sletta H, Alam M, Merlo M, Moore J, Alam M,  
1089 Merlo M, Hodgson D, Wellington E, Takano E, Breitling R, Battke F, Symons S, Nieselt K,  
1090 Battke F, Herbig A, Wentzel A, Jakobsen O, Bonin M, Hodgson D, Wohlleben W, Ellingsen  
1091 T, Nieselt K, Thomas L, Hodgson D, Wentzel A, Nieselt K, Ellingsen T, Moore J, Morrissey  
1092 E, Legaie R, Wohlleben W, Rodriguez-Garcia A, Wentzel A, Sletta H, Consortium S,

- 1093 Ellingsen T, Bruheim P, Waldvogel E, Herbig A, Battke F, Amin R, Nentwich M, Nieselt K,  
1094 Ellingsen T, Wentzel A, Hodgson D, Wohlleben W, Mast Y, Claessen D, Rink R, Jong W  
1095 de, Siebring J, Vreugd P de, Boersma F, Dijkhuizen L, Wosten H, Bystrykh L, Fernandez-  
1096 Moreno M, Herrema J, Malpartida F, Hopwood D, Dijkhuizen L, Villas-Boas S, Delicado  
1097 D, Akesson M, Nielsen J, Christensen B, Nielsen J, Strauch E, Takano E, Baylis H, Bibb M,  
1098 Martin J, Martin J, Demain A, Coisne S, Béchet M, Blondeau R, Gesheva V, Ivanova V,  
1099 Gesheva R, Nakamura T, Yoshimoto A, Rollins M, Jensen S, Westlake D, Gorst-Allman C,  
1100 Rudd B, Chang C-J, Floss H, Wasserman H, Shaw C, Sykes R, Cushley R, Bruheim P, Butler  
1101 M, Ellingsen T, Jonsbu E, Christensen B, Nielsen J, Gunnarsson N, Bruheim P, Nielsen J,  
1102 Rodriguez-Garcia A, Sola-Landa A, Apel K, Santos-Beneit F, Martin J, Santos-Beneit F,  
1103 Rodriguez-Garcia A, Sola-Landa A, Martin J, Lambert R, Stratford M, Surowitz K, Pfister  
1104 R. 2012. Optimized submerged batch fermentation strategy for systems scale studies of  
1105 metabolic switching in *Streptomyces coelicolor* A3(2). *BMC Systems Biology* 6:59.
- 1106 21. Wentzel A, Sletta H, Consortium S, Ellingsen TE, Bruheim P. 2012. Intracellular  
1107 Metabolite Pool Changes in Response to Nutrient Depletion Induced Metabolic  
1108 Switching in *Streptomyces coelicolor*. *Metabolites* 2:178–194.
- 1109 22. Hu H, Zhang Q, Ochi K. 2002. Activation of Antibiotic Biosynthesis by Specified  
1110 Mutations in the *rpoB* Gene (Encoding the RNA Polymerase  $\beta$  Subunit) of *Streptomyces*  
1111 *lividans*. *Journal of Bacteriology* 184:3984–3991.
- 1112 23. Braesel J, Tran TA, Eustáquio AS. 2019. Heterologous expression of the diazaquinomycin  
1113 biosynthetic gene cluster. *J Ind Microbiol Biotechnol*.

- 1114 24. Kepplinger B, Morton-Laing S, Seistrup KH, Marrs ECL, Hopkins AP, Perry JD, Strahl H,  
1115 Hall MJ, Errington J, Allenby NEE. 2018. Mode of Action and Heterologous Expression of  
1116 the Natural Product Antibiotic Vancoresmycin. *ACS Chem Biol* 13:207–214.
- 1117 25. Li T, Du Y, Cui Q, Zhang J, Zhu W, Hong K, Li W. 2013. Cloning, Characterization and  
1118 Heterologous Expression of the Indolocarbazole Biosynthetic Gene Cluster from  
1119 Marine-Derived *Streptomyces sanyensis* FMA. *Marine Drugs* 11:466–488.
- 1120 26. Battke F, Symons S, Nieselt K. 2010. Mayday--integrative analytics for expression data.  
1121 *BMC Bioinformatics* 11:121.
- 1122 27. Jäger G, Battke F, Nieselt K. 2011. TIALA — Time series alignment analysis, p. 55–61. *In*  
1123 2011 IEEE Symposium on Biological Data Visualization (BioVis).
- 1124 28. Liao Y, Smyth GK, Shi W. 2014. featureCounts: an efficient general purpose program for  
1125 assigning sequence reads to genomic features. *Bioinformatics* 30:923–930.
- 1126 29. Love MI, Huber W, Anders S. 2014. Moderated estimation of fold change and dispersion  
1127 for RNA-seq data with DESeq2. *Genome Biol* 15:550.
- 1128 30. Mi H, Muruganujan A, Ebert D, Huang X, Thomas PD. 2019. PANTHER version 14: more  
1129 genomes, a new PANTHER GO-slim and improvements in enrichment analysis tools.  
1130 *Nucleic Acids Res* 47:D419–D426.
- 1131 31. Sánchez BJ, Zhang C, Nilsson A, Lahtvee P-J, Kerkhoven EJ, Nielsen J. 2017. Improving  
1132 the phenotype predictions of a yeast genome-scale metabolic model by incorporating  
1133 enzymatic constraints. *Molecular Systems Biology* 13:935.



- 1134 32. Robinson JL, Nielsen J. 2016. Integrative analysis of human omics data using  
1135 biomolecular networks. *Mol Biosyst* 12:2953–2964.
- 1136 33. Borodina I, Krabben P, Nielsen J. 2005. Genome-scale analysis of *Streptomyces*  
1137 *coelicolor* A3(2) metabolism. *Genome research* 15:820–9.
- 1138 34. Alam MT, Merlo ME, (stream) TSC, Hodgson DA, Wellington EM, Takano E, Breitling R.  
1139 2010. Metabolic modeling and analysis of the metabolic switch in *Streptomyces*  
1140 *coelicolor*. *BMC Genomics* 11:202.
- 1141 35. Amara A, Takano E, Breitling R. 2018. Development and validation of an updated  
1142 computational model of *Streptomyces coelicolor* primary and secondary metabolism.  
1143 *BMC Genomics* 19:519.
- 1144 36. Kim MW, Sang Yi J, Kim J-NNJ-NNJ, Kim J-NNJ-NNJ, Kim MW, Kim B-GG. 2014.  
1145 Reconstruction of a high-quality metabolic model enables the identification of gene  
1146 overexpression targets for enhanced antibiotic production in *streptomyces coelicolor*  
1147 A3(2). *Biotechnology Journal* 9:1185–1194.
- 1148 37. Wang H, Marcišauskas S, Sánchez BJ, Domenzain I, Hermansson D, Agren R, Nielsen J,  
1149 Kerkhoven EJ. 2018. RAVEN 2.0: A versatile toolbox for metabolic network  
1150 reconstruction and a case study on *Streptomyces coelicolor*. *PLOS Computational*  
1151 *Biology* 14:e1006541.
- 1152 38. Mohite OS, Weber T, Kim HU, Lee SY. 2019. Genome-Scale Metabolic Reconstruction of  
1153 Actinomycetes for Antibiotics Production. *Biotechnology Journal* 14:1800377.

- 1154 39. Toro L, Pinilla L, Avignone-Rossa C, Ríos-Esteba R. 2018. An enhanced genome-scale  
1155 metabolic reconstruction of *Streptomyces clavuligerus* identifies novel strain  
1156 improvement strategies. *Bioprocess Biosyst Eng* 41:657–669.
- 1157 40. Licona-Cassani C, Marcellin E, Quek L-E, Jacob S, Nielsen LK. 2012. Reconstruction of the  
1158 *Saccharopolyspora erythraea* genome-scale model and its use for enhancing  
1159 erythromycin production. *Antonie van Leeuwenhoek* 102:493–502.
- 1160 41. Valverde JR, Gullón S, Mellado RP. 2018. Modelling the metabolism of protein secretion  
1161 through the Tat route in *Streptomyces lividans*. *BMC Microbiology* 18:59.
- 1162 42. Lieven C, Beber ME, Olivier BG, Bergmann FT, Ataman M, Babaei P, Bartell JA, Blank LM,  
1163 Chauhan S, Correia K, Diener C, Dräger A, Ebert BE, Edirisinghe JN, Faria JP, Feist A,  
1164 Fengos G, Fleming RMT, Garcia-Jimenez B, Hatzimanikatis V, Helvoirt W van, Henry C,  
1165 Hermjakob H, Herrgard MJ, Kim HU, King Z, Koehorst JJ, Klamt S, Klipp E, Lakshmanan  
1166 M, Novere NL, Lee D-Y, Lee SY, Lee S, Lewis NE, Ma H, Machado D, Mahadevan R, Maia  
1167 P, Mardinoglu A, Medlock GL, Monk J, Nielsen J, Nielsen LK, Nogales J, Nookaew I,  
1168 Resendis O, Palsson B, Papin JA, Patil KR, Poolman M, Price ND, Richelle A, Rocha I,  
1169 Sanchez B, Schaap P, Sherif RSM, Shoaie S, Sonnenschein N, Teusink B, Vilaca P, Vik JO,  
1170 Wodke JA, Xavier JC, Yuan Q, Zakhartsev M, Zhang C. 2018. Memote: A community-  
1171 driven effort towards a standardized genome-scale metabolic model test suite. *bioRxiv*  
1172 350991.
- 1173 43. Thiele I, Swainston N, Fleming RMT, Hoppe A, Sahoo S, Aurich MK, Haraldsdottir H, Mo  
1174 ML, Rolfsson O, Stobbe MD, Thorleifsson SG, Agren R, Bölling C, Bordel S, Chavali AK,  
1175 Dobson P, Dunn WB, Endler L, Hala D, Hucka M, Hull D, Jameson D, Jamshidi N, Jonsson

- 1176 JJ, Juty N, Keating S, Nookaew I, Le Novère N, Malys N, Mazein A, Papin JA, Price ND,  
1177 Selkov E, Sigurdsson MI, Simeonidis E, Sonnenschein N, Smallbone K, Sorokin A, van  
1178 Beek JHGM, Weichart D, Goryanin I, Nielsen J, Westerhoff HV, Kell DB, Mendes P,  
1179 Palsson BØ. 2013. A community-driven global reconstruction of human metabolism.  
1180 Nat Biotechnol 31.
- 1181 44. Aung HW, Henry SA, Walker LP. 2013. Revising the Representation of Fatty Acid,  
1182 Glycerolipid, and Glycerophospholipid Metabolism in the Consensus Model of Yeast  
1183 Metabolism. *Industrial Biotechnology* 9:215–228.
- 1184 45. Dobson PD, Smallbone K, Jameson D, Simeonidis E, Lanthaler K, Pir P, Lu C, Swainston  
1185 N, Dunn WB, Fisher P, Hull D, Brown M, Oshota O, Stanford NJ, Kell DB, King RD, Oliver  
1186 SG, Stevens RD, Mendes P. 2010. Further developments towards a genome-scale  
1187 metabolic model of yeast. *BMC Syst Biol* 4:145.
- 1188 46. Heavner BD, Smallbone K, Barker B, Mendes P, Walker LP. 2012. Yeast 5 – an expanded  
1189 reconstruction of the *Saccharomyces cerevisiae* metabolic network. *BMC Systems*  
1190 *Biology* 6:55.
- 1191 47. Heavner BD, Smallbone K, Price ND, Walker LP. 2013. Version 6 of the consensus yeast  
1192 metabolic network refines biochemical coverage and improves model performance.  
1193 *Database (Oxford)* 2013:bat059.
- 1194 48. Herrgård MJ, Swainston N, Dobson P, Dunn WB, Arga KY, Arvas M, Blüthgen N, Borger  
1195 S, Costenoble R, Heinemann M, Hucka M, Le Novère N, Li P, Liebermeister W, Mo ML,  
1196 Oliveira AP, Petranovic D, Pettifer S, Simeonidis E, Smallbone K, Spasić I, Weichart D,  
1197 Brent R, Broomhead DS, Westerhoff HV, Kirdar B, Penttilä M, Klipp E, Palsson BØ, Sauer

- 1198 U, Oliver SG, Mendes P, Nielsen J, Kell DB. 2008. A consensus yeast metabolic network  
1199 reconstruction obtained from a community approach to systems biology. *Nat*  
1200 *Biotechnol* 26:1155–1160.
- 1201 49. Lu H, Li F, Sánchez BJ, Zhu Z, Li G, Domenzain I, Marcišauskas S, Anton PM, Lappa D,  
1202 Lieven C, Beber ME, Sonnenschein N, Kerkhoven EJ, Nielsen J. 2019. A consensus *S.*  
1203 *cerevisiae* metabolic model Yeast8 and its ecosystem for comprehensively probing  
1204 cellular metabolism. *Nat Commun* 10:1–13.
- 1205 50. Hefzi H, Ang KS, Hanscho M, Bordbar A, Ruckerbauer D, Lakshmanan M, Orellana CA,  
1206 Baycin-Hizal D, Huang Y, Ley D, Martinez VS, Kyriakopoulos S, Jiménez NE, Zielinski DC,  
1207 Quek L-E, Wulff T, Arnsdorf J, Li S, Lee JS, Paglia G, Loira N, Spahn PN, Pedersen LE,  
1208 Gutierrez JM, King ZA, Lund AM, Nagarajan H, Thomas A, Abdel-Haleem AM, Zanghellini  
1209 J, Kildegaard HF, Voldborg BG, Gerdtzen ZP, Betenbaugh MJ, Palsson BO, Andersen MR,  
1210 Nielsen LK, Borth N, Lee D-Y, Lewis NE. 2016. A Consensus Genome-scale  
1211 Reconstruction of Chinese Hamster Ovary Cell Metabolism. *Cell Systems* 3:434-443.e8.
- 1212 51. Kanehisa M. 2000. KEGG: Kyoto Encyclopedia of Genes and Genomes. *Nucleic Acids*  
1213 *Research* 28:27–30.
- 1214 52. Kanehisa M, Sato Y, Furumichi M, Morishima K, Tanabe M. 2019. New approach for  
1215 understanding genome variations in KEGG. *Nucleic Acids Research* 47:D590–D595.
- 1216 53. Karp PD, Billington R, Caspi R, Fulcher CA, Latendresse M, Kothari A, Keseler IM,  
1217 Krummenacker M, Midford PE, Ong Q, Ong WK, Paley SM, Subhraveti P. 2017. The  
1218 BioCyc collection of microbial genomes and metabolic pathways. *Brief Bioinform.*

- 1219 54. Hastings J, Owen G, Dekker A, Ennis M, Kale N, Muthukrishnan V, Turner S, Swainston  
1220 N, Mendes P, Steinbeck C. 2016. ChEBI in 2016: Improved services and an expanding  
1221 collection of metabolites. *Nucleic Acids Res* 44:D1214–D1219.
- 1222 55. Moretti S, Martin O, Van Du Tran T, Bridge A, Morgat A, Pagni M. 2016.  
1223 MetaNetX/MNXref – reconciliation of metabolites and biochemical reactions to bring  
1224 together genome-scale metabolic networks. *Nucleic Acids Res* 44:D523–D526.
- 1225 56. King ZA, Lu J, Dräger A, Miller P, Federowicz S, Lerman JA, Ebrahim A, Pálsson BO, Lewis  
1226 NE, J. H. 2016. BiGG Models: A platform for integrating, standardizing and sharing  
1227 genome-scale models. *Nucleic Acids Research* 44:D515–D522.
- 1228 57. The UniProt Consortium. 2019. UniProt: a worldwide hub of protein knowledge. *Nucleic*  
1229 *Acids Res* 47:D506–D515.
- 1230 58. Thiele I, Pálsson BØ. 2010. A protocol for generating a high-quality genome-scale  
1231 metabolic reconstruction. *Nature protocols* 5:93–121.
- 1232 59. Flamholz A, Noor E, Bar-Even A, Milo R. 2012. eQuilibrator—the biochemical  
1233 thermodynamics calculator. *Nucleic Acids Res* 40:D770–D775.
- 1234 60. Chakrabarty AM. 1998. Nucleoside diphosphate kinase: role in bacterial growth,  
1235 virulence, cell signalling and polysaccharide synthesis. *Molecular Microbiology* 28:875–  
1236 882.
- 1237 61. Yoshida M, Muneyuki E, Hisabori T. 2001. ATP synthase — a marvellous rotary engine  
1238 of the cell. *Nat Rev Mol Cell Biol* 2:669–677.

- 1239 62. Getsin I, Nalbandian GH, Yee DC, Vastermark A, Papparoditis PC, Reddy VS, Saier MH.  
1240 2013. Comparative genomics of transport proteins in developmental bacteria:  
1241 *Myxococcus xanthus* and *Streptomyces coelicolor*. *BMC Microbiol* 13:279.
- 1242 63. Smirnov A, Esnault C, Prigent M, Holland IB, Virolle M-J. 2015. Phosphate Homeostasis  
1243 in Conditions of Phosphate Proficiency and Limitation in the Wild Type and the *phoP*  
1244 Mutant of *Streptomyces lividans*. *PLoS One* 10.
- 1245 64. Orth JD, Thiele I, Palsson BØO. 2010. What is flux balance analysis? *Nat Biotech* 28:245–  
1246 248.
- 1247 65. Bordel S, Agren R, Nielsen J. 2010. Sampling the Solution Space in Genome-Scale  
1248 Metabolic Networks Reveals Transcriptional Regulation in Key Enzymes. *PLOS*  
1249 *Computational Biology* 6:e1000859.
- 1250 66. Martín JF, Santos-Beneit F, Rodríguez-García A, Sola-Landa A, Smith MCM, Ellingsen TE,  
1251 Nieselt K, Burroughs NJ, Wellington EMH. 2012. Transcriptomic studies of phosphate  
1252 control of primary and secondary metabolism in *Streptomyces coelicolor*. *Appl*  
1253 *Microbiol Biotechnol* 95:61–75.
- 1254 67. Martín-Martín S, Rodríguez-García A, Santos-Beneit F, Franco-Domínguez E, Sola-Landa  
1255 A, Martín JF. 2018. Self-control of the PHO regulon: the PhoP-dependent protein PhoU  
1256 controls negatively expression of genes of PHO regulon in *Streptomyces coelicolor*. *The*  
1257 *Journal of Antibiotics* 71:113–122.

- 1258 68. Sola-Landa A, Moura RS, Martín JF. 2003. The two-component PhoR-PhoP system  
1259 controls both primary metabolism and secondary metabolite biosynthesis in  
1260 *Streptomyces lividans*. *Proc Natl Acad Sci U S A* 100:6133–6138.
- 1261 69. Martín JF, Rodríguez-García A, Liras P. 2017. The master regulator PhoP coordinates  
1262 phosphate and nitrogen metabolism, respiration, cell differentiation and antibiotic  
1263 biosynthesis: comparison in *Streptomyces coelicolor* and *Streptomyces avermitilis*. *The*  
1264 *Journal of Antibiotics* 70:534–541.
- 1265 70. Li L, Jiang W, Lu Y. 2017. A Novel Two-Component System, GluR-GluK, Involved in  
1266 Glutamate Sensing and Uptake in *Streptomyces coelicolor*. *Journal of Bacteriology* 199.
- 1267 71. Fink D, Weißschuh N, Reuther J, Wohlleben W, Engels A. 2002. Two transcriptional  
1268 regulators GlnR and GlnRII are involved in regulation of nitrogen metabolism in  
1269 *Streptomyces coelicolor* A3(2). *Molecular Microbiology* 46:331–347.
- 1270 72. Martín JF. 2004. Phosphate Control of the Biosynthesis of Antibiotics and Other  
1271 Secondary Metabolites Is Mediated by the PhoR-PhoP System: an Unfinished Story.  
1272 *Journal of Bacteriology* 186:5197–5201.
- 1273 73. Stirrett K, Denoya C, Westpheling J. 2009. Branched-chain amino acid catabolism  
1274 provides precursors for the Type II polyketide antibiotic, actinorhodin, via pathways  
1275 that are nutrient dependent. *J Ind Microbiol Biotechnol* 36:129–137.
- 1276 74. Esnault C, Dulermo T, Smirnov A, Askora A, David M, Deniset-Besseau A, Holland I-B,  
1277 Virolle M-J. 2017. Strong antibiotic production is correlated with highly active oxidative  
1278 metabolism in *Streptomyces coelicolor* M145. *Scientific Reports* 7:200.

- 1279 75. Borodina I, Siebring J, Zhang J, Smith CP, Keulen G van, Dijkhuizen L, Nielsen J. 2008.  
1280 Antibiotic Overproduction in *Streptomyces coelicolor* A3(2) Mediated by  
1281 Phosphofructokinase Deletion. *J Biol Chem* 283:25186–25199.
- 1282 76. Jonsbu E, Christensen B, Nielsen J. 2001. Changes of in vivo fluxes through central  
1283 metabolic pathways during the production of nystatin by *Streptomyces noursei* in batch  
1284 culture. *Appl Microbiol Biotechnol* 56:93–100.
- 1285 77. Gallo G, Renzone G, Alduina R, Stegmann E, Weber T, Lantz AE, Thykaer J, Sangiorgi F,  
1286 Scaloni A, Puglia AM. 2010. Differential proteomic analysis reveals novel links between  
1287 primary metabolism and antibiotic production in *Amycolatopsis balhimycina*.  
1288 *PROTEOMICS* 10:1336–1358.
- 1289 78. Coze F, Gilard F, Tcherkez G, Virolle M-J, Guyonvarch A. 2013. Carbon-Flux Distribution  
1290 within *Streptomyces coelicolor* Metabolism: A Comparison between the Actinorhodin-  
1291 Producing Strain M145 and Its Non-Producing Derivative M1146. *PLOS ONE* 8:e84151.
- 1292 79. Millan-Oropeza A, Henry C, Blein-Nicolas M, Aubert-Frambourg A, Moussa F, Bleton J,  
1293 Virolle M-J. 2017. Quantitative Proteomics Analysis Confirmed Oxidative Metabolism  
1294 Predominates in *Streptomyces coelicolor* versus Glycolytic Metabolism in *Streptomyces*  
1295 *lividans*. *J Proteome Res* 16:2597–2613.
- 1296 80. Ashburner M, Ball CA, Blake JA, Botstein D, Butler H, Cherry JM, Davis AP, Dolinski K,  
1297 Dwight SS, Eppig JT, Harris MA, Hill DP, Issel-Tarver L, Kasarskis A, Lewis S, Matese JC,  
1298 Richardson JE, Ringwald M, Rubin GM, Sherlock G. 2000. Gene ontology: tool for the  
1299 unification of biology. The Gene Ontology Consortium. *Nat Genet* 25:25–29.



- 1300 81. The Gene Ontology Consortium. 2019. The Gene Ontology Resource: 20 years and still  
1301 GOing strong. *Nucleic Acids Res* 47:D330–D338.
- 1302 82. Stahl W, Sies H. 2003. Antioxidant activity of carotenoids. *Molecular Aspects of*  
1303 *Medicine* 24:345–351.
- 1304 83. Latifi A, Ruiz M, Zhang C-C. 2009. Oxidative stress in cyanobacteria. *FEMS Microbiol Rev*  
1305 33:258–278.
- 1306 84. Zangar RC, Davydov DR, Verma S. 2004. Mechanisms that regulate production of  
1307 reactive oxygen species by cytochrome P450. *Toxicology and Applied Pharmacology*  
1308 199:316–331.
- 1309 85. Lamb DC, Ikeda H, Nelson DR, Ishikawa J, Skaug T, Jackson C, Omura S, Waterman MR,  
1310 Kelly SL. 2003. Cytochrome P450 complement (CYPome) of the avermectin-producer  
1311 *Streptomyces avermitilis* and comparison to that of *Streptomyces coelicolor* A3(2).  
1312 *Biochemical and Biophysical Research Communications* 307:610–619.
- 1313 86. Bednarz B, Kotowska M, Pawlik KJ. 2019. Multi-level regulation of coelimycin synthesis  
1314 in *Streptomyces coelicolor* A3(2). *Appl Microbiol Biotechnol* 103:6423–6434.
- 1315 87. Li X, Wang J, Li S, Ji J, Wang W, Yang K. 2015. ScbR- and ScbR2-mediated signal  
1316 transduction networks coordinate complex physiological responses in *Streptomyces*  
1317 *coelicolor*. *Scientific Reports* 5:14831.
- 1318 88. Lee P-C, Umeyama T, Horinouchi S. 2002. afsS is a target of AfsR, a transcriptional factor  
1319 with ATPase activity that globally controls secondary metabolism in *Streptomyces*  
1320 *coelicolor* A3(2). *Molecular Microbiology* 43:1413–1430.

- 1321 89. Horinouchi S. 2003. AfsR as an integrator of signals that are sensed by multiple  
1322 serine/threonine kinases in *Streptomyces coelicolor* A3(2). *J IND MICROBIOL*  
1323 *BIOTECHNOL* 30:462–467.
- 1324 90. Naseer N, Shapiro JA, Chander M. 2014. RNA-Seq analysis reveals a six-gene SoxR  
1325 regulon in *Streptomyces coelicolor*. *PLoS ONE* 9:e106181.
- 1326 91. Dela Cruz R, Gao Y, Penumetcha S, Sheplock R, Weng K, Chander M. 2010. Expression  
1327 of the *Streptomyces coelicolor* SoxR regulon is intimately linked with actinorhodin  
1328 production. *J Bacteriol* 192:6428–6438.
- 1329 92. Shin J-H, Singh AK, Cheon D-J, Roe J-H. 2011. Activation of the SoxR regulon in  
1330 *Streptomyces coelicolor* by the extracellular form of the pigmented antibiotic  
1331 actinorhodin. *J Bacteriol* 193:75–81.
- 1332 93. Valton J, Mathevon C, Fontecave M, Nivière V, Ballou DP. 2008. Mechanism and  
1333 regulation of the Two-component FMN-dependent monooxygenase ActVA-ActVB from  
1334 *Streptomyces coelicolor*. *J Biol Chem* 283:10287–10296.
- 1335 94. Burgos HL, O'Connor K, Sanchez-Vazquez P, Gourse RL. 2017. Roles of Transcriptional  
1336 and Translational Control Mechanisms in Regulation of Ribosomal Protein Synthesis in  
1337 *Escherichia coli*. *J Bacteriol* 199.
- 1338 95. Hesketh A, Chen WJ, Ryding J, Chang S, Bibb M. 2007. The global role of ppGpp synthesis  
1339 in morphological differentiation and antibiotic production in *Streptomyces coelicolor*  
1340 A3(2). *Genome Biol* 8:R161.

- 1341 96. Srivatsan A, Wang JD. 2008. Control of bacterial transcription, translation and  
1342 replication by (p)ppGpp. *Current Opinion in Microbiology* 11:100–105.
- 1343 97. Gaal T, Bartlett MS, Ross W, Turnbough CL, Gourse RL. 1997. Transcription Regulation  
1344 by Initiating NTP Concentration: rRNA Synthesis in Bacteria. *Science* 278:2092–2097.
- 1345 98. Chemler JA, Buchholz TJ, Geders TW, Akey DL, Rath CM, Chlipala GE, Smith JL, Sherman  
1346 DH. 2012. Biochemical and Structural Characterization of Germicidin Synthase: Analysis  
1347 of a Type III Polyketide Synthase that Employs Acyl-ACP as a Starter Unit Donor. *J Am*  
1348 *Chem Soc* 134:7359–7366.
- 1349 99. Xu J, Tozawa Y, Lai C, Hayashi H, Ochi K. 2002. A rifampicin resistance mutation in the  
1350 *rpoB* gene confers ppGpp-independent antibiotic production in *Streptomyces coelicolor*  
1351 *A3(2)*. *Mol Gen Genomics* 268:179–189.
- 1352 100. Craney A, Ozimok C, Pimentel-Elardo SM, Capretta A, Nodwell JR. 2012. Chemical  
1353 Perturbation of Secondary Metabolism Demonstrates Important Links to Primary  
1354 Metabolism. *Chemistry & Biology* 19:1020–1027.
- 1355 101. Courtot M, Juty N, Knüpfer C, Waltemath D, Zhukova A, Dräger A, Dumontier M, Finney  
1356 A, Golebiewski M, Hastings J, Hoops S, Keating S, Kell DB, Kerrien S, Lawson J, Lister A,  
1357 Lu J, Machne R, Mendes P, Pocock M, Rodriguez N, Villegier A, Wilkinson DJ,  
1358 Wimalaratne S, Laibe C, Hucka M, Le Novère N. 2011. Controlled vocabularies and  
1359 semantics in systems biology. *Mol Syst Biol* 7:543.
- 1360 102. Noor E, Haraldsdóttir HS, Milo R, Fleming RMT. 2013. Consistent Estimation of Gibbs  
1361 Energy Using Component Contributions. *PLOS Computational Biology* 9:e1003098.

- 1362 103. Bar-Even A, Flamholz A, Noor E, Milo R. 2012. Thermodynamic constraints shape the  
1363 structure of carbon fixation pathways. *Biochimica et Biophysica Acta (BBA) -*  
1364 *Bioenergetics* 1817:1646–1659.
- 1365 104. Feist AM, Henry CS, Reed JL, Krummenacker M, Joyce AR, Karp PD, Broadbelt LJ,  
1366 Hatzimanikatis V, Palsson BØ. 2007. A genome-scale metabolic reconstruction for  
1367 *Escherichia coli* K-12 MG1655 that accounts for 1260 ORFs and thermodynamic  
1368 information. *Molecular Systems Biology* 3:121.
- 1369 105. Elbourne LDH, Tetu SG, Hassan KA, Paulsen IT. 2017. TransportDB 2.0: a database for  
1370 exploring membrane transporters in sequenced genomes from all domains of life.  
1371 *Nucleic Acids Research* 45:D320–D324.
- 1372 106. Saier MH, Reddy VS, Tsu BV, Ahmed MS, Li C, Moreno-Hagelsieb G. 2016. The  
1373 Transporter Classification Database (TCDB): recent advances. *Nucleic Acids Res*  
1374 44:D372–D379.
- 1375 107. NCBI Resource Coordinators. 2017. Database Resources of the National Center for  
1376 Biotechnology Information. *Nucleic Acids Research* 45:D12–D17.
- 1377 108. Jeske L, Placzek S, Schomburg I, Chang A, Schomburg D. 2019. BRENDA in 2019: a  
1378 European ELIXIR core data resource. *Nucleic Acids Res* 47:D542–D549.
- 1379 109. Fritzeimer CJ, Hartleb D, Szappanos B, Papp B, Lercher MJ. 2017. Erroneous energy-  
1380 generating cycles in published genome scale metabolic networks: Identification and  
1381 removal. *PLOS Computational Biology* 13:e1005494.

- 1382 110. Noor E. 2018. Removing both Internal and Unrealistic Energy-Generating Cycles in Flux  
1383 Balance Analysis. arXiv:180304999 [q-bio].
- 1384 111. Haraldsdóttir HS, Cousins B, Thiele I, Fleming RMT, Vempala S. 2017. CHRR: coordinate  
1385 hit-and-run with rounding for uniform sampling of constraint-based models.  
1386 Bioinformatics 33:1741–1743.
- 1387 112. Kaufman DE, Smith RL. 1998. Direction Choice for Accelerated Convergence in Hit-and-  
1388 Run Sampling. Operations Research 46:84–95.
- 1389 113. Megchelenbrink W, Huynen M, Marchiori E. 2014. optGpSampler: An Improved Tool for  
1390 Uniformly Sampling the Solution-Space of Genome-Scale Metabolic Networks. PLOS  
1391 ONE 9:e86587.
- 1392 114. Kieser T, Bibb MJ, Buttner M, Chater K, Hopwood DA. 2000. Practical Streptomyces  
1393 Genetics. John Innes Foundation, Norwich, UK.
- 1394 115. Claessen D, Rink R, Jong W de, Siebring J, Vreugd P de, Boersma FGH, Dijkhuizen L,  
1395 Wösten HAB. 2003. A novel class of secreted hydrophobic proteins is involved in aerial  
1396 hyphae formation in *Streptomyces coelicolor* by forming amyloid-like fibrils. Genes Dev  
1397 17:1714–1726.
- 1398 116. Bystrykh LV, Fernández-Moreno MA, Herrema JK, Malpartida F, Hopwood DA,  
1399 Dijkhuizen L. 1996. Production of actinorhodin-related “blue pigments” by  
1400 *Streptomyces coelicolor* A3(2). J Bacteriol 178:2238–2244.
- 1401 117. Gubbens J, Janus M, Florea BI, Overkleeft HS, van Wezel GP. 2012. Identification of  
1402 glucose kinase-dependent and -independent pathways for carbon control of primary

- 1403 metabolism, development and antibiotic production in *Streptomyces coelicolor* by  
1404 quantitative proteomics. *Molecular Microbiology* 86:1490–1507.
- 1405 118. Wessel D, Flügge UI. 1984. A method for the quantitative recovery of protein in dilute  
1406 solution in the presence of detergents and lipids. *Anal Biochem* 138:141–143.
- 1407 119. Rappsilber J, Mann M, Ishihama Y. 2007. Protocol for micro-purification, enrichment,  
1408 pre-fractionation and storage of peptides for proteomics using StageTips. *Nat Protoc*  
1409 2:1896–1906.
- 1410 120. Distler U, Kuharev J, Navarro P, Levin Y, Schild H, Tenzer S. 2014. Drift time-specific  
1411 collision energies enable deep-coverage data-independent acquisition proteomics. *Nat*  
1412 *Methods* 11:167–170.
- 1413 121. Andrews S. 2016. FastQC: a quality control tool for high throughput sequence data.
- 1414 122. Kim D, Langmead B, Salzberg SL. 2015. HISAT: a fast spliced aligner with low memory  
1415 requirements. *Nat Methods* 12:357–360.
- 1416 123. Li H, Handsaker B, Wysoker A, Fennell T, Ruan J, Homer N, Marth G, Abecasis G, Durbin  
1417 R, 1000 Genome Project Data Processing Subgroup. 2009. The Sequence  
1418 Alignment/Map format and SAMtools. *Bioinformatics* 25:2078–2079.
- 1419 124. Okonechnikov K, Conesa A, García-Alcalde F. 2016. Qualimap 2: advanced multi-sample  
1420 quality control for high-throughput sequencing data. *Bioinformatics* 32:292–294.
- 1421 125. Battke F, Nieselt K. 2011. Mayday SeaSight: combined analysis of deep sequencing and  
1422 microarray data. *PLoS ONE* 6:e16345.

- 1423 126. Huang DW, Sherman BT, Lempicki RA. 2009. Bioinformatics enrichment tools: paths  
1424 toward the comprehensive functional analysis of large gene lists. *Nucleic Acids Res*  
1425 37:1–13.
- 1426 127. Huang DW, Sherman BT, Lempicki RA. 2009. Systematic and integrative analysis of large  
1427 gene lists using DAVID bioinformatics resources. *Nat Protoc* 4:44–57.
- 1428 128. Szklarczyk D, Gable AL, Lyon D, Junge A, Wyder S, Huerta-Cepas J, Simonovic M,  
1429 Doncheva NT, Morris JH, Bork P, Jensen LJ, Mering C von. 2019. STRING v11: protein-  
1430 protein association networks with increased coverage, supporting functional discovery  
1431 in genome-wide experimental datasets. *Nucleic Acids Res* 47:D607–D613.
- 1432 129. Perez-Riverol Y, Csordas A, Bai J, Bernal-Llinares M, Hewapathirana S, Kundu DJ,  
1433 Inuganti A, Griss J, Mayer G, Eisenacher M, Pérez E, Uszkoreit J, Pfeuffer J, Sachsenberg  
1434 T, Yilmaz S, Tiwary S, Cox J, Audain E, Walzer M, Jarnuczak AF, Ternent T, Brazma A,  
1435 Vizcaíno JA. 2019. The PRIDE database and related tools and resources in 2019:  
1436 improving support for quantification data. *Nucleic Acids Res* 47:D442–D450.
- 1437
- 1438
